# Supplementary material
Source: PubMed Central journal article supplement (PMC2816022)

acnB

IpDEVFIGSCMTNIGHFR

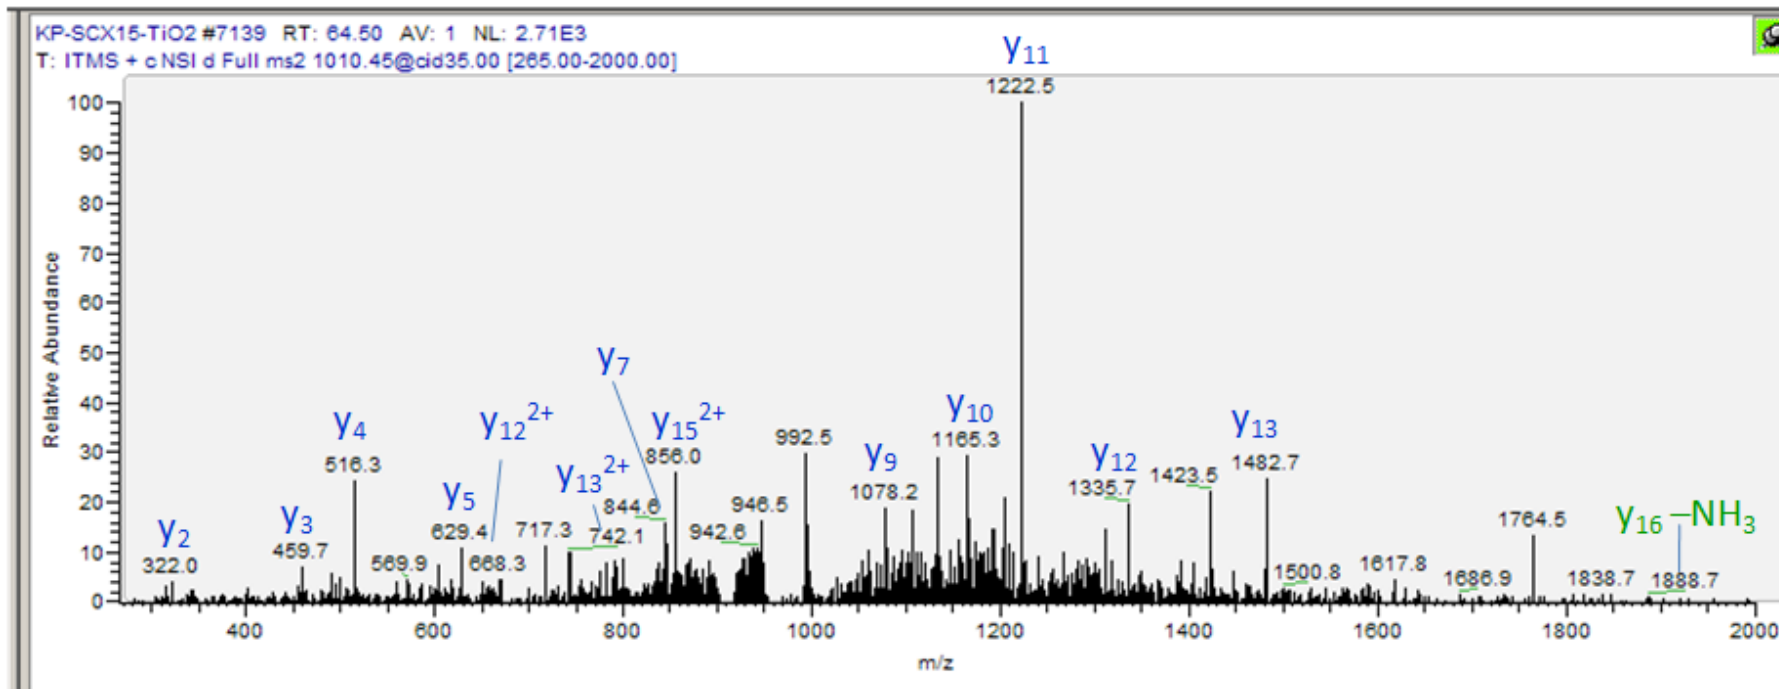

# ahpC

## AAQpYVASHPGEVCPAK

KP-SCX15-TiO2 #2547 RT: 26.19 AV: 1 NL: 6.62E3  
T: ITMS + c NSI d Full ms2 854.88@cid35.00 [225.00-1720.00]

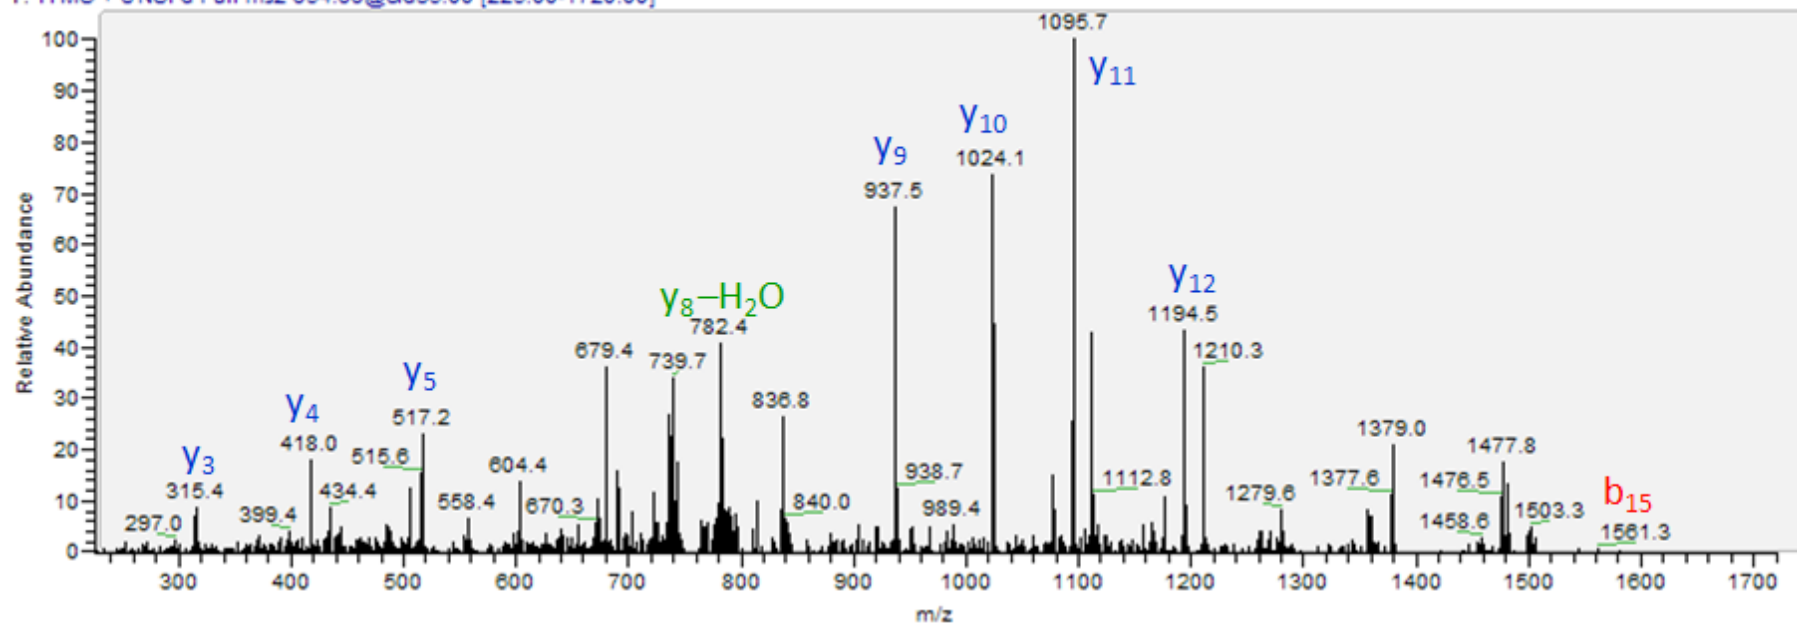

argD

QLCpDQHNALLIFDEVQTGVGR

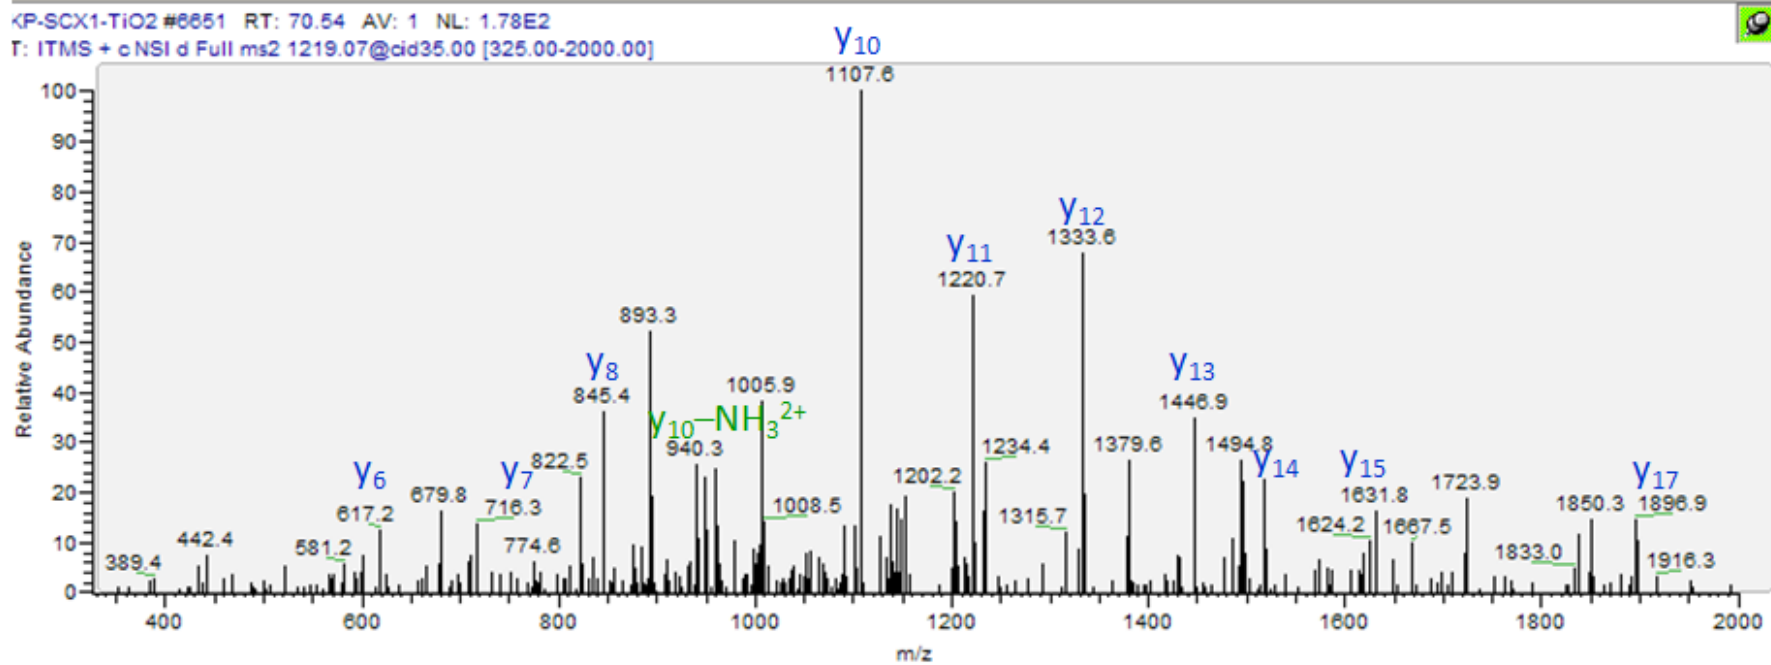

atpA  
IpHGLAECMQGEMISLPGNR

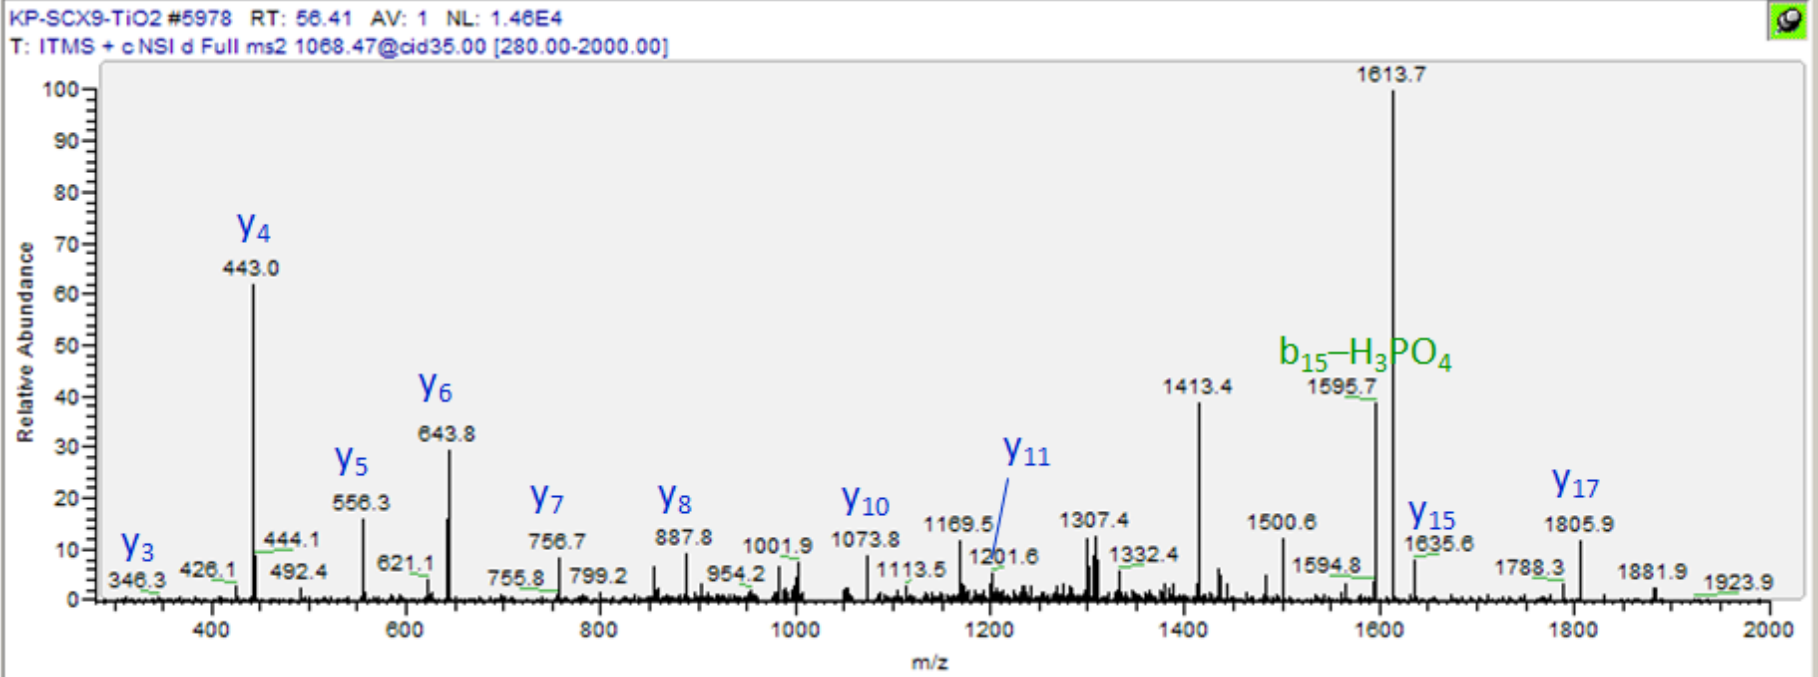

atpD  
AAPp[SY]EELSSSQELLETKIK

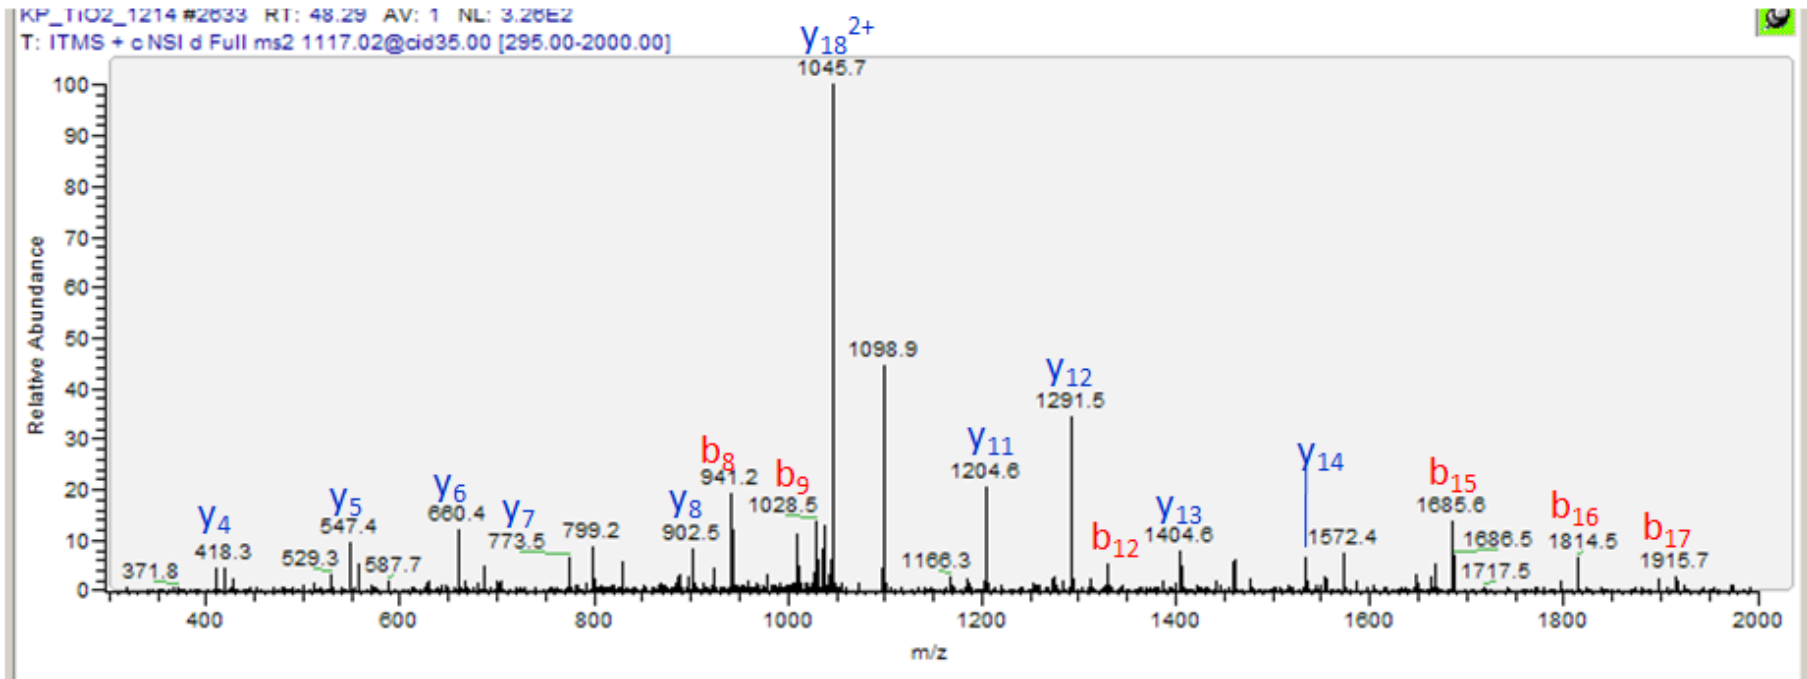

csrA

IQAESQQSp[SY]

KP-IP-TiO2-080115 #3324 RT: 63.45 AV: 1 NL: 2.83E2  
T: ITMS + c NSI d Full ms2 674.79@cid35.00 [175.00-1360.00]

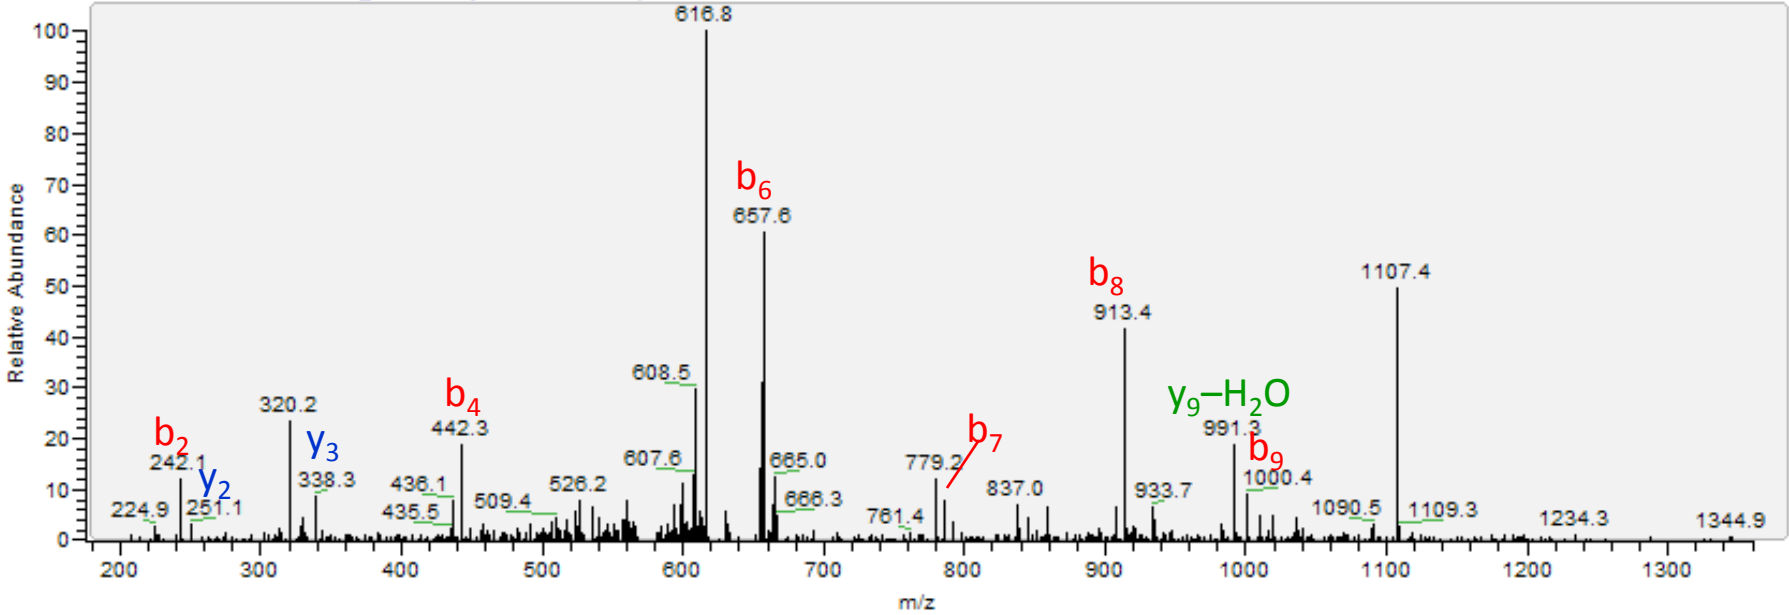

csrA

IQAESQSSpY

KP-TiO2 #2979 RT: 50.99 AV: 1 NL: 3.20E2

T: ITMS + c NSI d Full ms2 674.79@cid35.00 [175.00-1360.00]

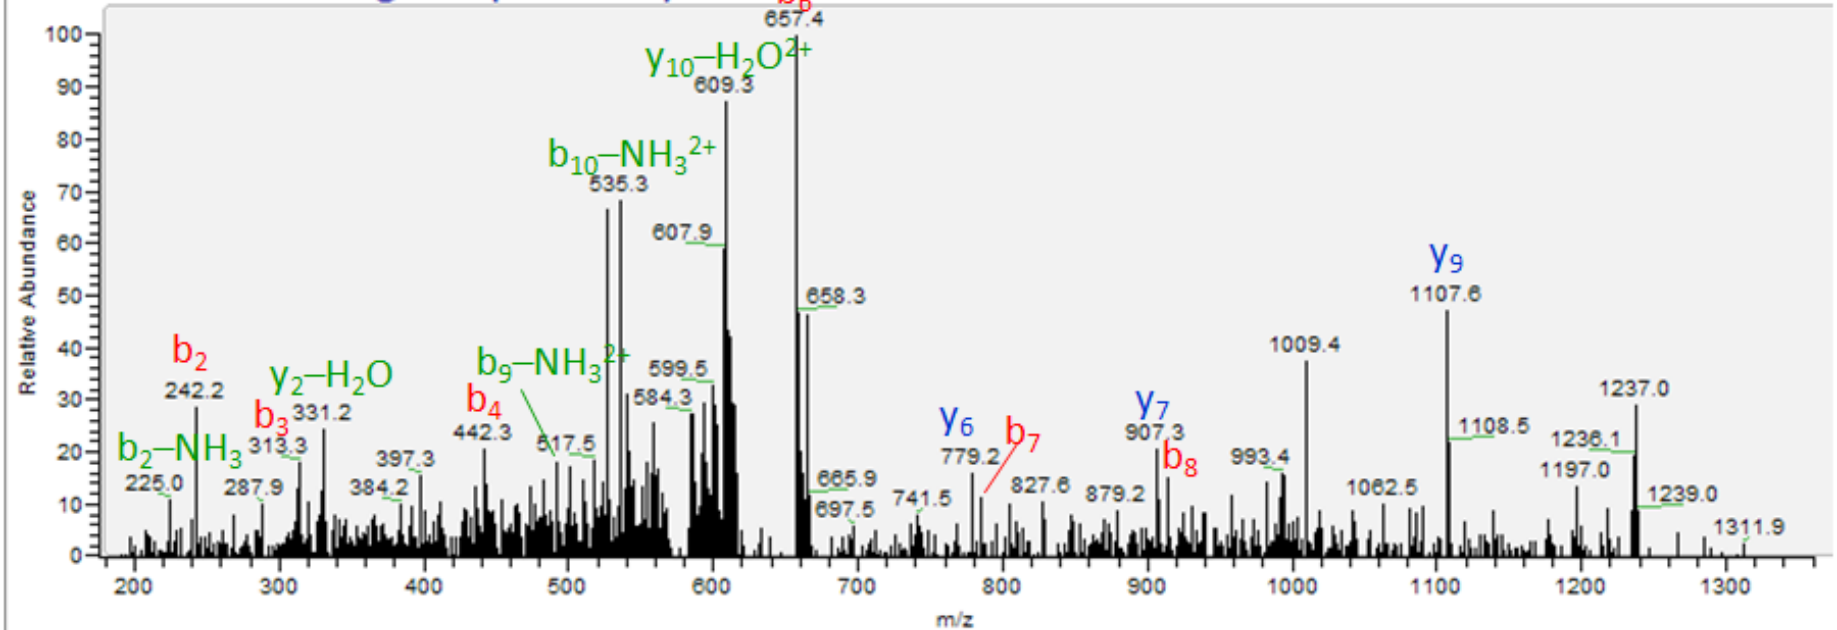

deoB

FGpDVGADTLGHIAEACAK

KP-SCX10-TiO2 #4960 RT: 48.60 AV: 1 NL: 6.39E2  
T: ITMS + c NSI d Full ms2 927.90@cid35.00 [245.00-1870.00]

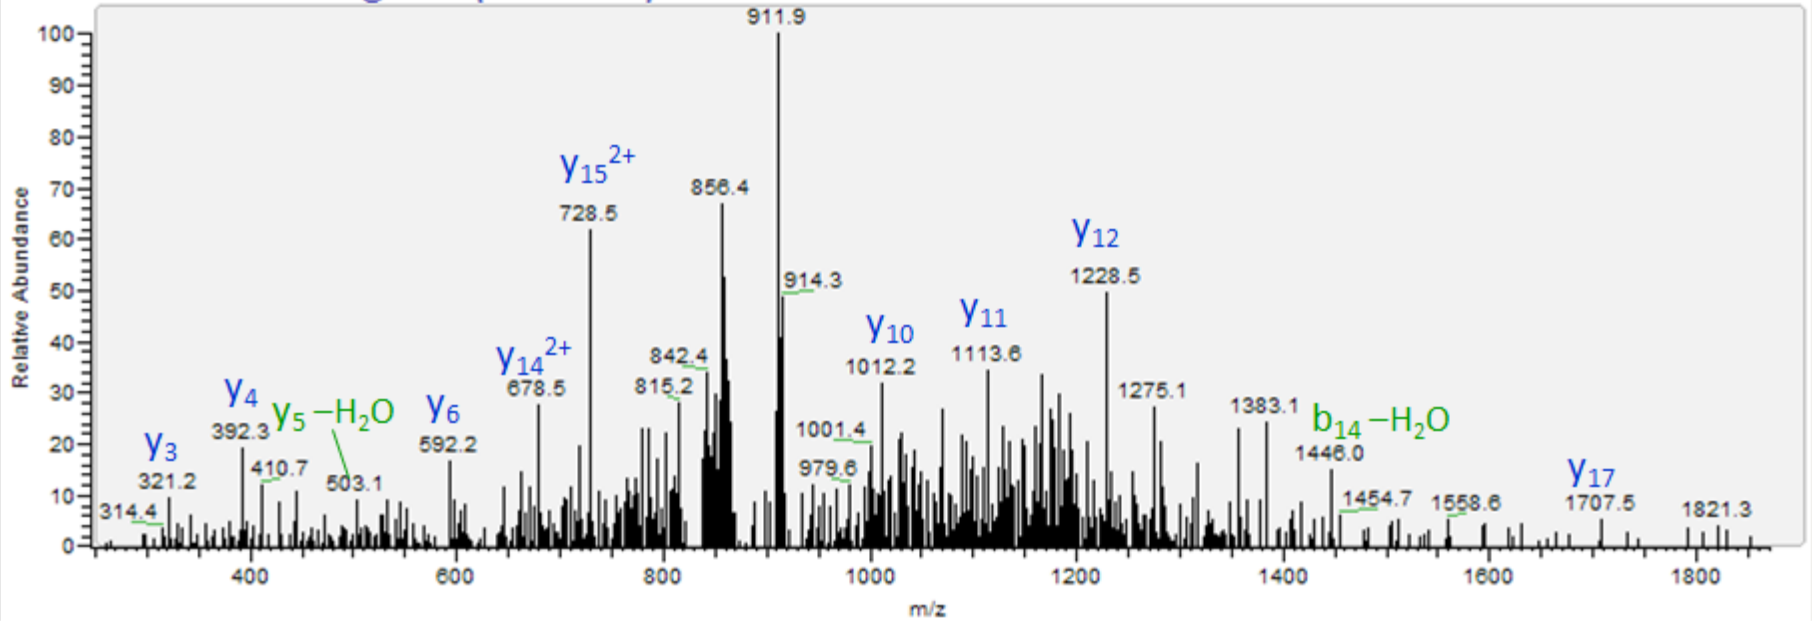



deoC

AAIApYGADEVVFPYR

KP\_TiO2\_1219HCD #2170 RT: 52.67 AV: 1 NL: 1.37E4  
T: FTMS + p NSI d Full ms2 968.95@had35.00 [100.00-1950.00]

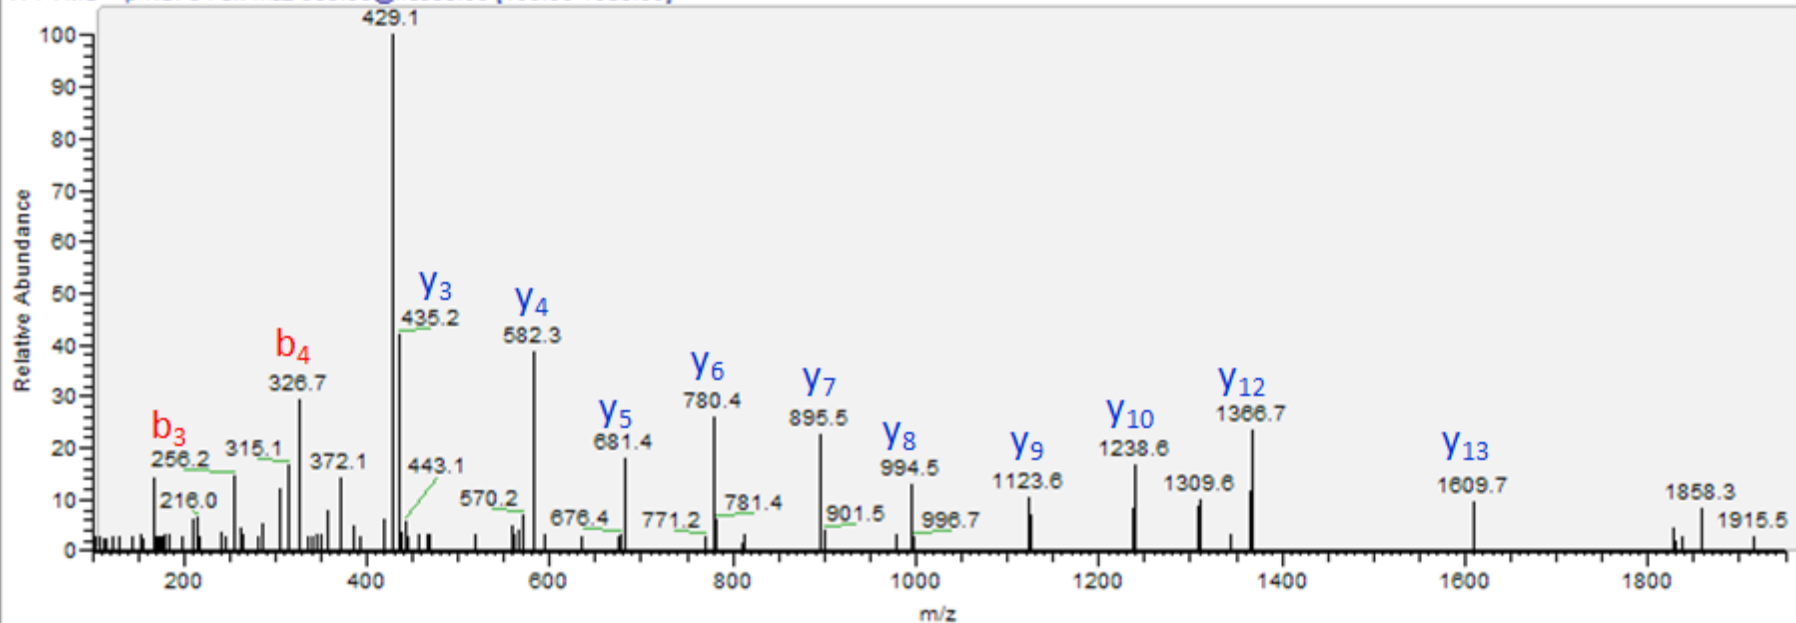

efp  
ATpYYSNDFR

KP-IP-TiO2-080115 #4216 RT: 73.44 AV: 1 NL: 5.73E2  
T: ITMS + c NSI d Full ms2 608.74@cid35.00 [155.00-1230.00]

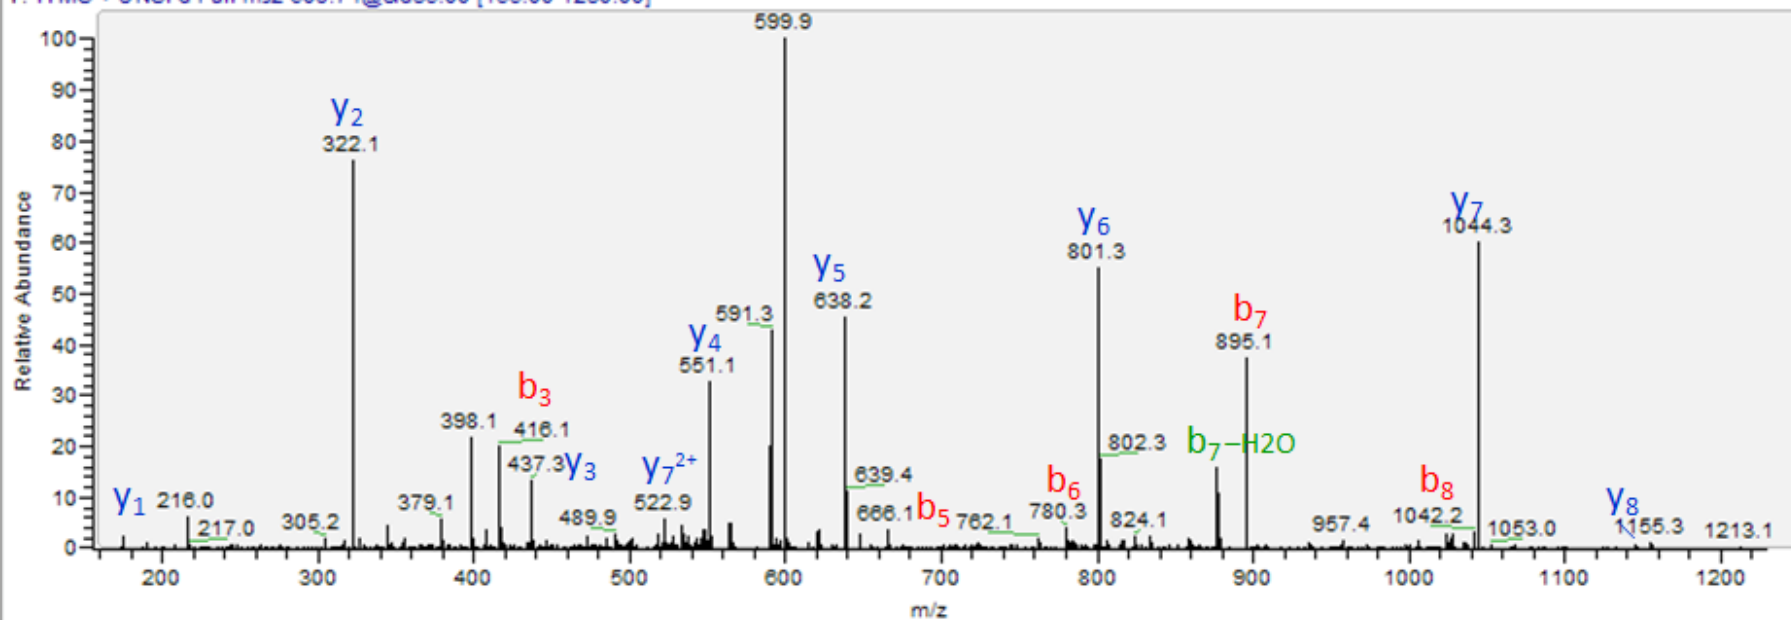

fabF

GPpSISIATACTSGVHNIGQAAR

KP-SCX15-TiO2 #4654 RT: 42.71 AV: 1 NL: 4.58E2  
T: ITMS + c NSI d Full ms2 1096.53@cid35.00 [290.00-2000.00]

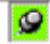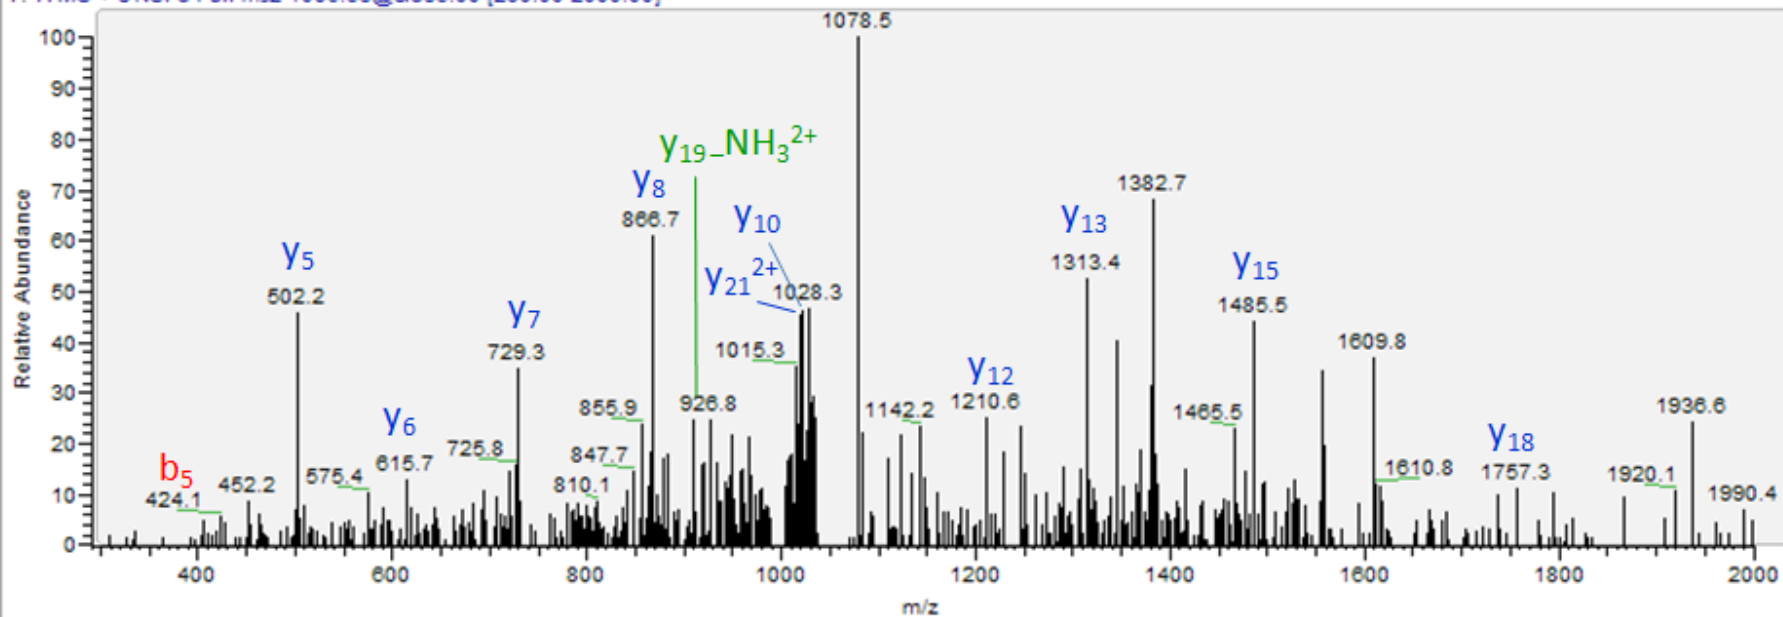

fbaA

HNLPHNSLNFV FHGGp[SGSS]AQEIK

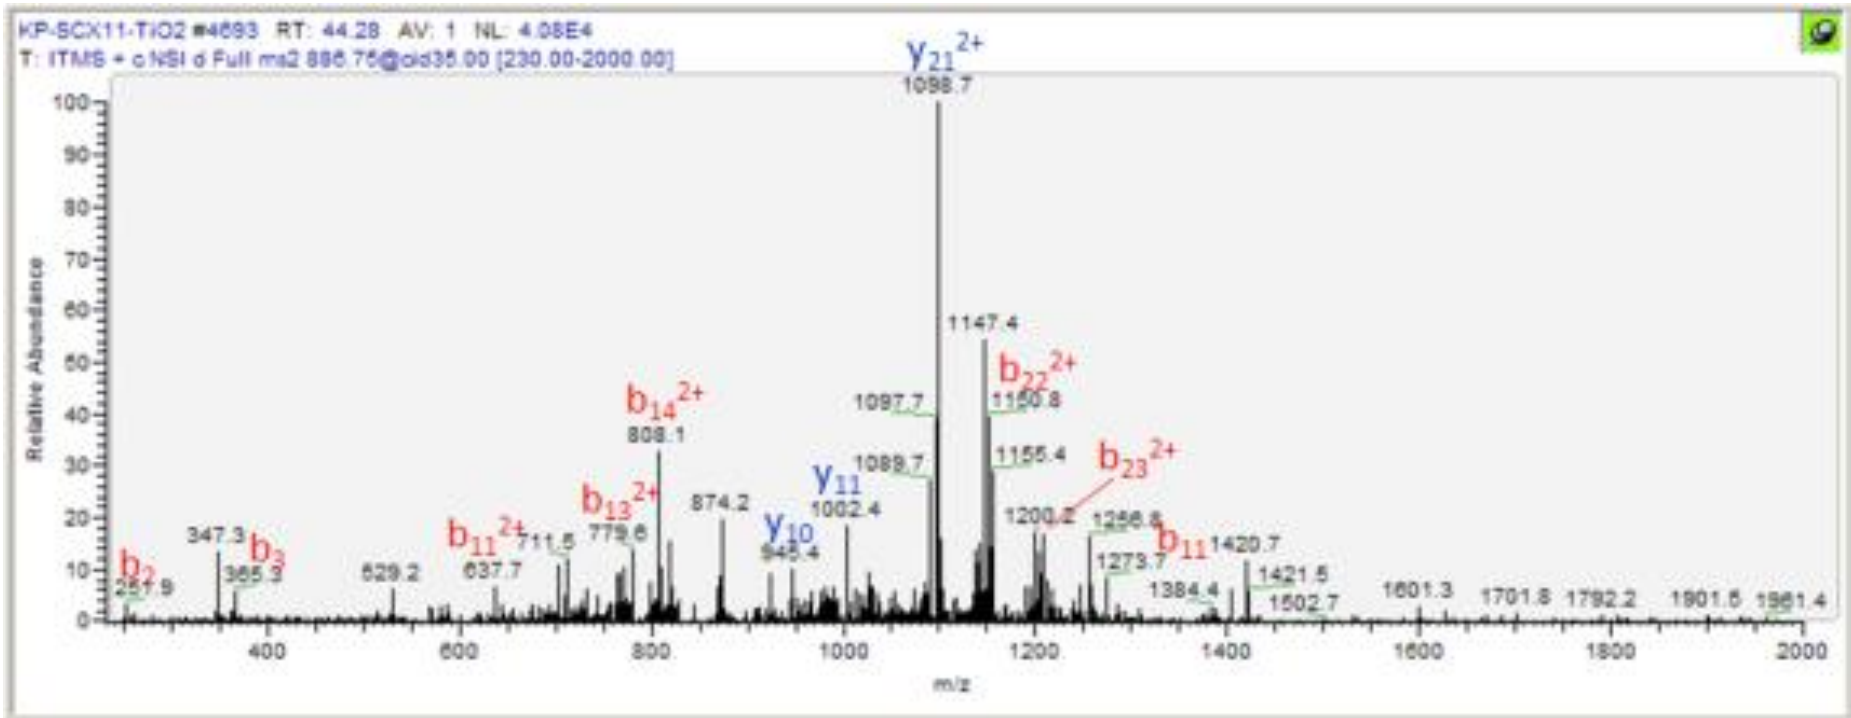

feaB

QpHGLYIDGAPCAAQSENK

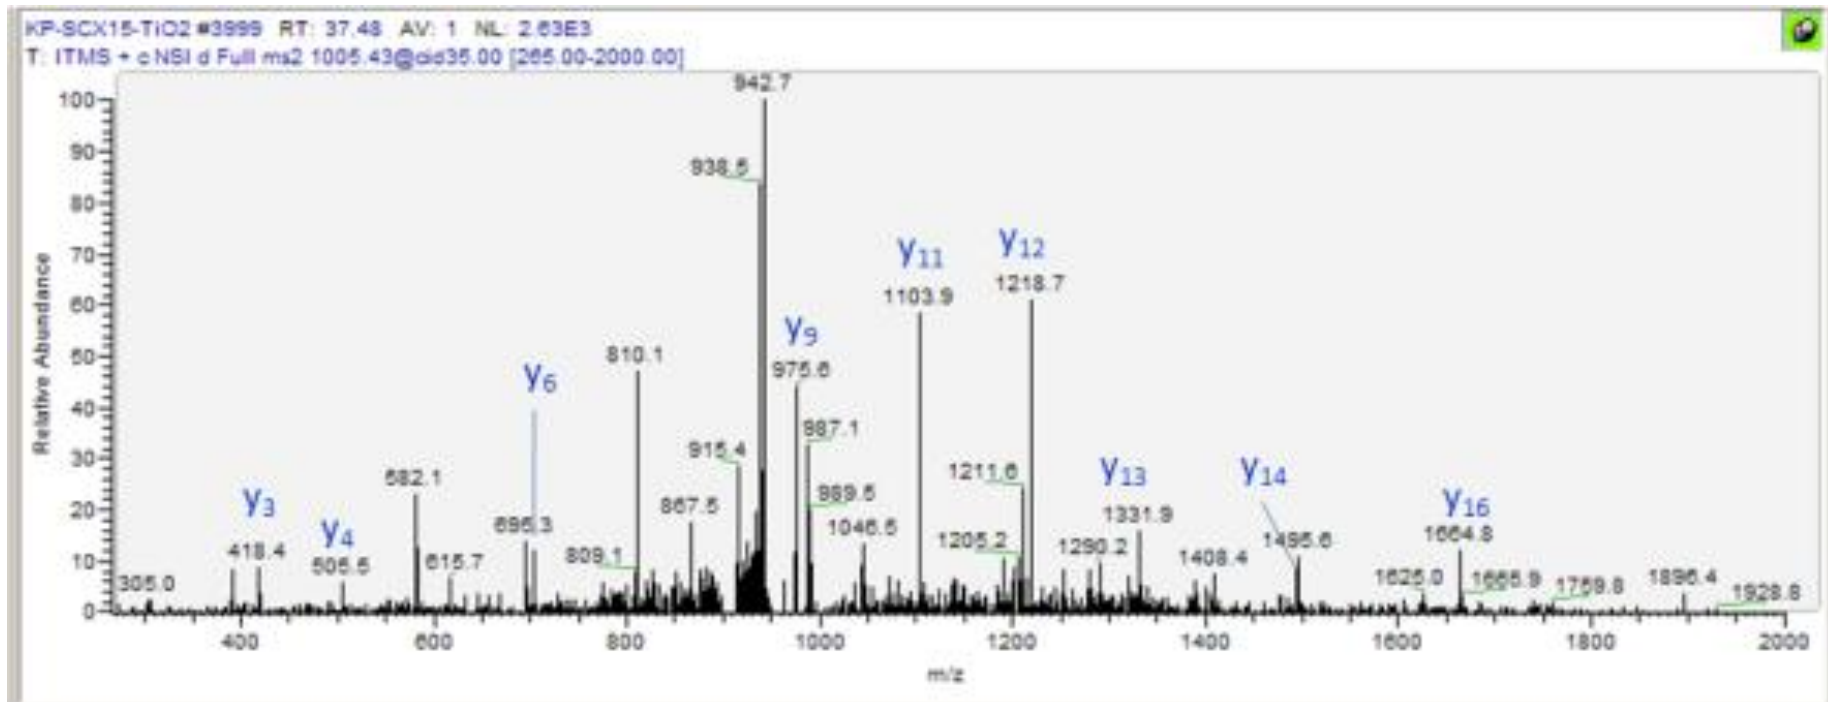

fimA

GEVVNAACAVpDAGSIDQTVQLGQVR

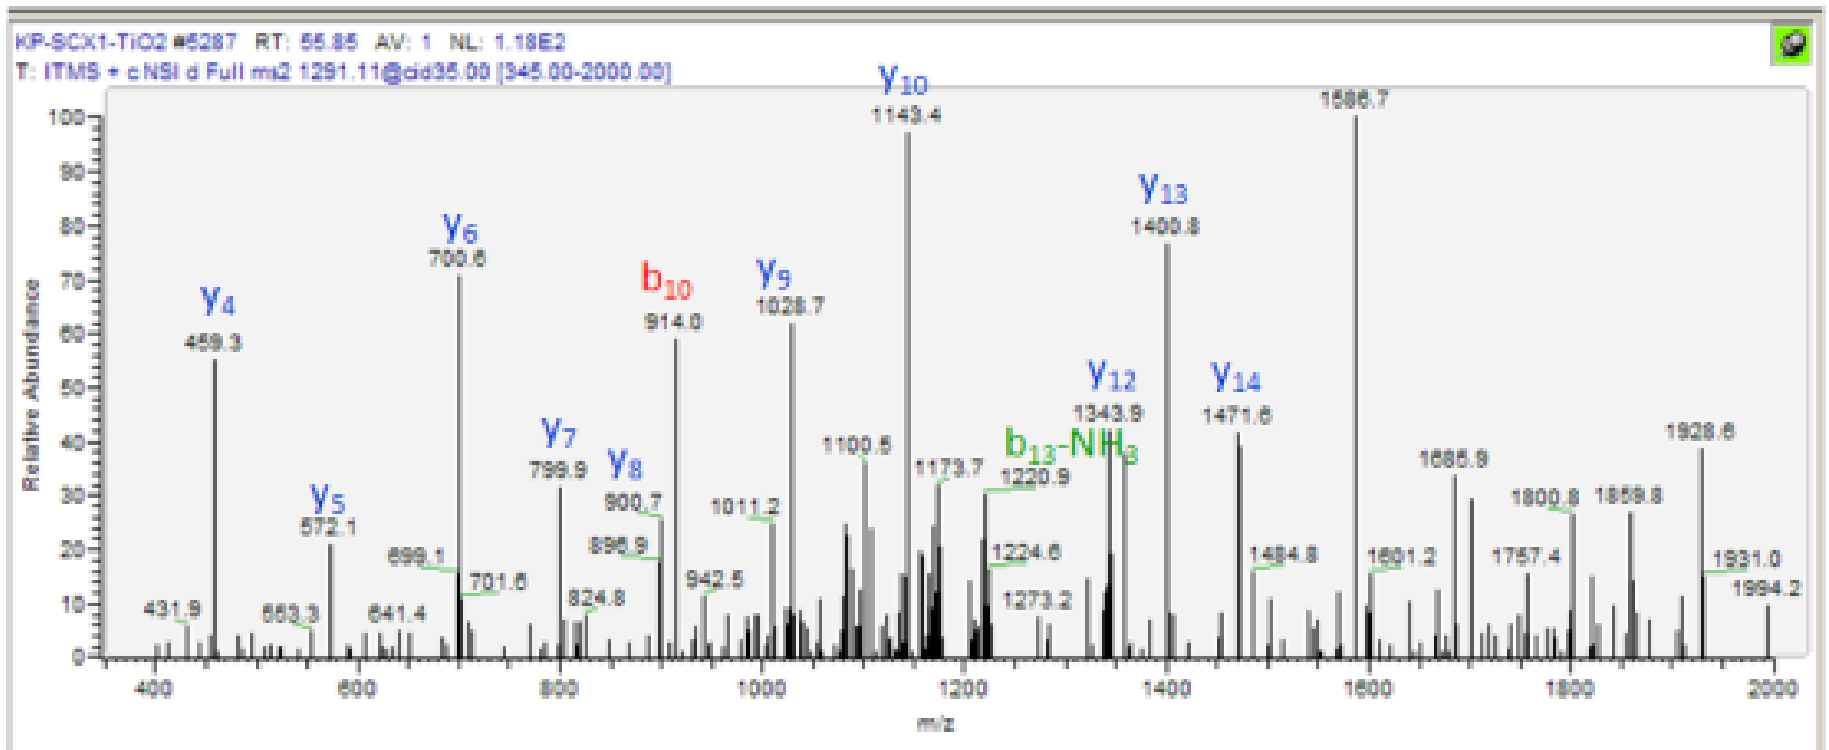

fimA

LAp[**TAGSTSS**]AVGFNIQLDDCDTTVATK

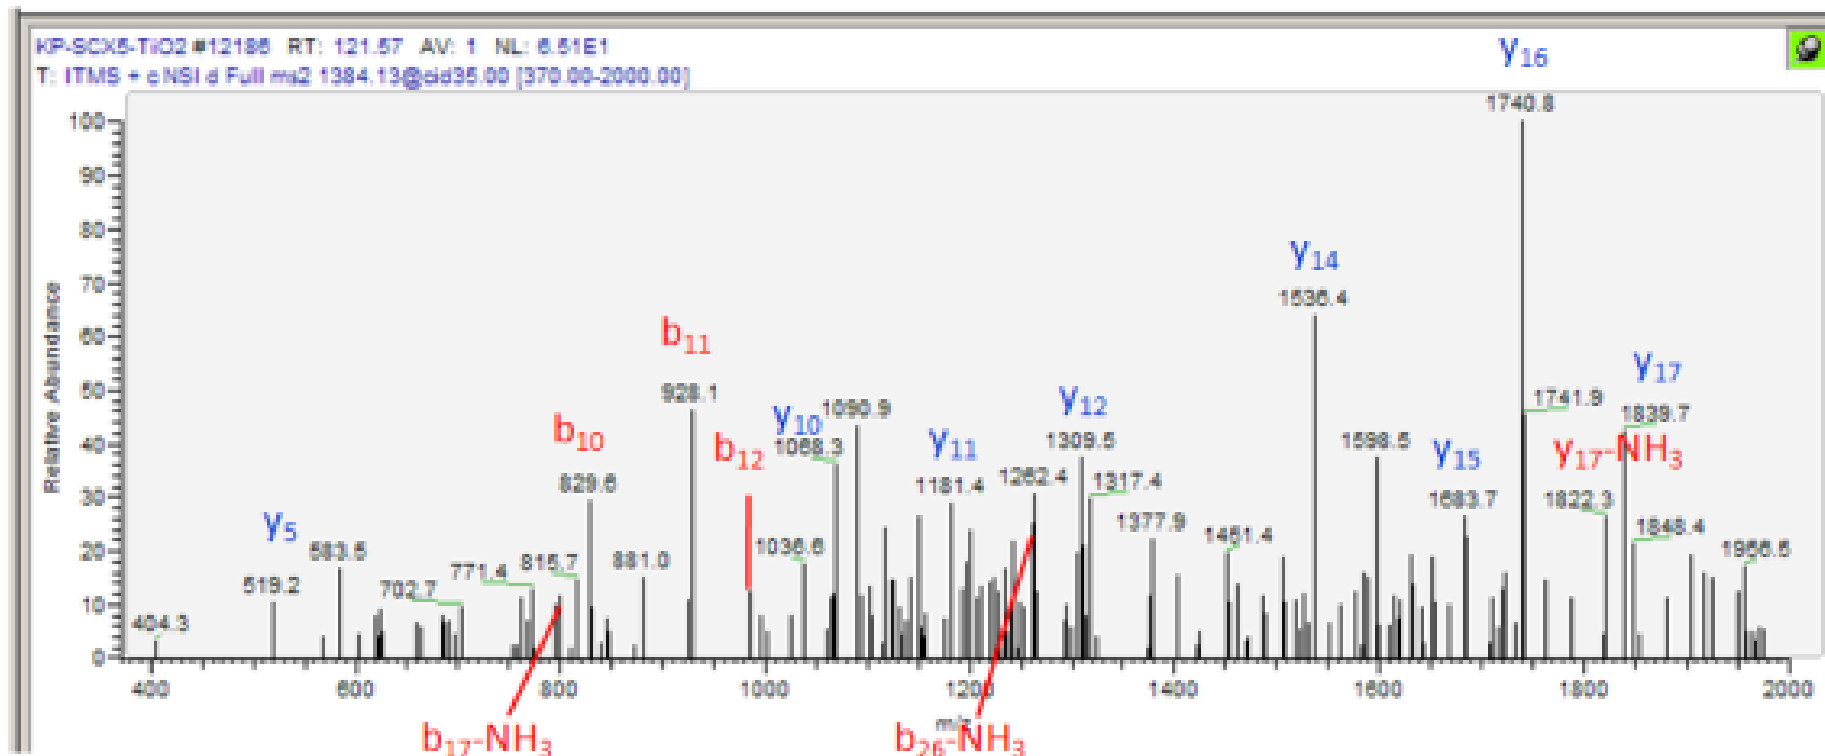

fimA

LATAGSTSpSAVGFNIQLDDCDTTVATK

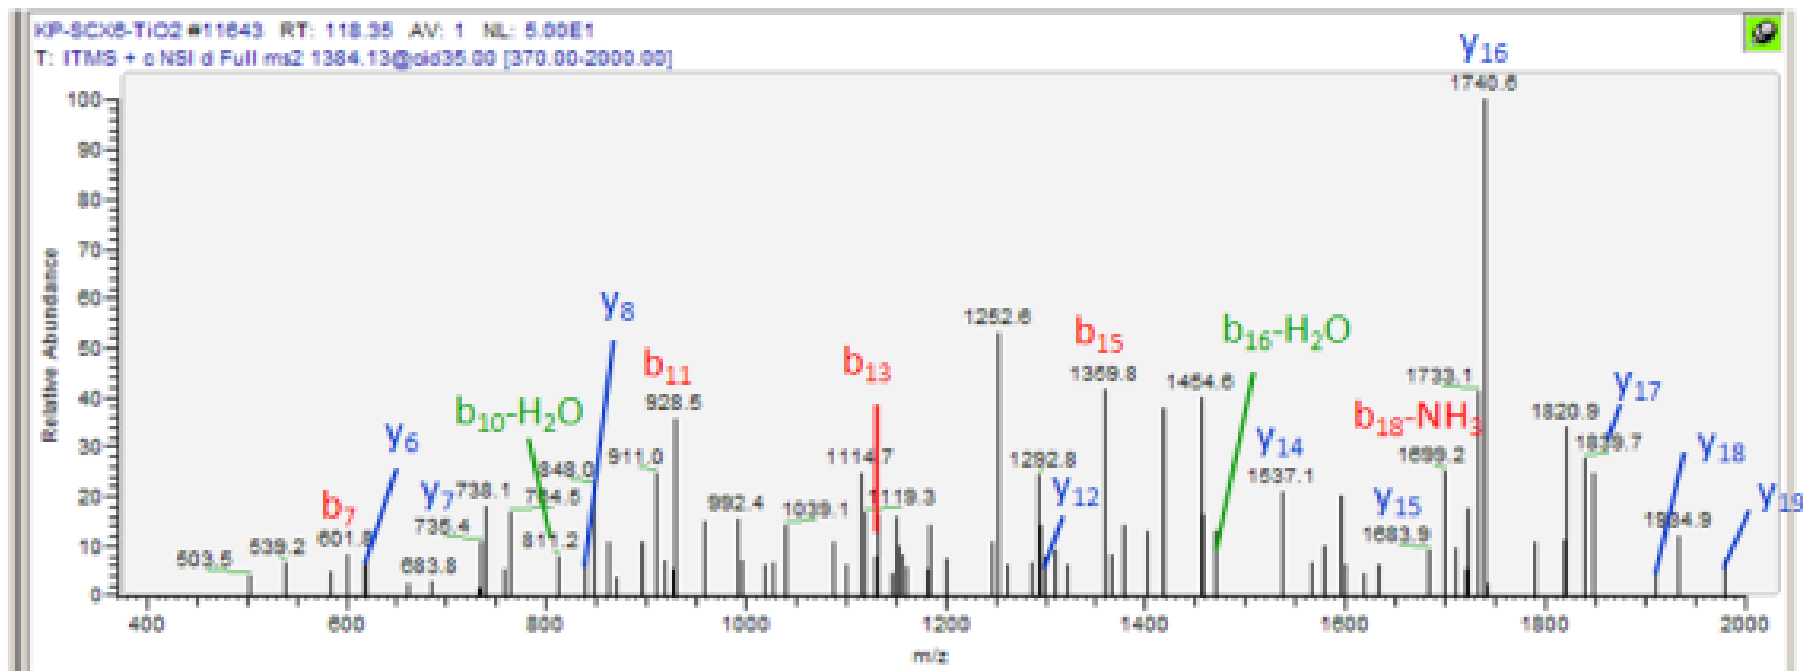



fimA

LATAGSp[TS]SAVGFNIQLDDCDTTVATK

KP-SCX6-TIO2 #11130 RT: 113.05 AV: 1 NL: 7.36E1  
T: ITMS + e NSI d Full ms2 1384.63@cid35.00 [370.00-2000.00]

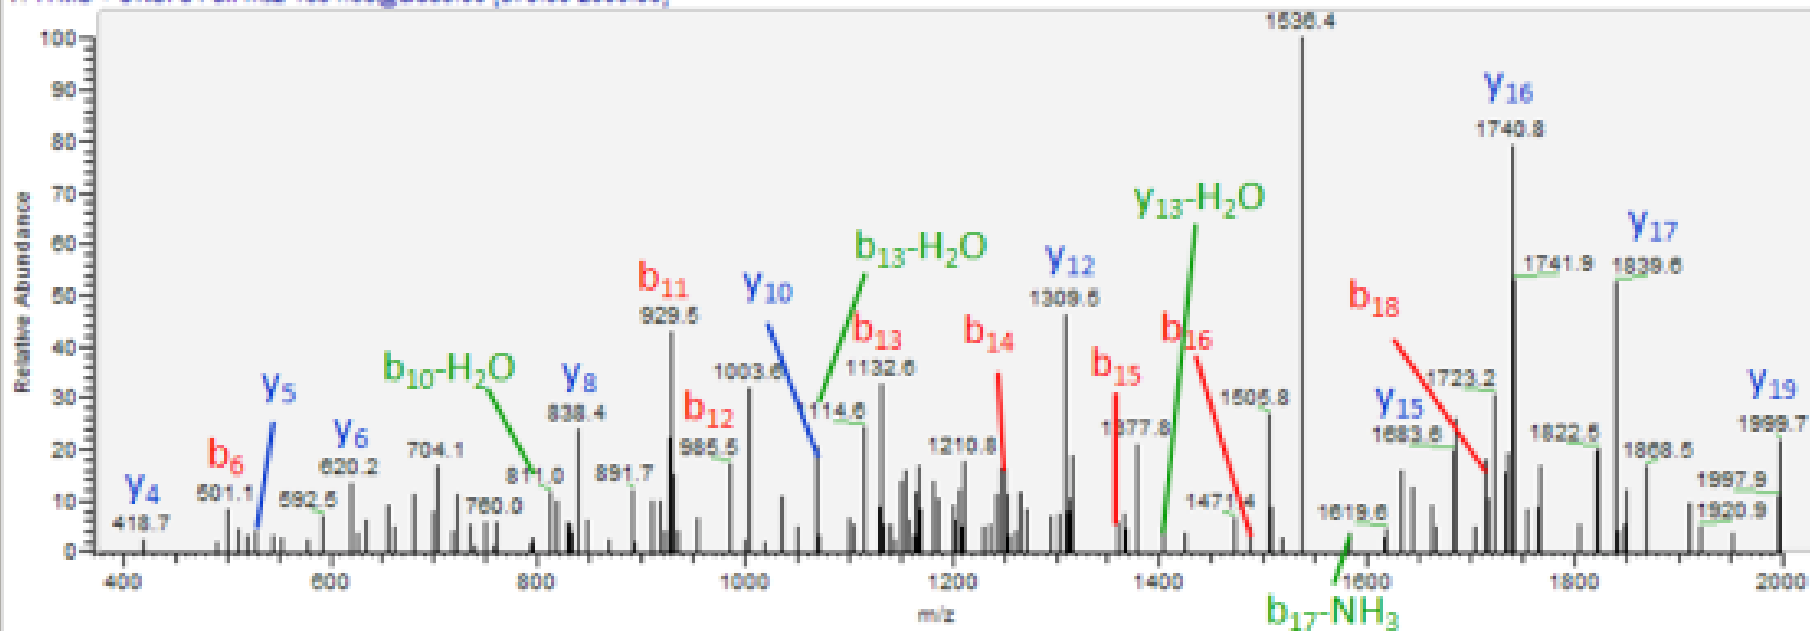

fimA

LApTAGSTSSAVGFNIQLDDCDTTVATK

HP-SCX15-TiO2 #12714 RT: 118.13 AV: 1 NL: 7.31E1

T: ITMS + eNSI d Full ms2 1384.83@cid35.00 [370.00-2000.00]

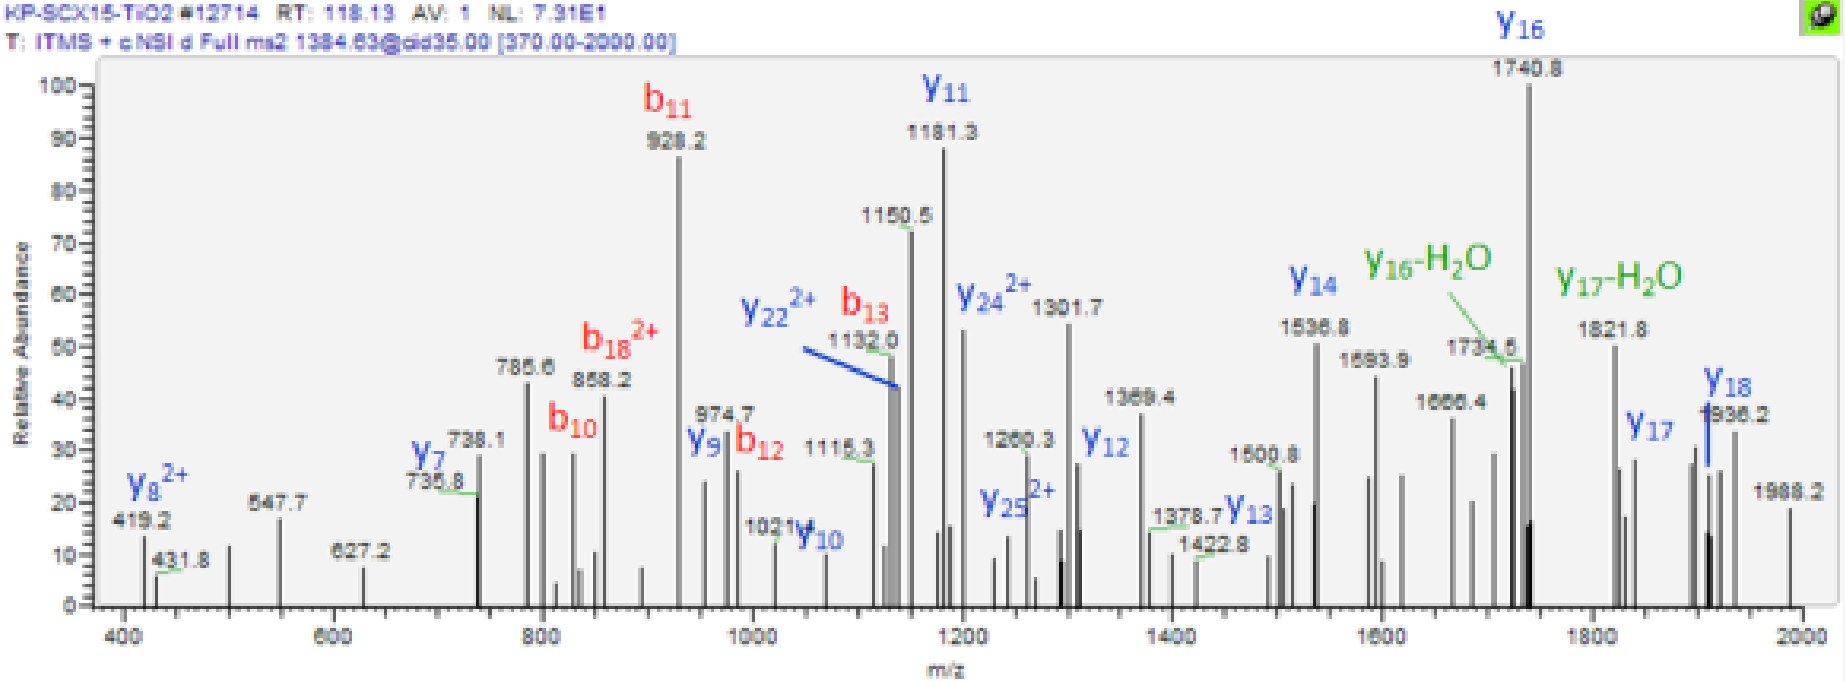

fimA

YpYATGAATAGIANADATFK

KP-SCX15-TiO2 #13519 RT: 125.72 AV: 1 NL: 1.88E2

T: ITMS + e NSI d Full ms2 979.45@cid35.00 [255.00-1970.00]

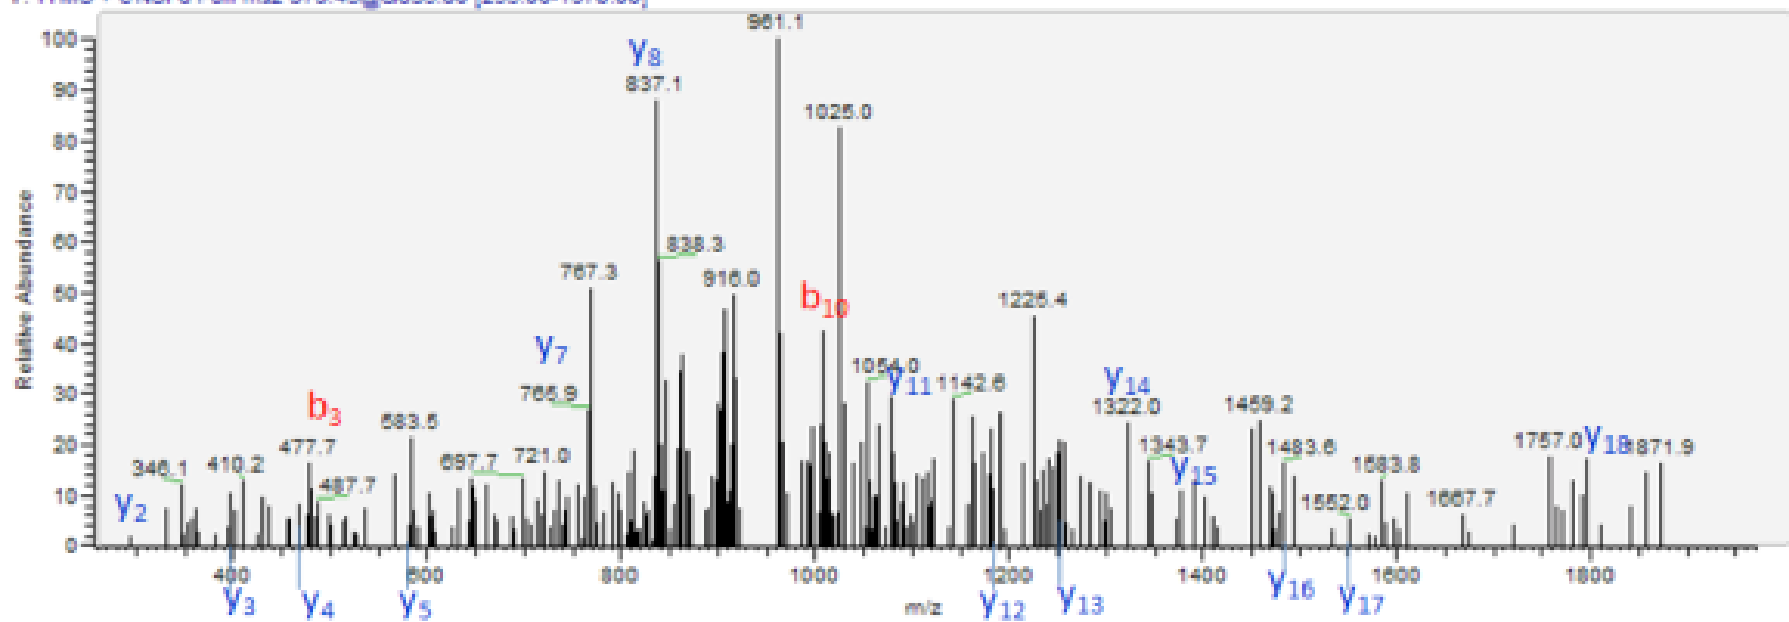

fimD

DVpTFQADAQGHGLSPCLTR

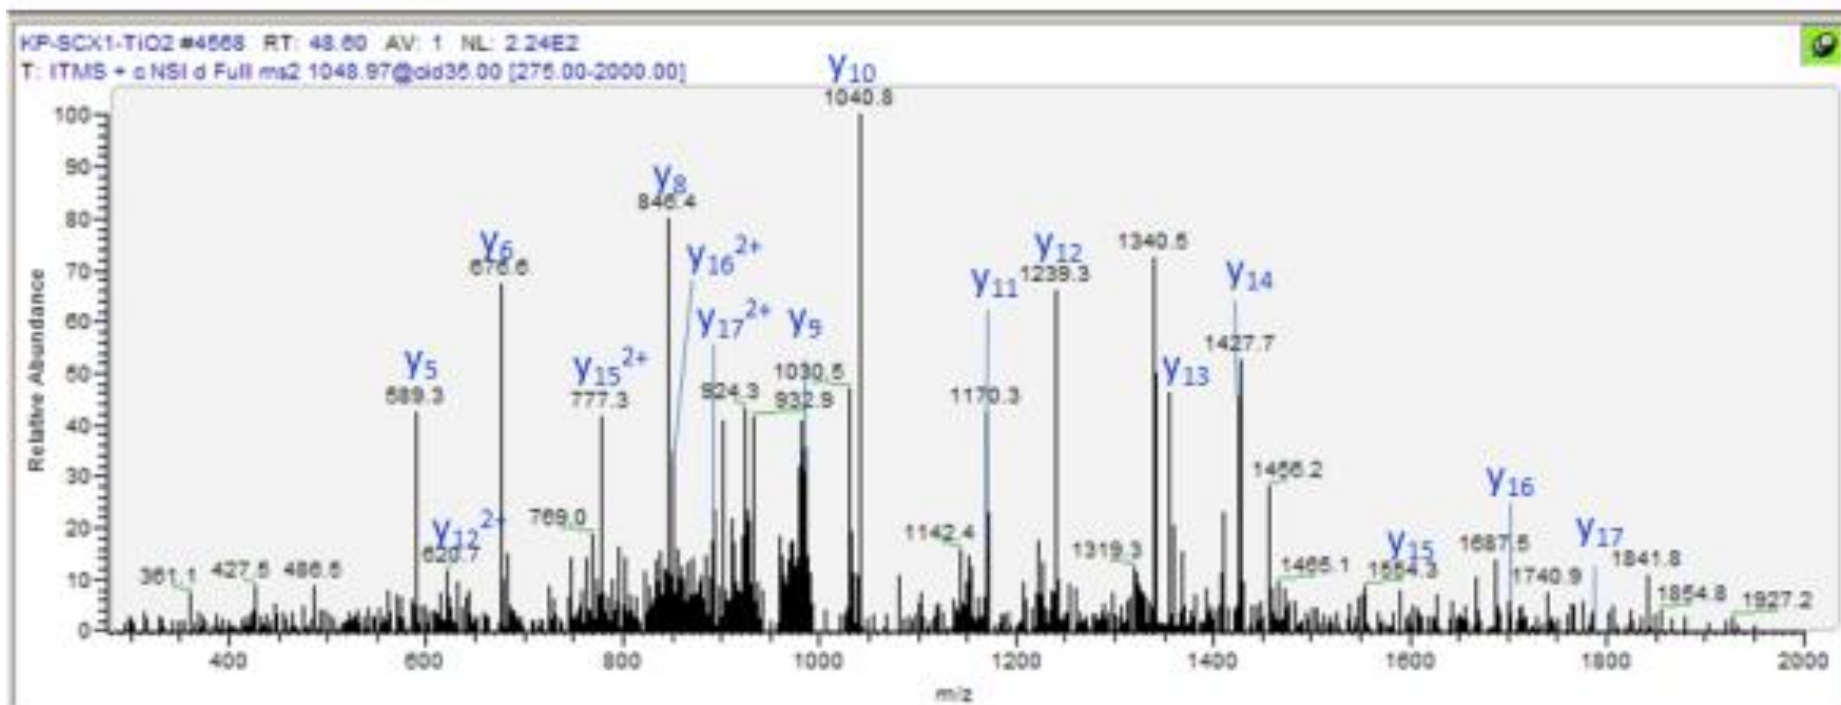

frdA

EPIPVRP[TAH]YTMGGIETDQQCETR

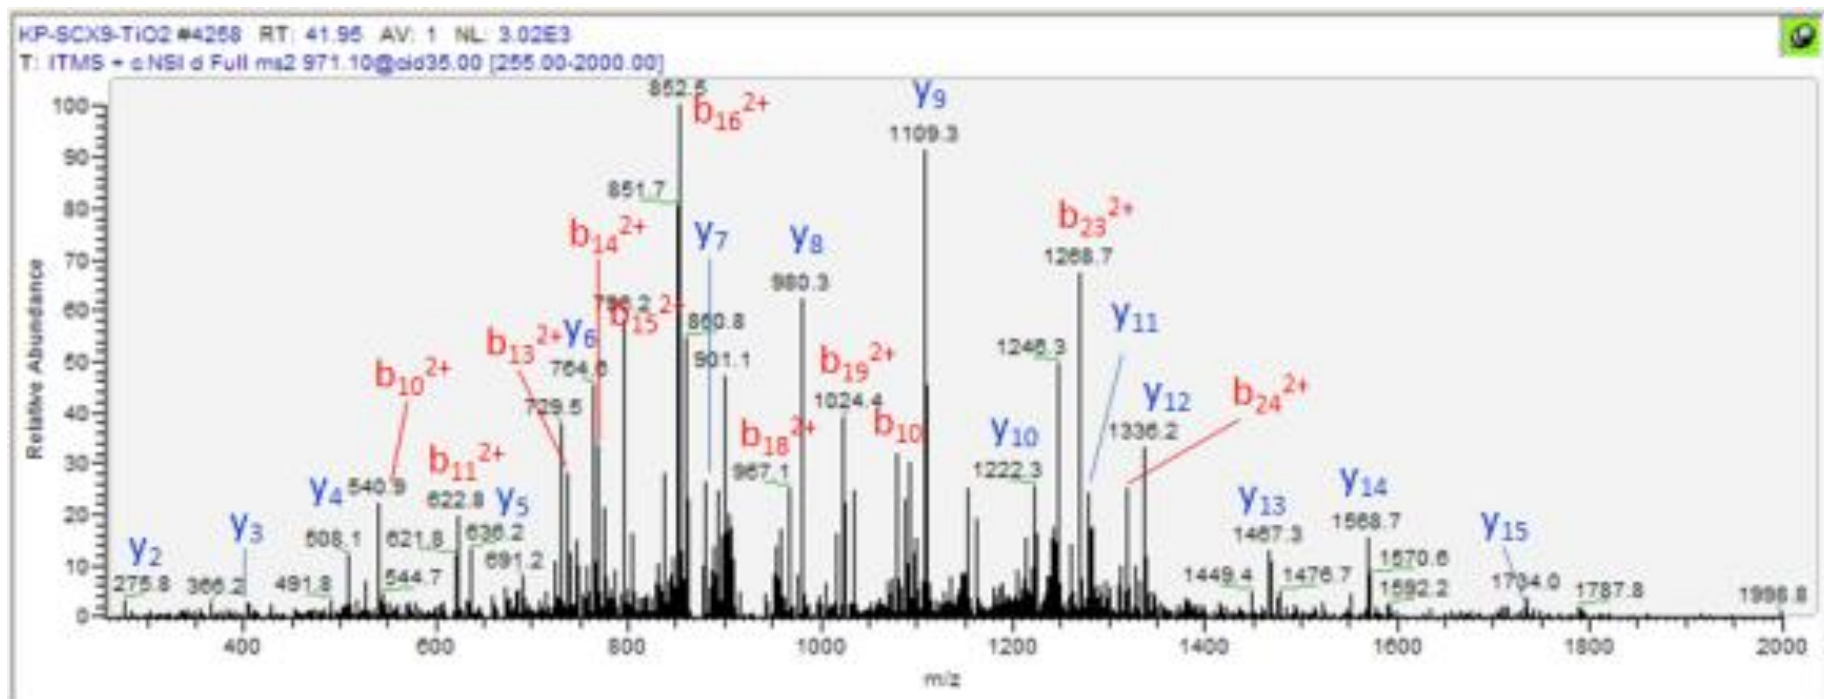

ftsA

pHGALGSIVGKDENVVPSVGGRRPPR

KP-SCX8-T102 #4774 RT: 45.42 AV: 1 NL: 5.60E3  
T: ITMS + e NSI d Full ms2 904.44@cid35.00 [235.00-2000.00]

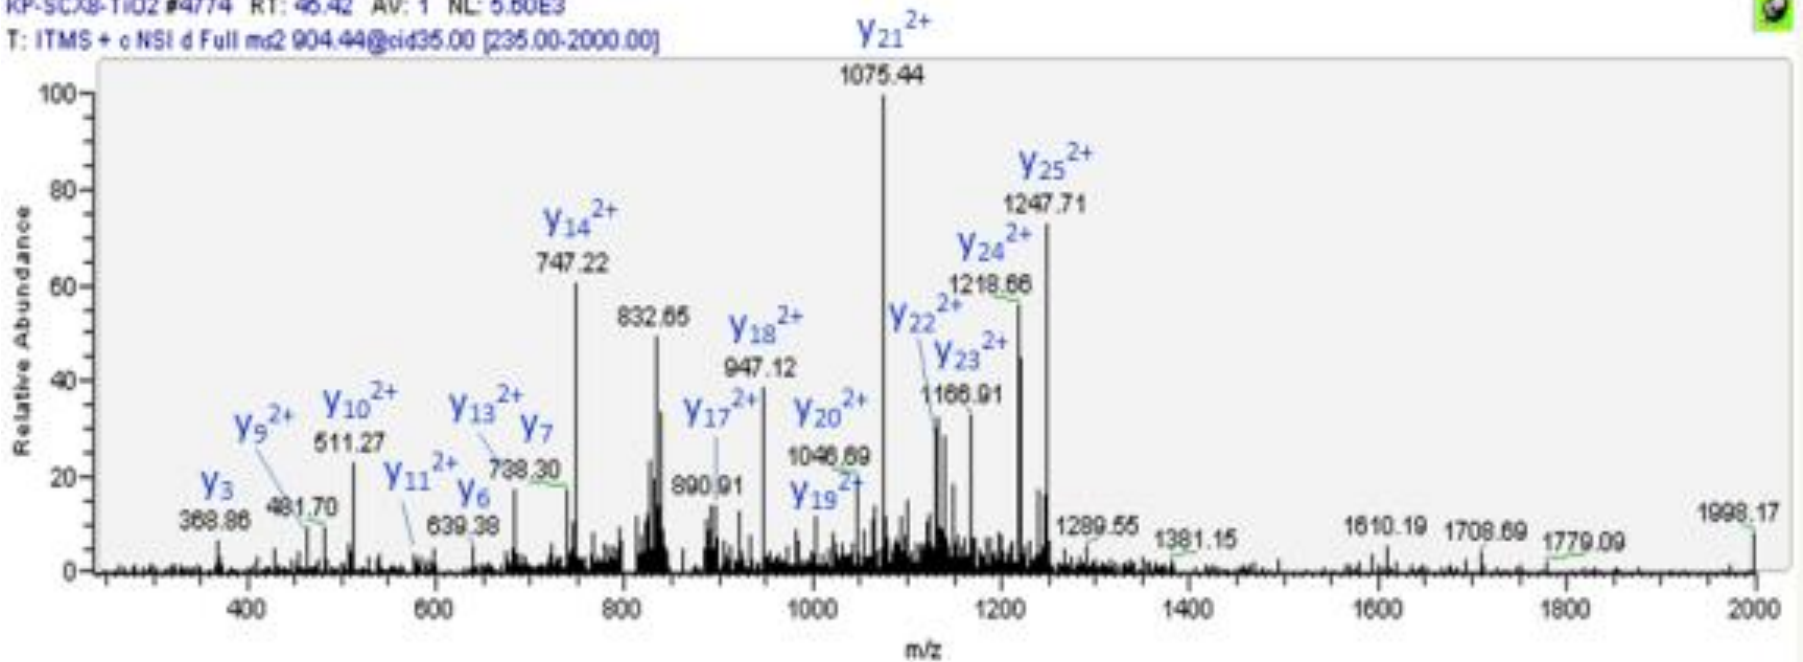

ftsA

HISCQNEIGMVPIpSEEEVTQDDVENVVHTAK

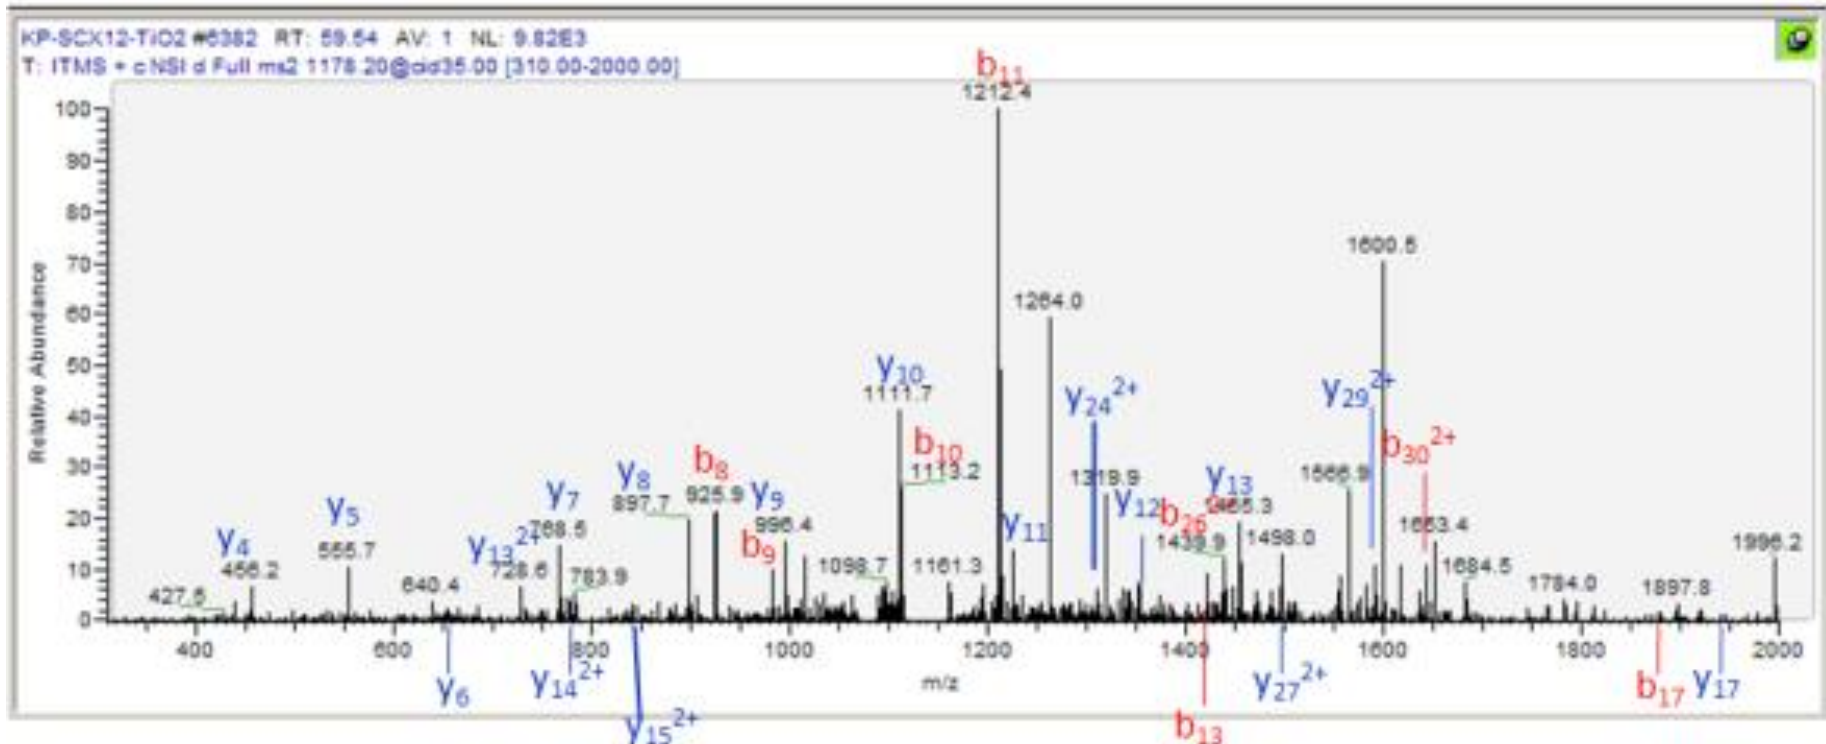

ftsA

pHISCQNEIGMVPISSEEVTTQDDVENVVHTAK

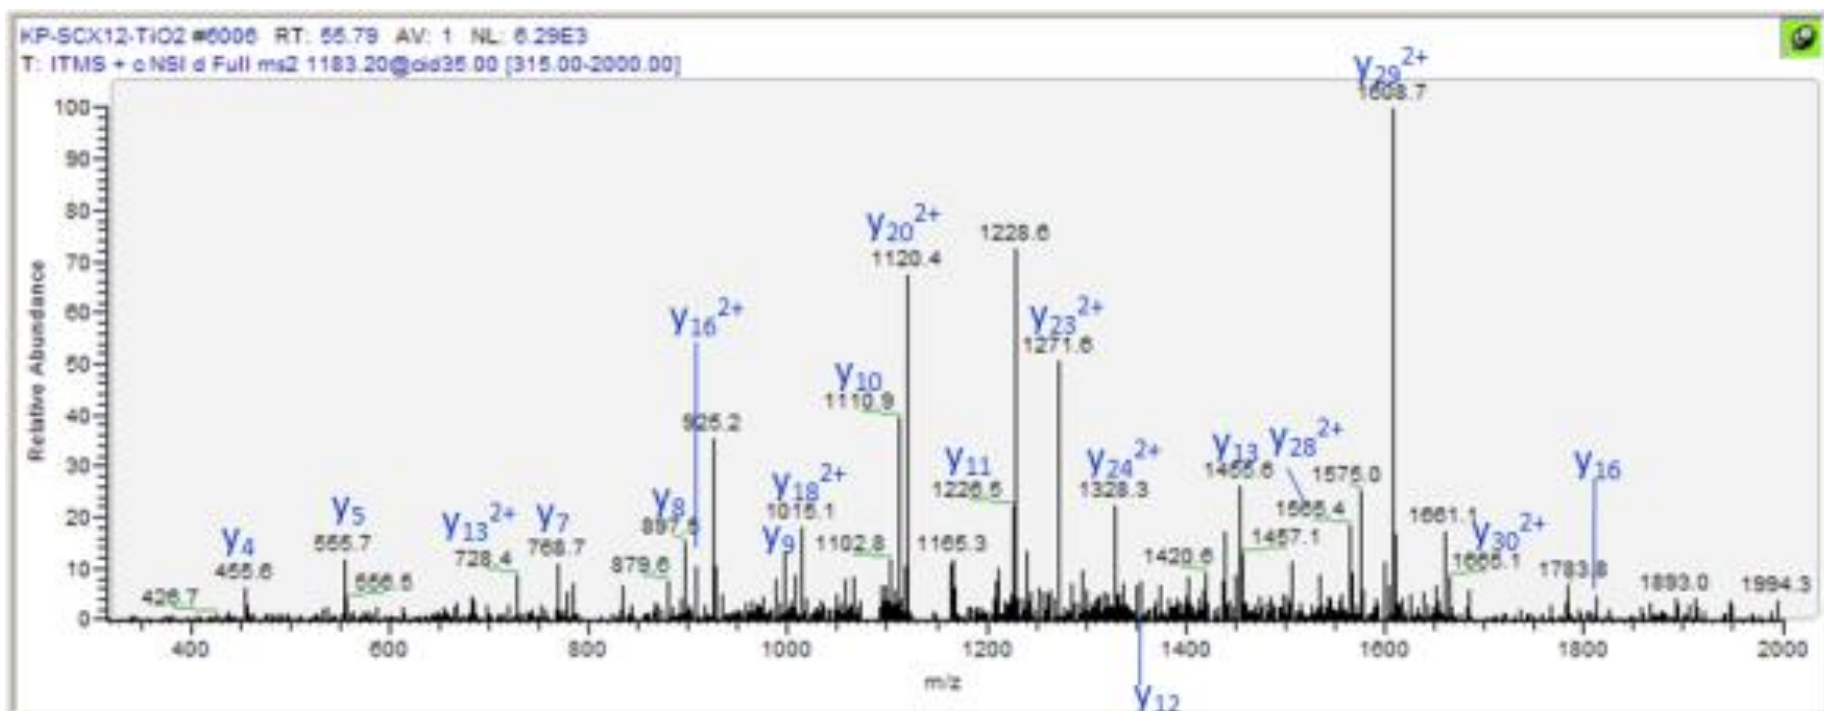



gabT

ALCpDEHGIMLIADDEVQSGAGR

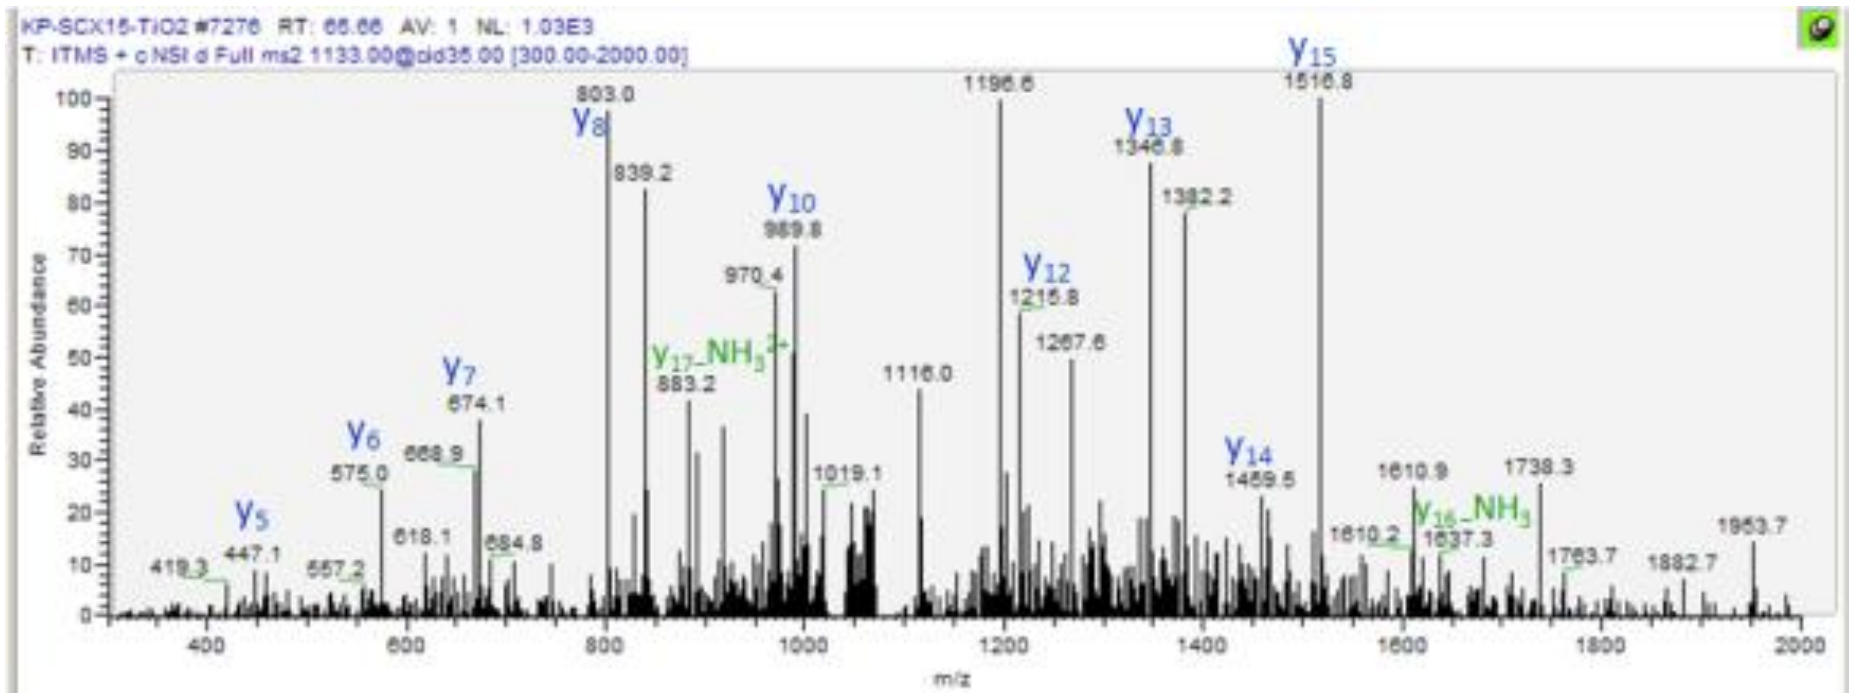

galU

GLGHAVLCAHPVVGDEPVAVILPDVILDEpYESDLR

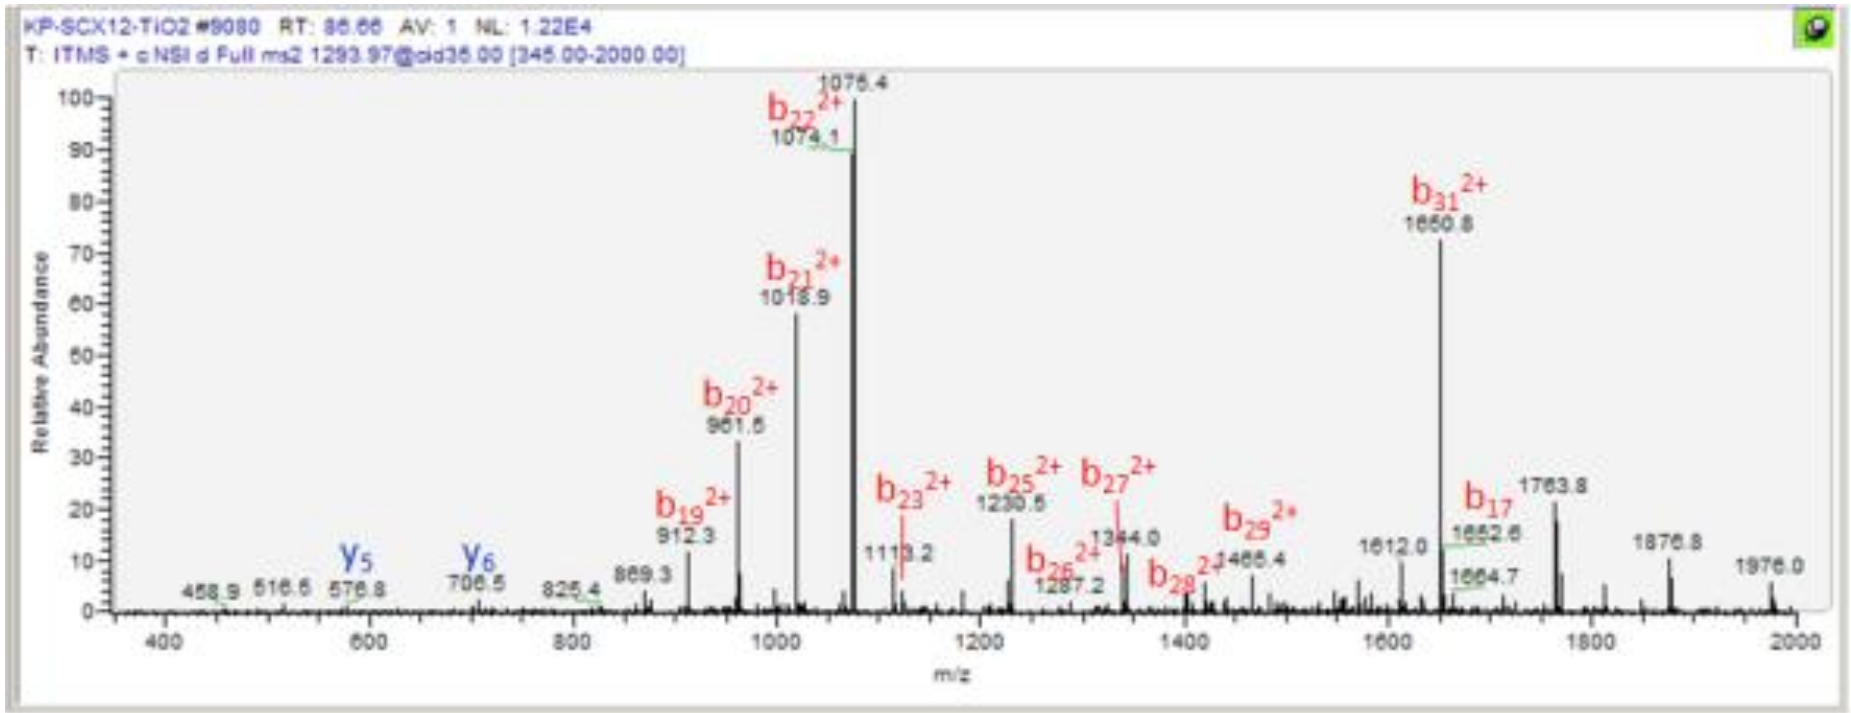

gcvT  
AQQpTPLYEQHTLCGAR

HP-SCX15-TiO2 #4029 RT: 37.73 AV: 1 NL: 4.82E3  
T: ITMS + c NSI d Full ms2 948.93@cid35.00 [250.00-1910.00]

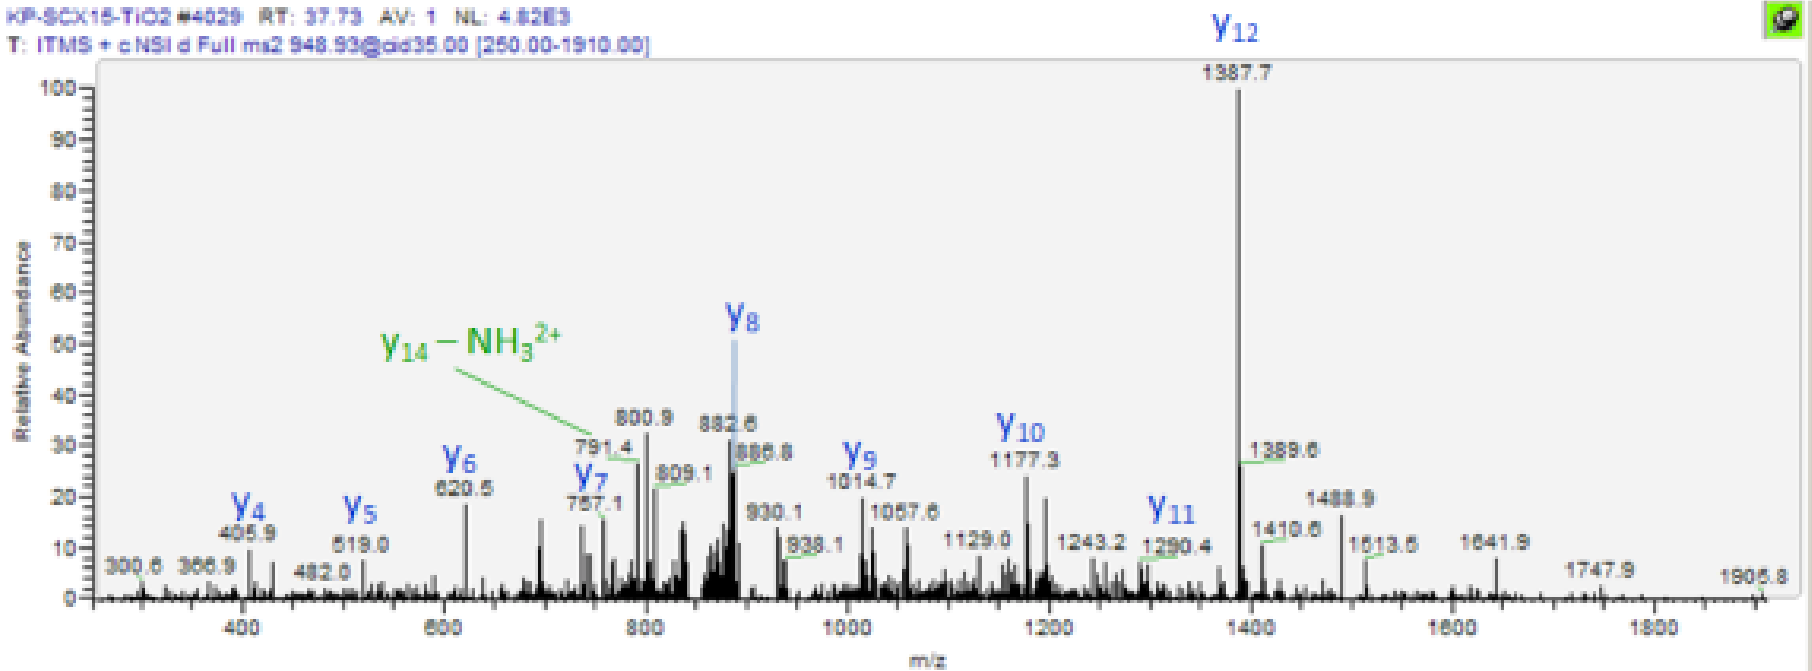

gldA

p[SLAD]AGLAAEIAPFGGEC SHNEINR

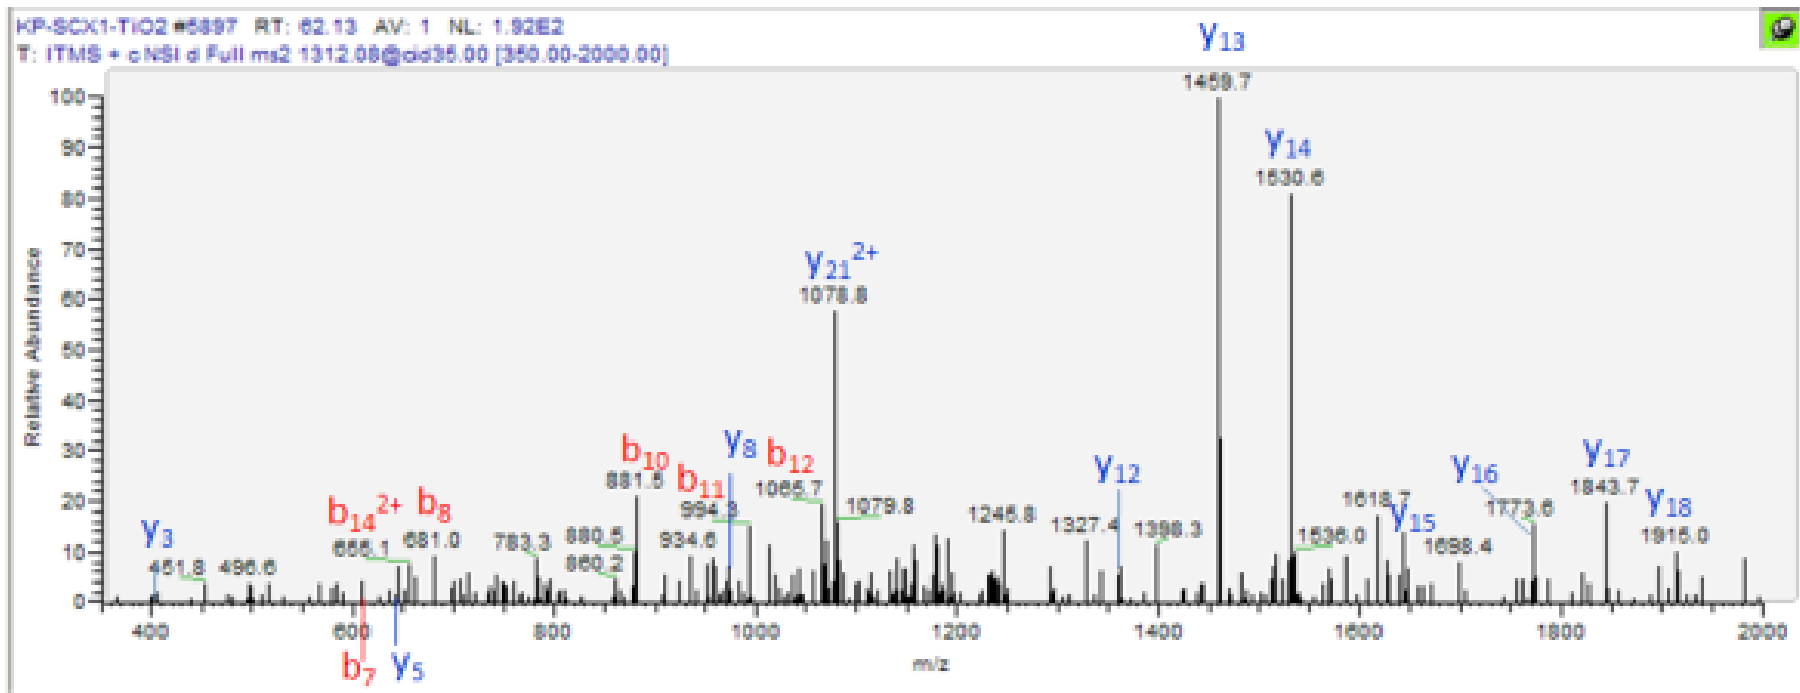

glpK  
AVT**p**STHGLLLTIACGPR

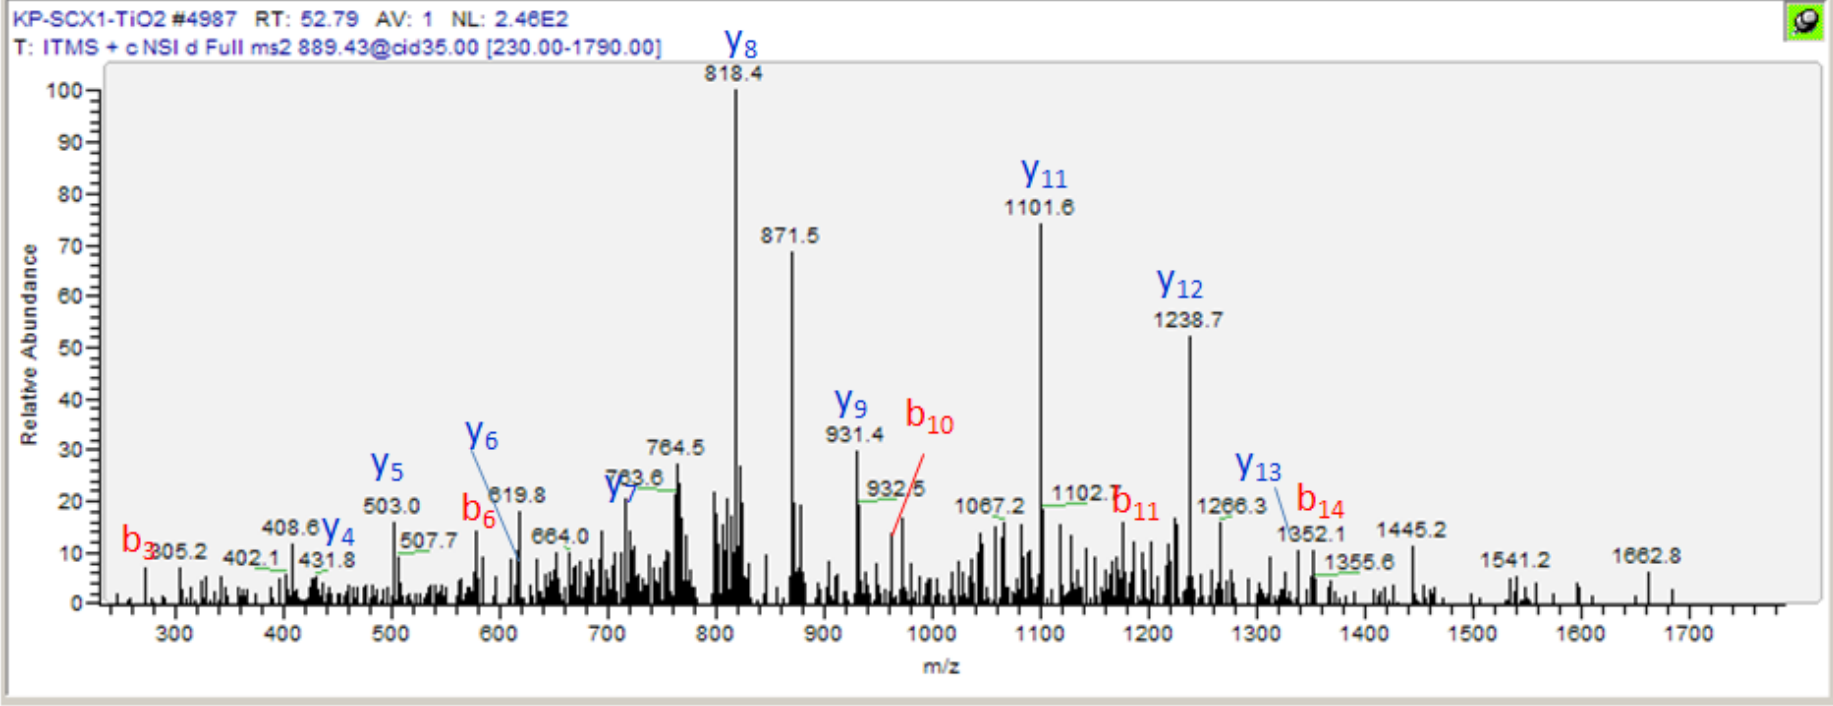

glpK

AVp[TSTH]GLLTTIACGPR

KP-SCX2-TiO2 #5135 RT: 53.06 AV: 1 NL: 2.78E2  
T: ITMS + c NSI d Full ms2 889.43@cid35.00 [230.00-1790.00]

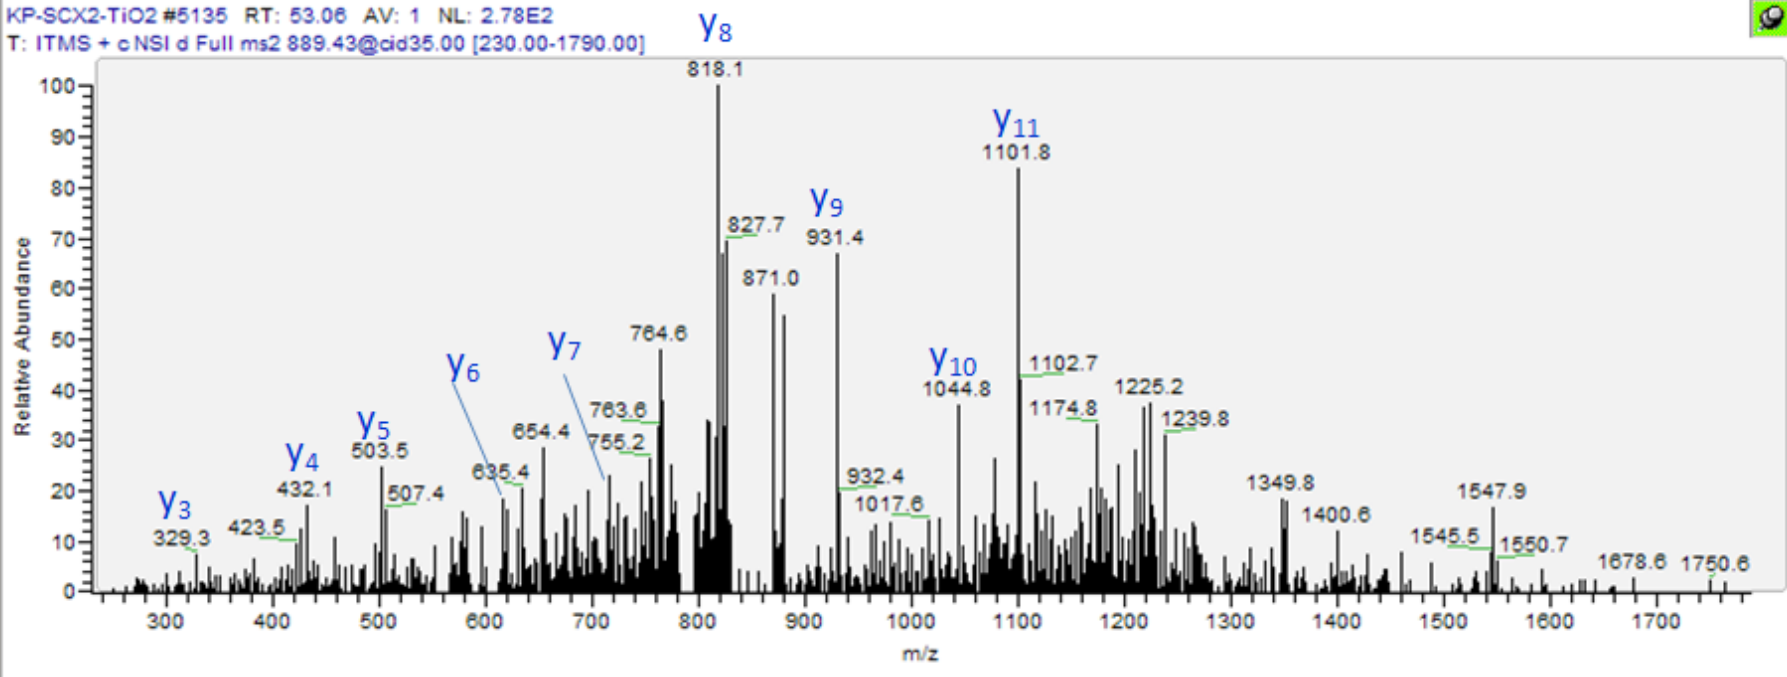

glpK  
AVpTSTHGLLTTIACGPR

KP-SCX10-TiO2 #5234 RT: 50.81 AV: 1 NL: 6.67E2  
T: ITMS + c NSI d Full ms2 889.43@cid35.00 [230.00-1790.00]

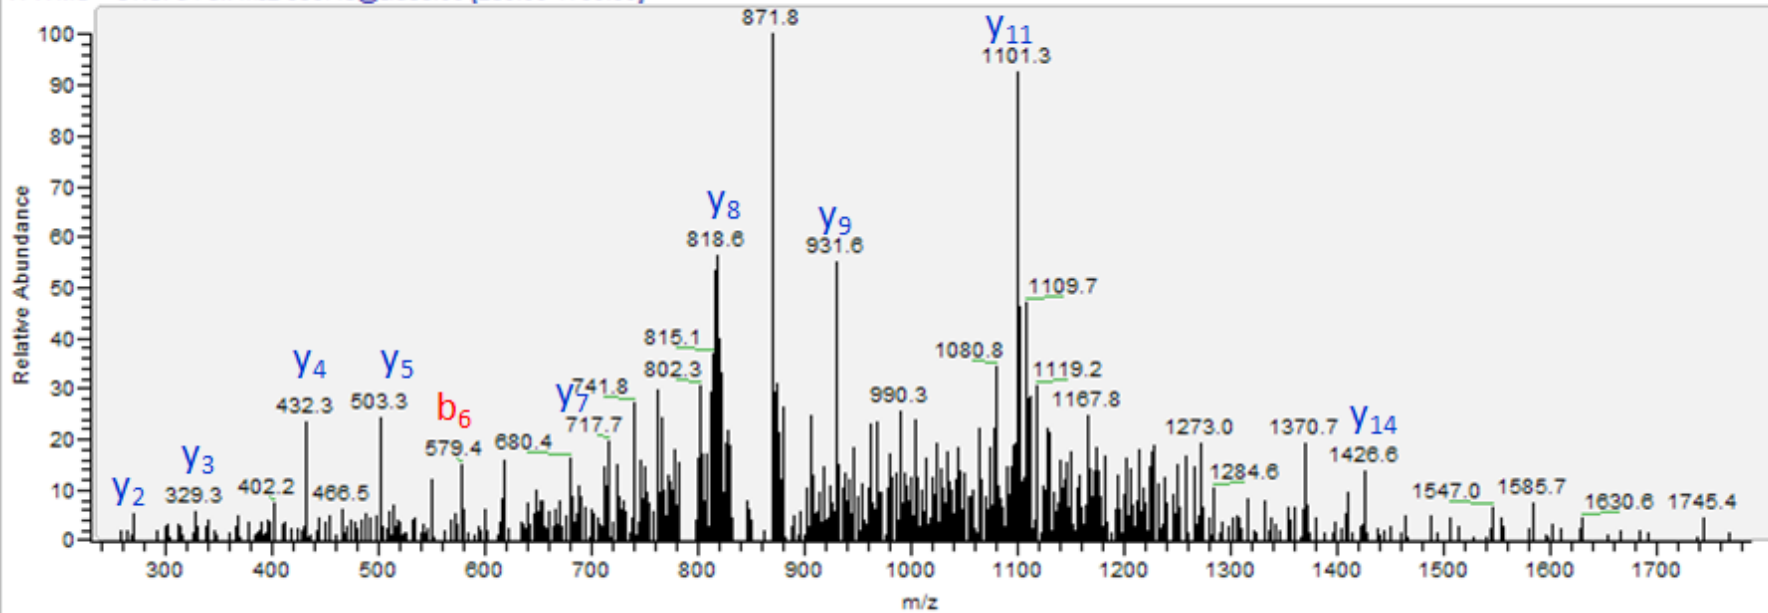

gltA

p[DSH]PMAVMCGITGALAAFYHDSLVDVNNPR

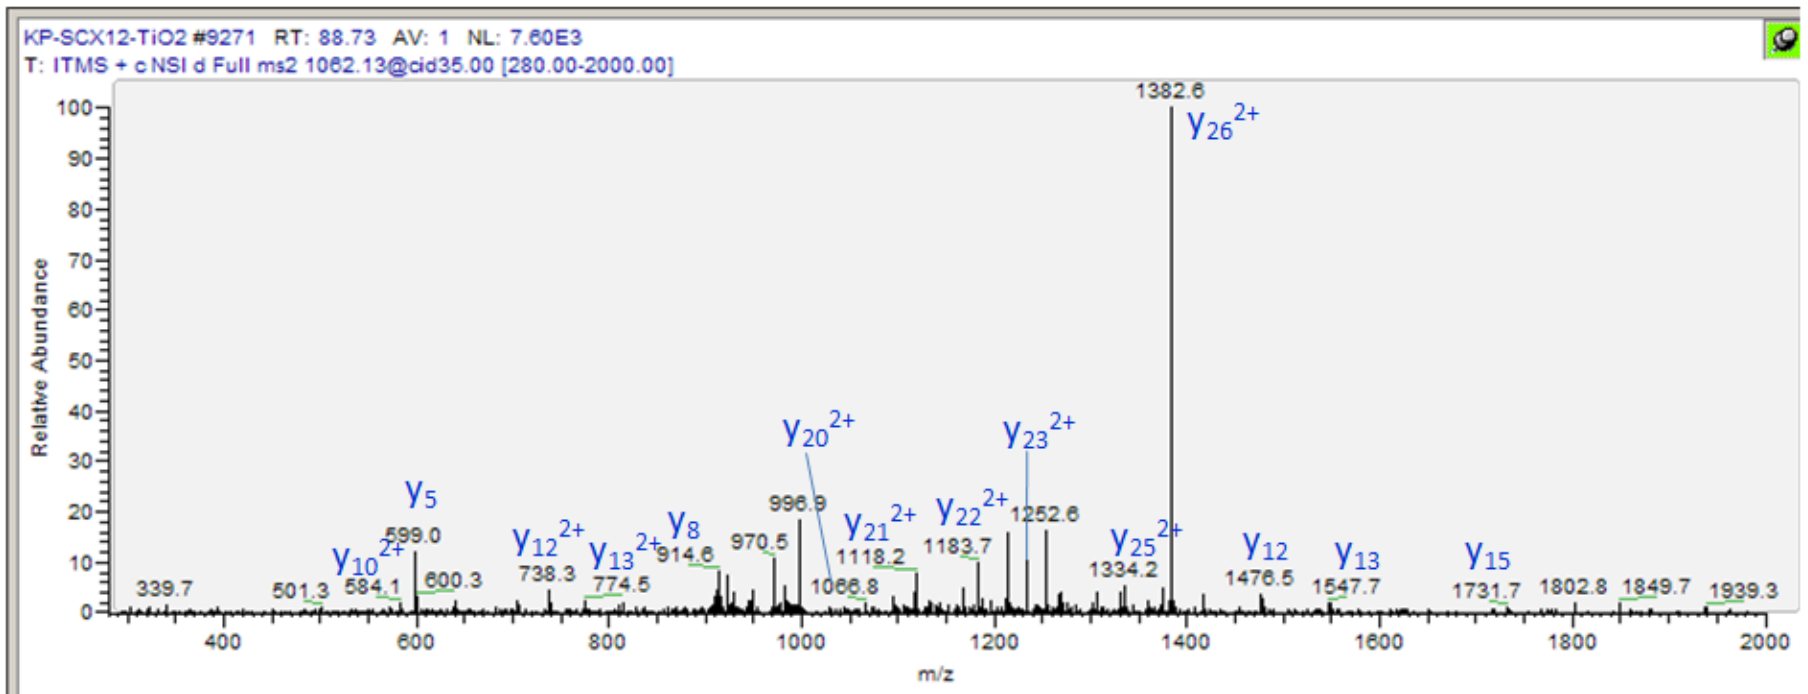



gltA

DSHPMAVMCGI**p**TGALAAFYHDSLVDVNNPR

KP-SCX15-TiO2 #8285 RT: 74.50 AV: 1 NL: 5.31E3

T: ITMS + c NSI d Full ms2 1072.80@cid35.00 [285.00-2000.00]

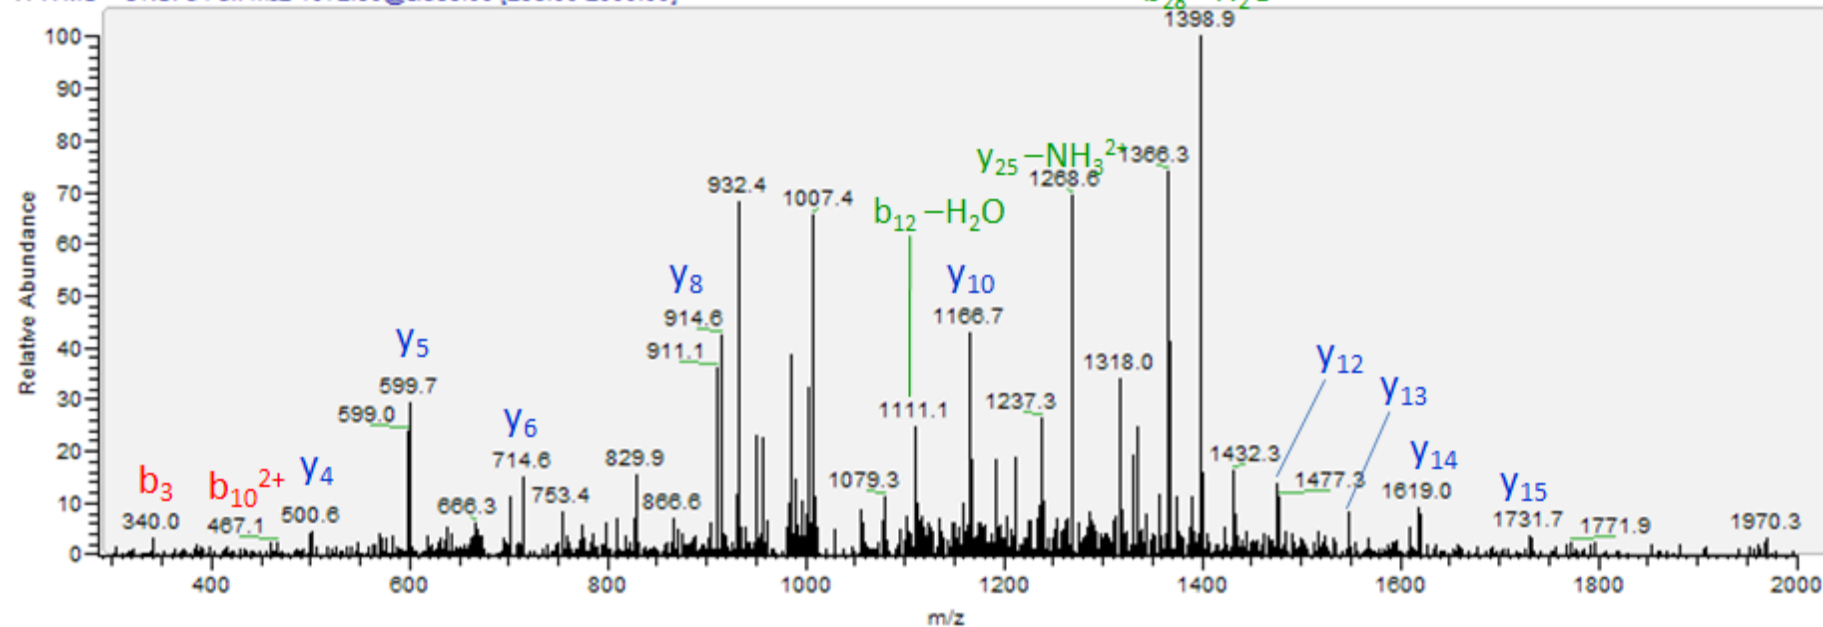

gpmA

pHGESQWNNENR

KP-SCX1-TiO2 #1611 RT: 20.08 AV: 1 NL: 2.79E2

T: ITMS + c NSI d Full ms2 725.77@cid35.00 [185.00-1465.00]

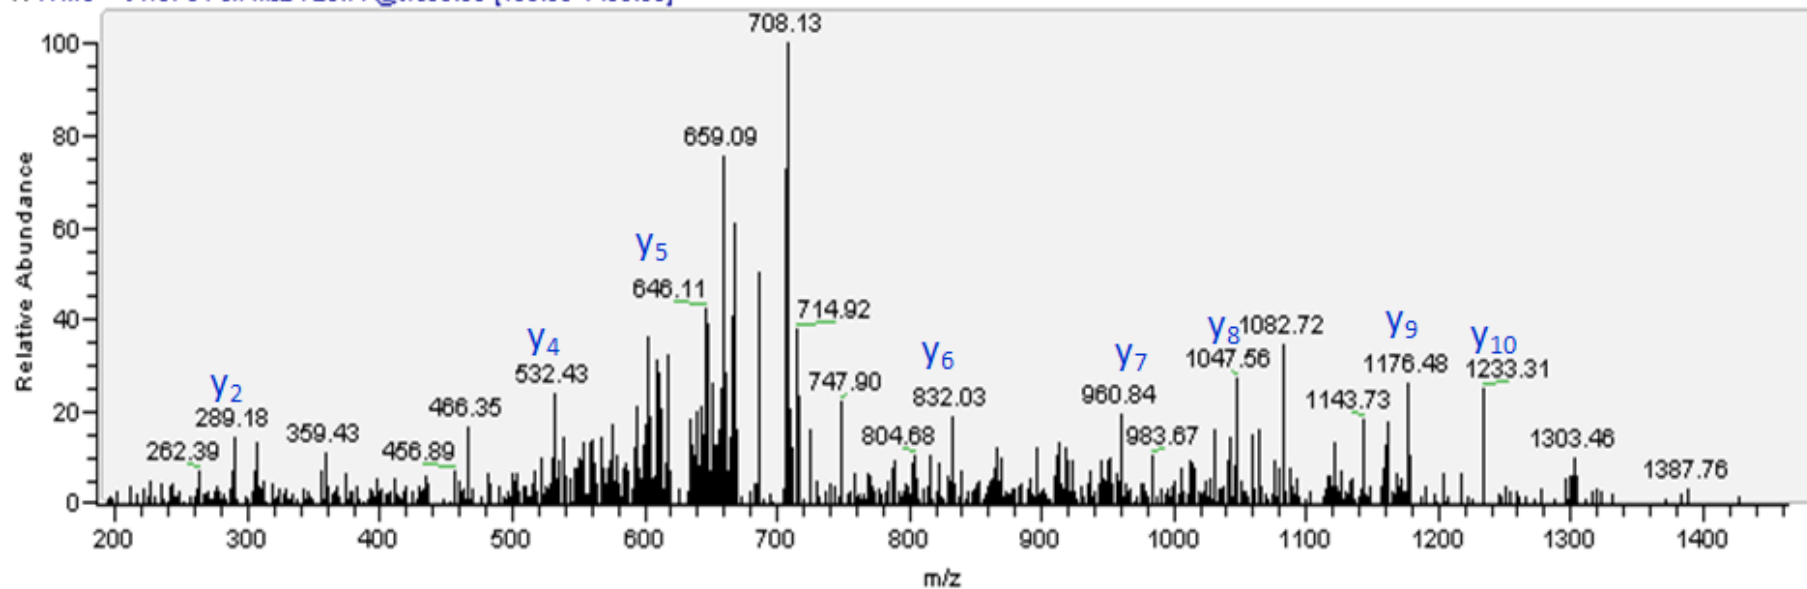

groEL

QIVSNAGEEPpSVVANNVK

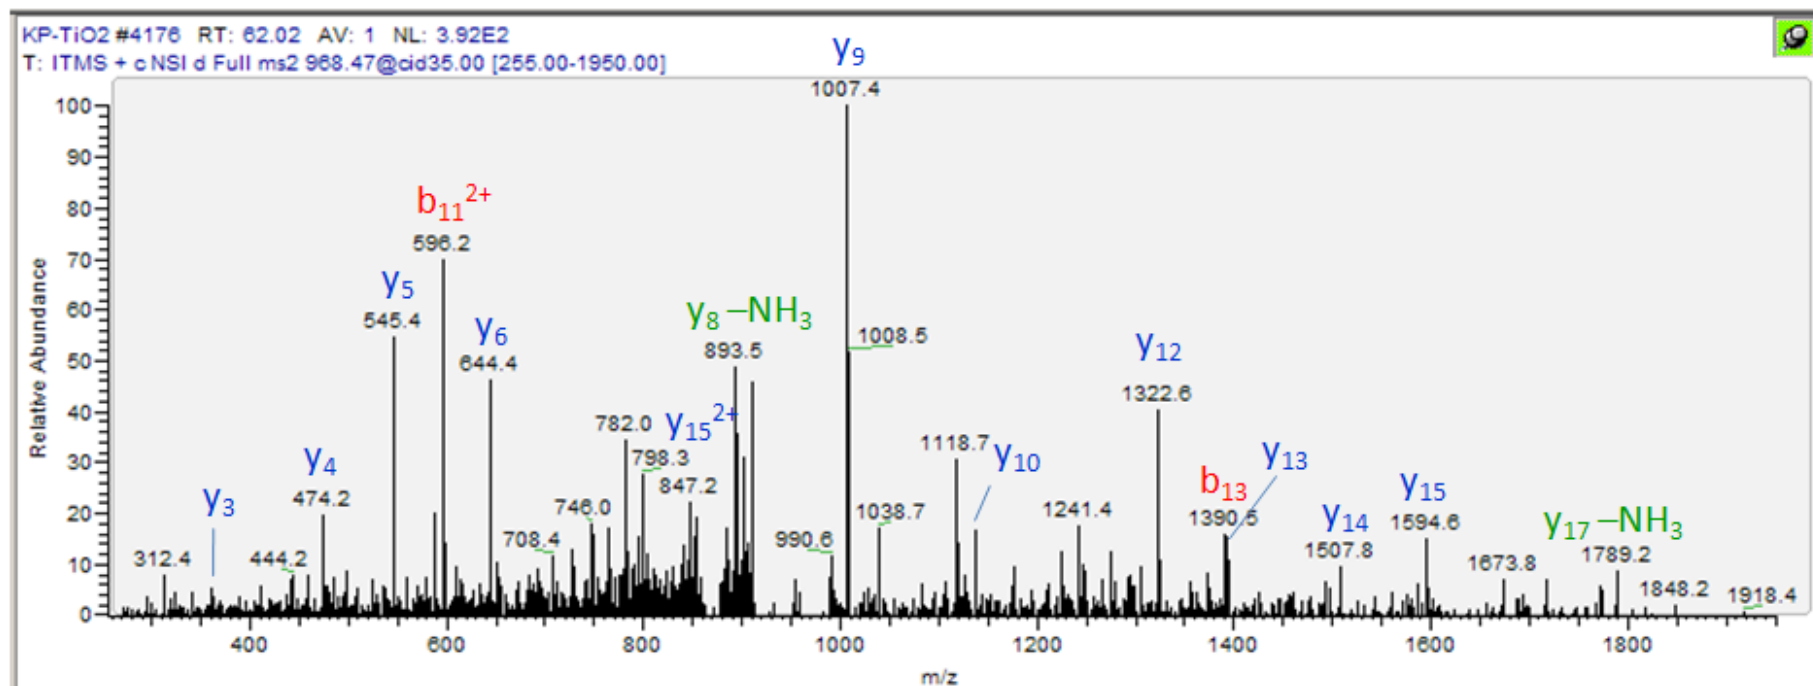

hfIB

REVRPPAGWEEp[SSNNS]DNNGTPR

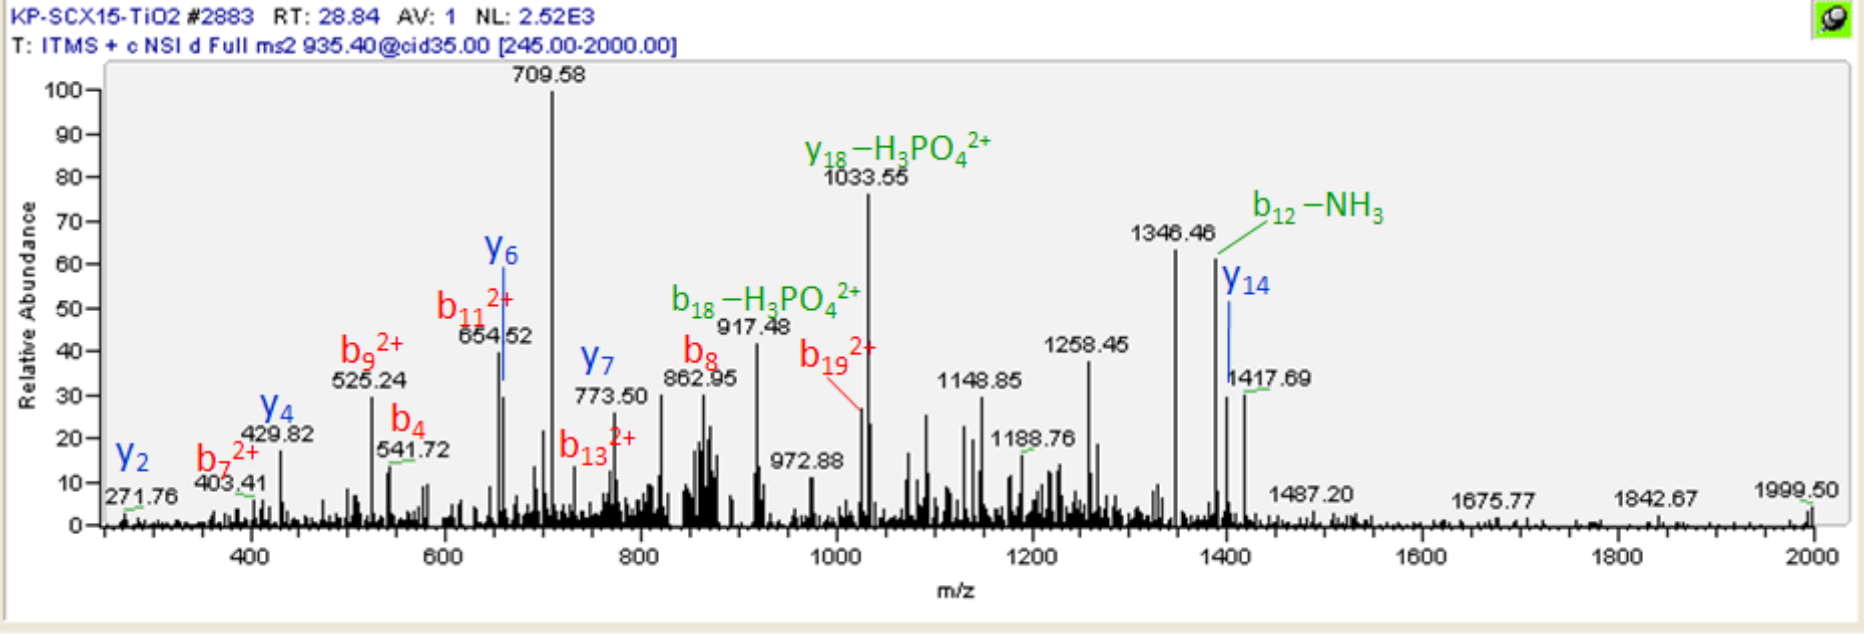

hisS

ApHFAGLCALLDDAGIR

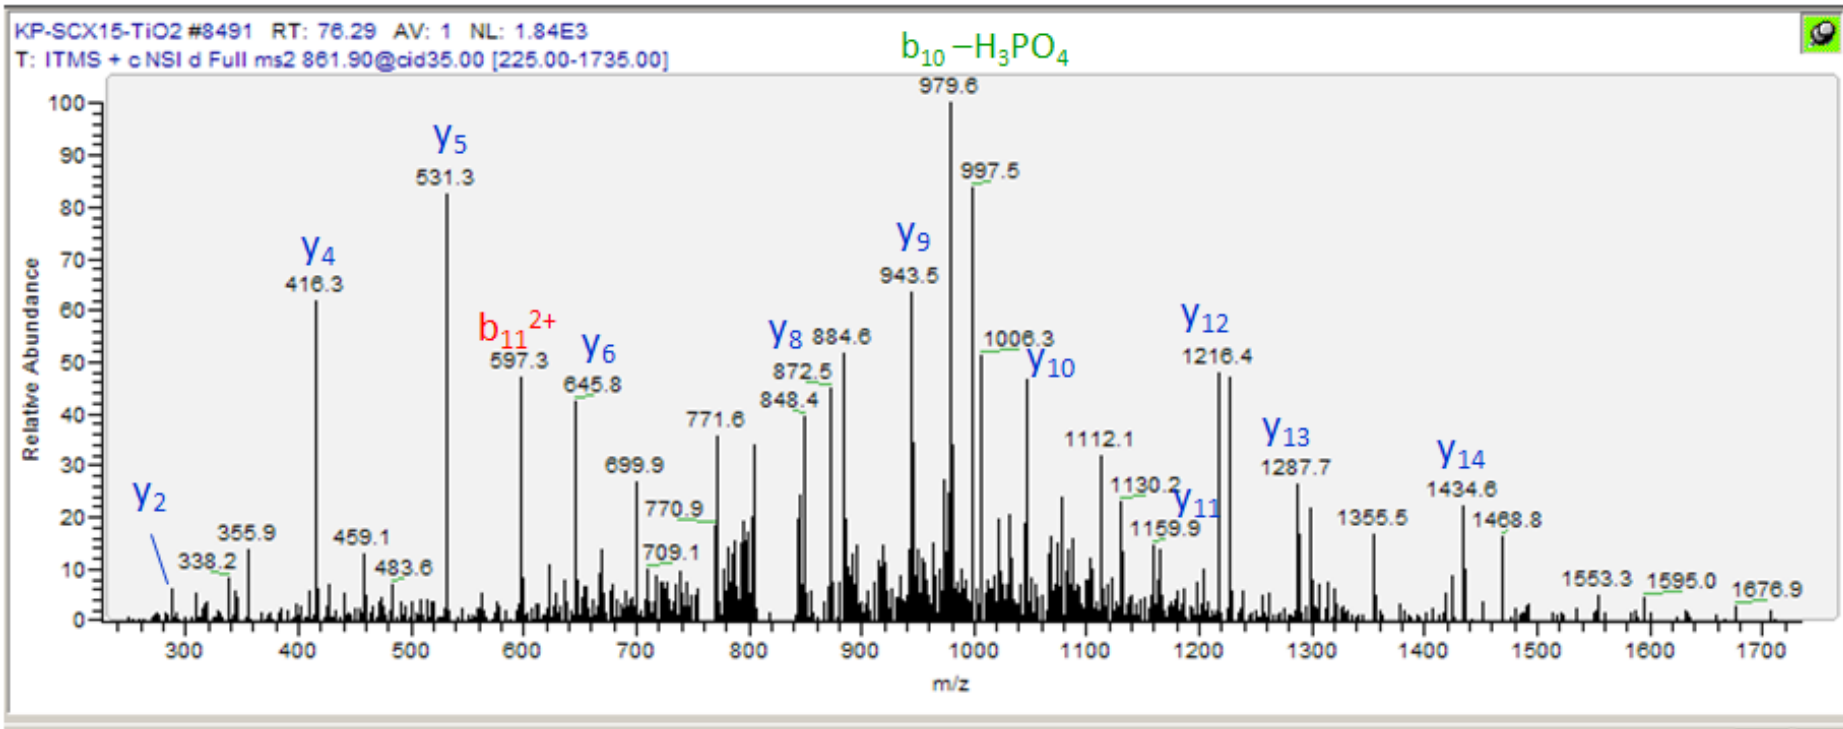

hutH

pHLLTDDSAISQSHHNSCK

KP-SCX14-TiO2 #2191 RT: 25.76 AV: 1 NL: 2.53E3

T: ITMS + c NSI d Full ms2 691.96@cid35.00 [180.00-2000.00]

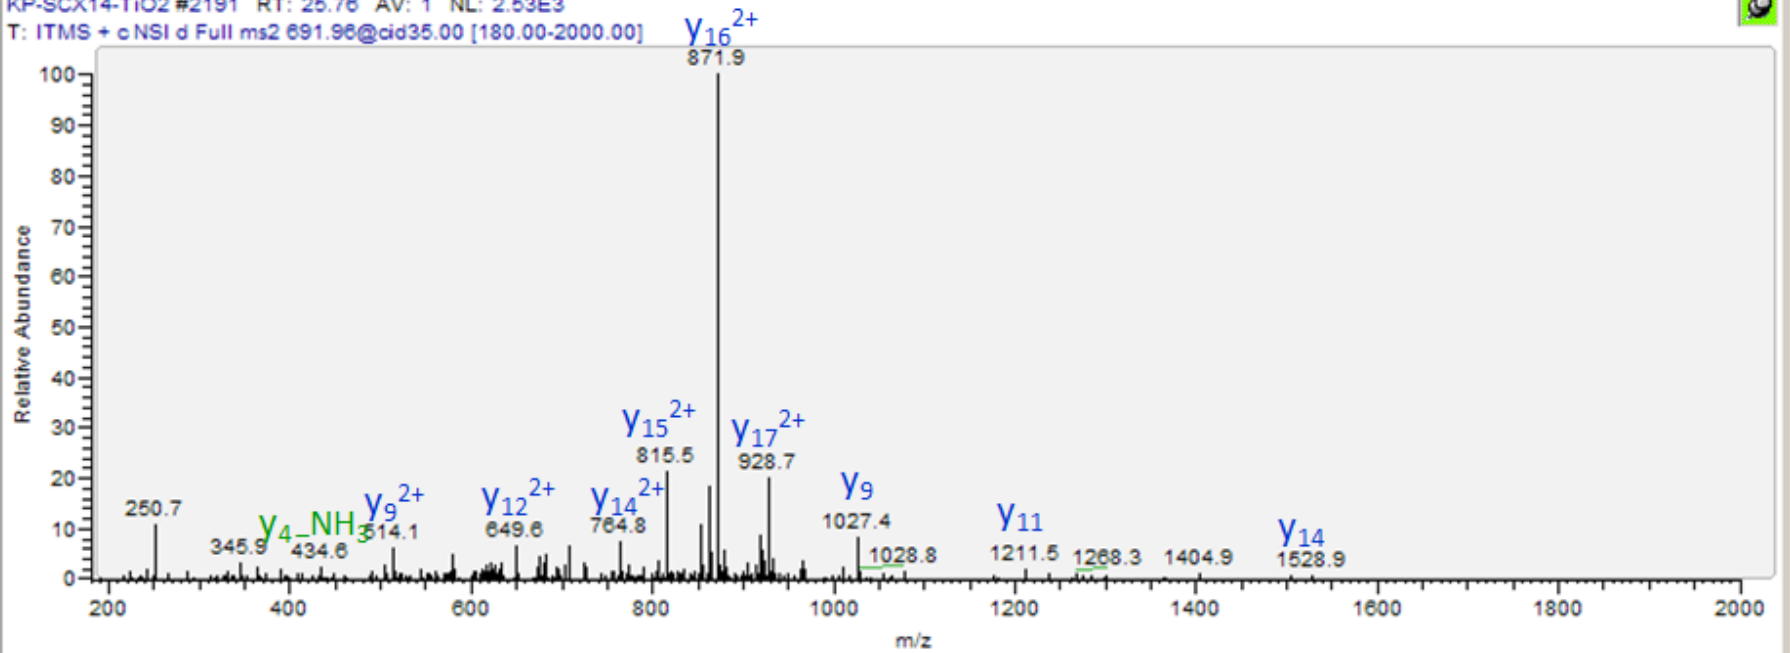

infB

NWpSETSDSPEDSSDYHVTTTSQHAR

KP-SCX15-TiO2 #3214 RT: 31.42 AV: 1 NL: 3.44E4

T: ITMS + c NSI d Full ms2 939.70@cid35.00 [245.00-2000.00]

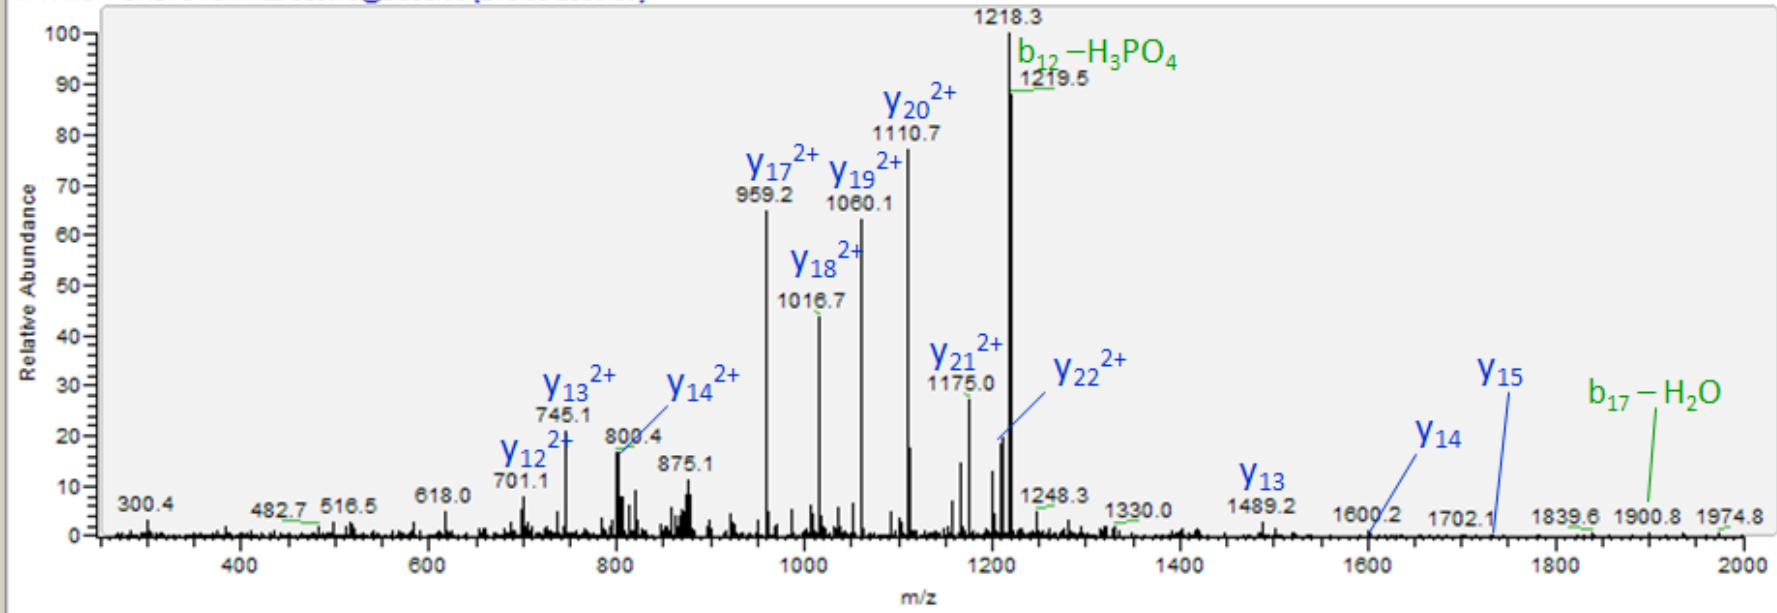

kbl

GpSHEYCDVMGR

KP-SCX15-TiO2 #3404 RT: 32.89 AV: 1 NL: 5.31E4  
T: ITMS + c NSI d Full ms2 667.23@cid35.00 [170.00-1345.00]

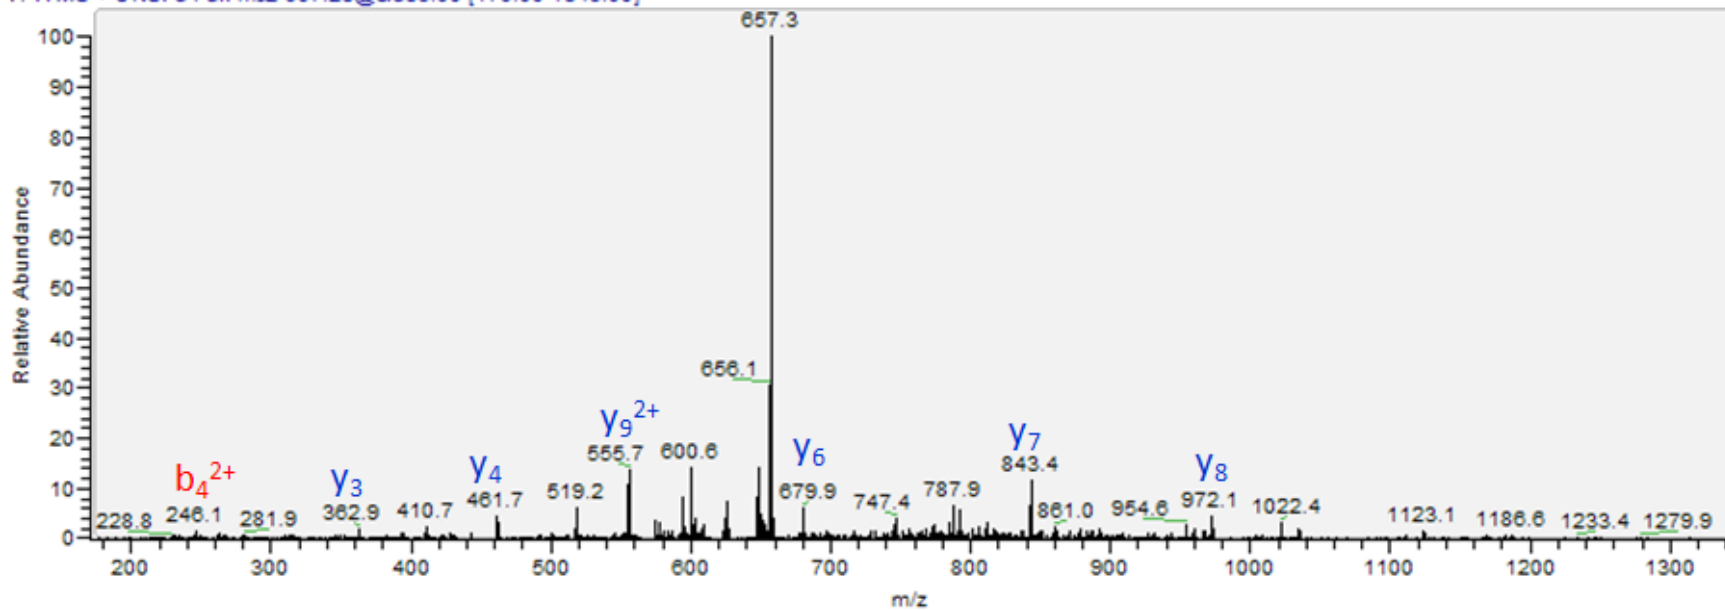



kdsA  
ApSNNSPVIFDVTHALQCR

KP-SCX5-TiO2 #6942 RT: 64.10 AV: 1 NL: 1.21E3  
T: ITMS + c NSI d Full ms2 1026.47@cid35.00 [270.00-2000.00]

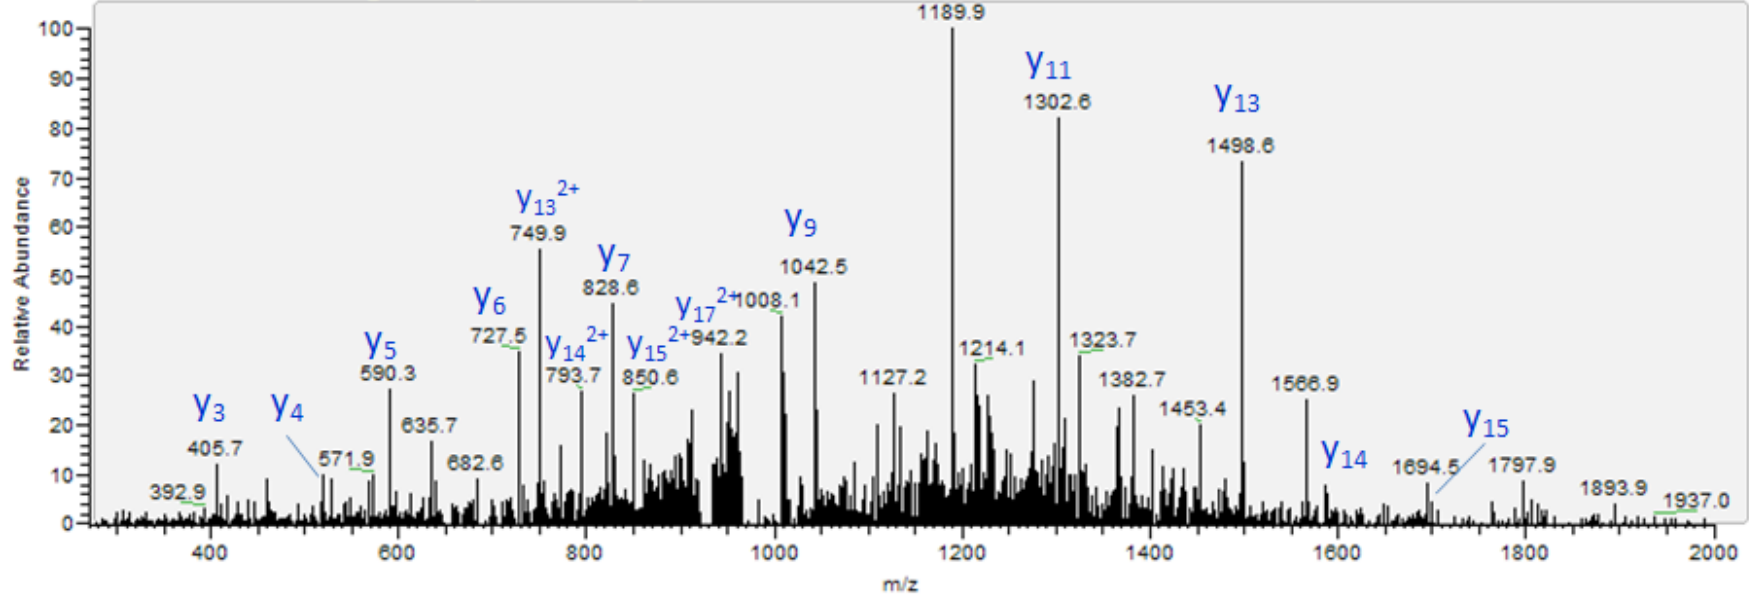

manB

GELGEELNEDIApYR

KP\_TiO2\_1214 #2157 RT: 41.63 AV: 1 NL: 1.08E2

T: ITMS + c NSI d Full ms2 844.36@cid35.00 [220.00-1700.00] Y<sub>12</sub><sup>2+</sup>

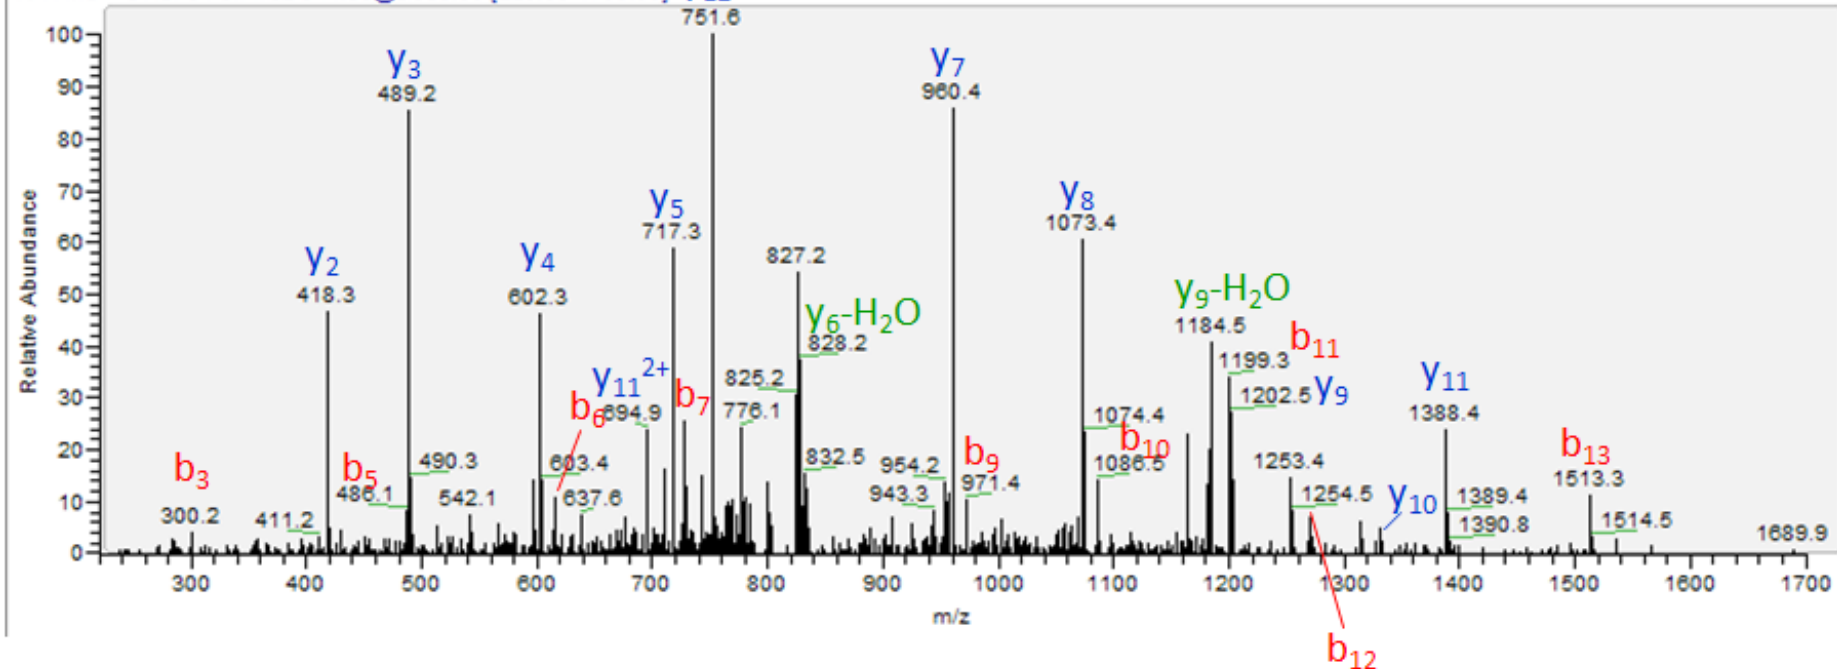

mlc

DALpYNGSLIR

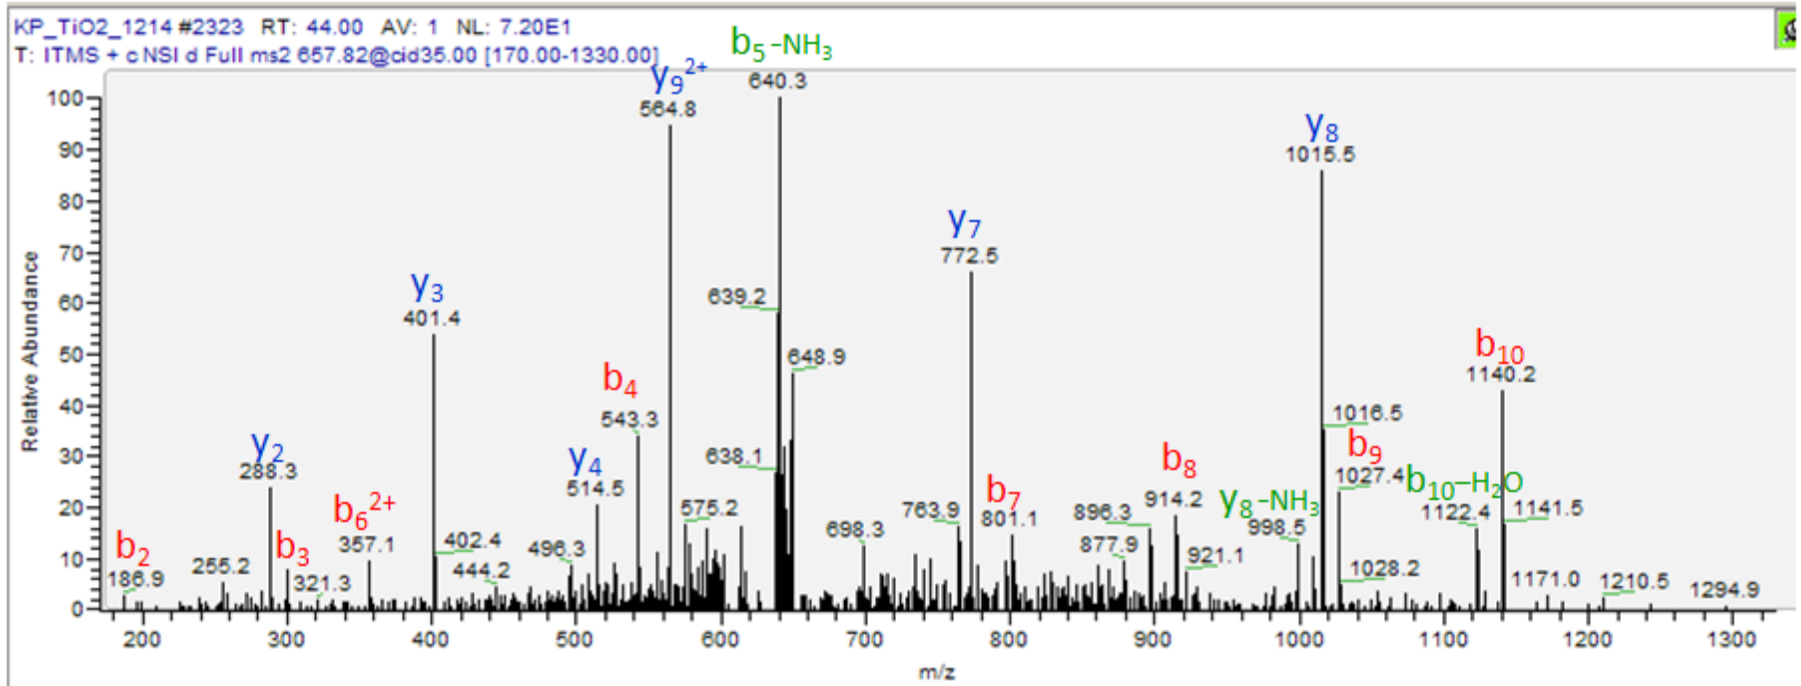

msrA  
EVCpSGQTGHAEAVR

KP-SCX1-TiO2 #1680 RT: 20.75 AV: 1 NL: 4.59E2  
T: ITMS + c NSI d Full ms2 762.32@cid35.00 [195.00-1535.00]

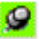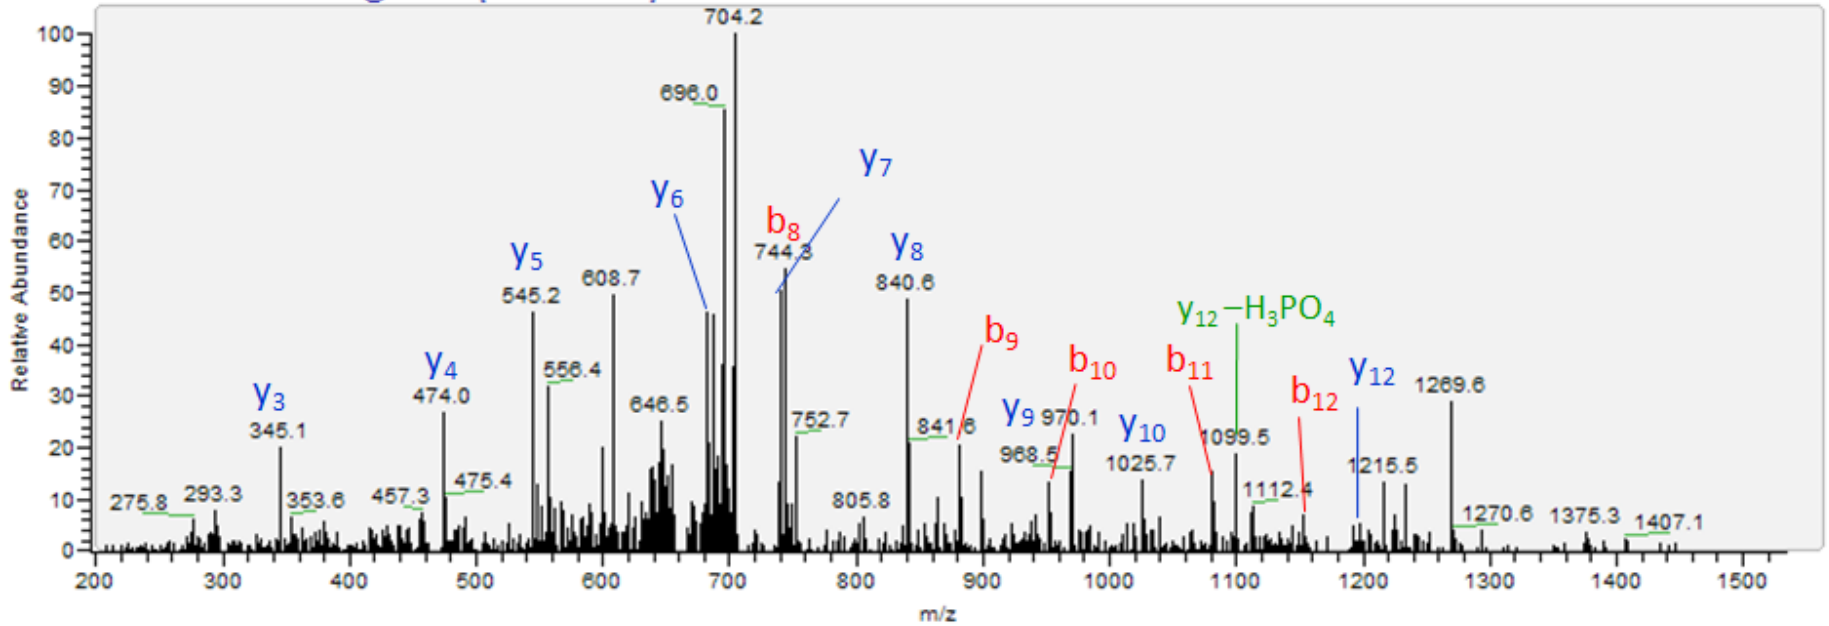

nagA

KPpDAALVDFLCDNADVITK

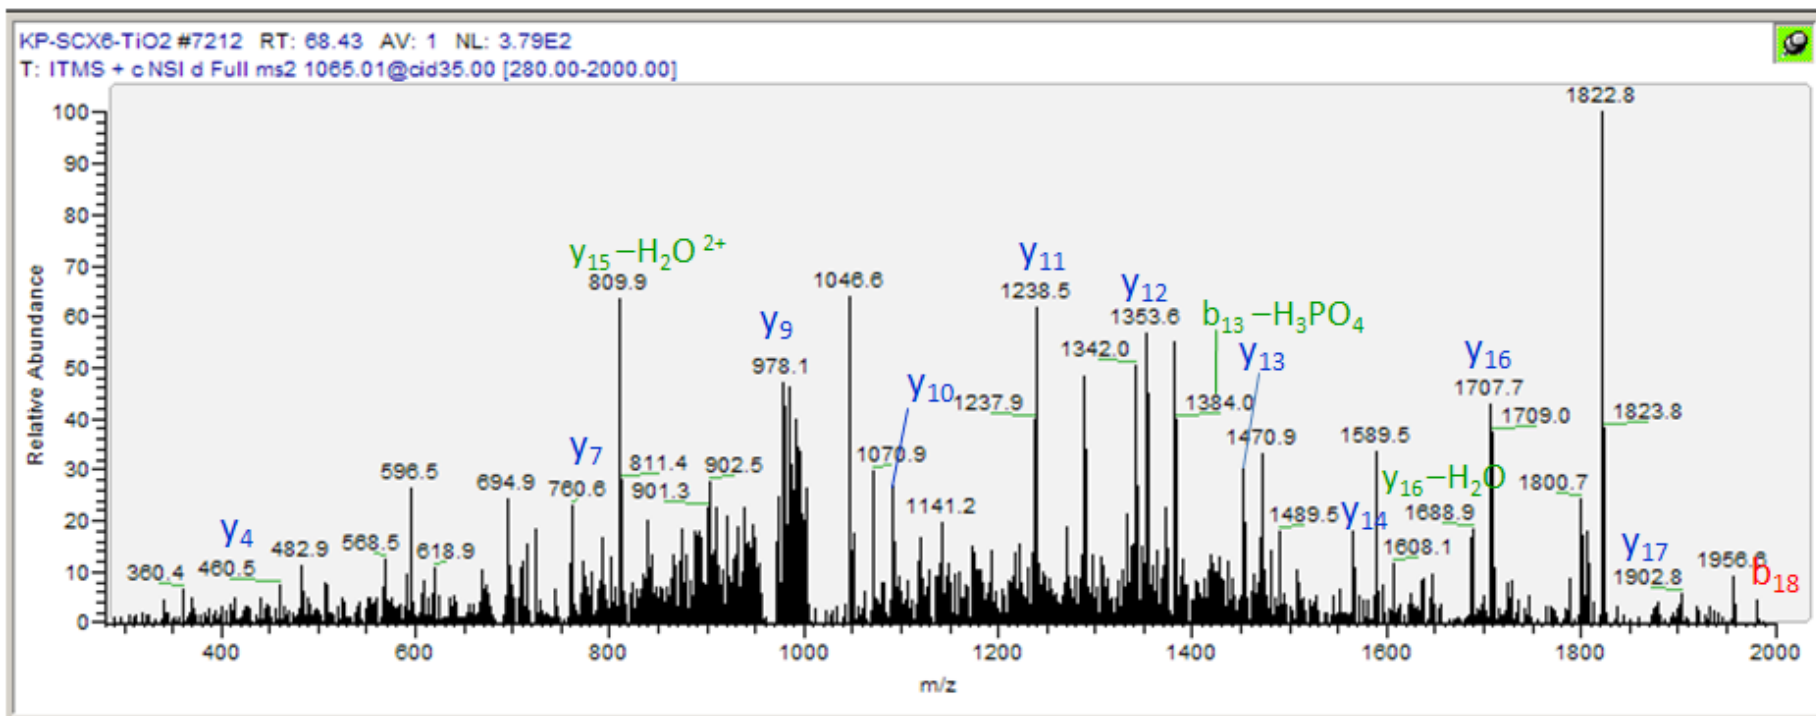

narG  
FpSEVCVGHLGK

KP-SCX15-TiO2 #4270 RT: 39.61 AV: 1 NL: 5.26E3  
T: ITMS + c NSI d Full ms2 628.28@cid35.00 [160.00-1270.00]

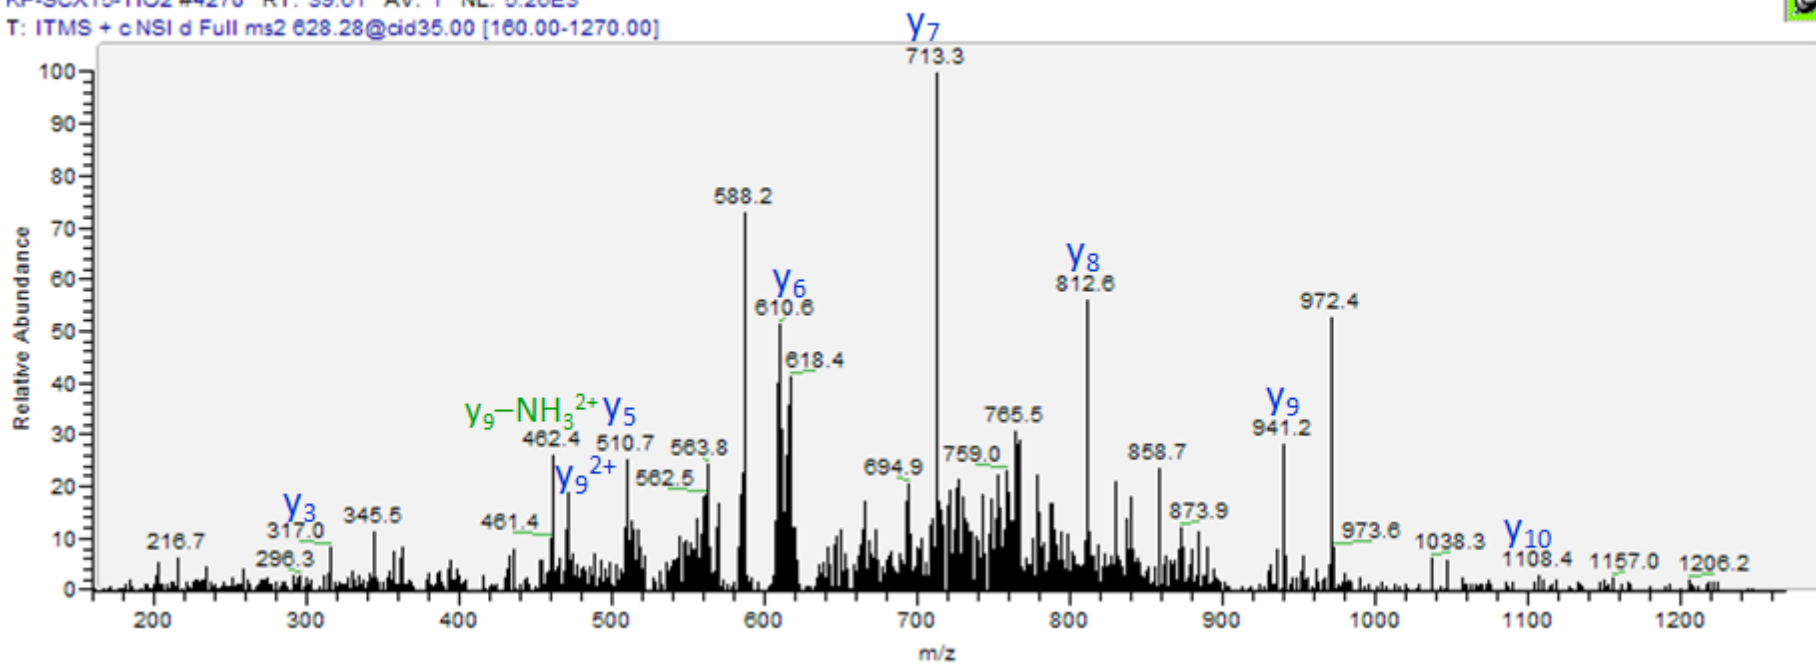

nuoF  
pTFCAHAPGAVEPLQSAIK

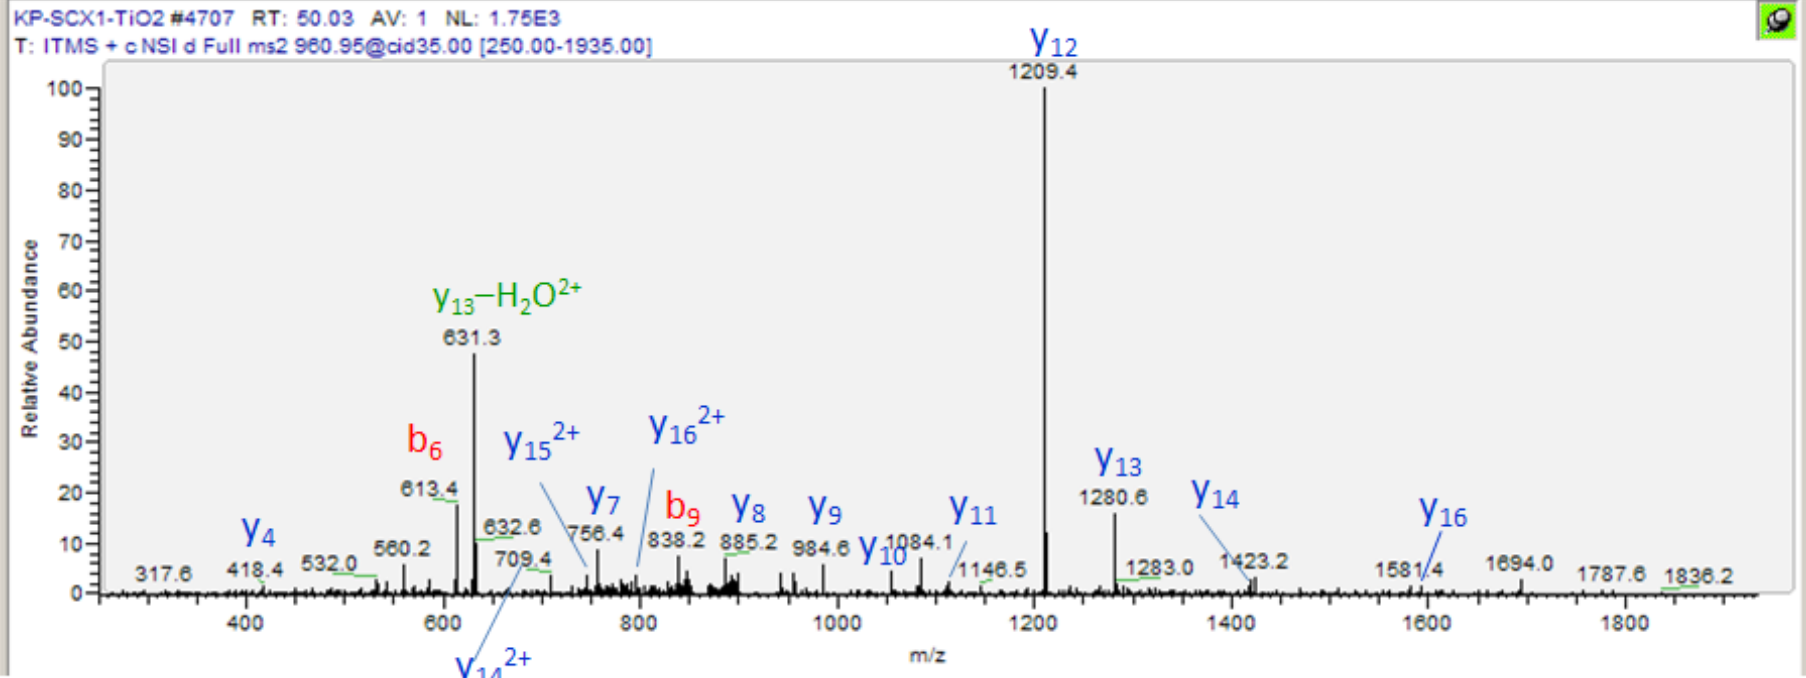

ompA

GMGEpSNPVTGNTCDNVK

KP-SCX10-TiO2 #2369 RT: 26.85 AV: 1 NL: 3.75E2  
T: ITMS + c NSI d Full ms2 910.36@cid35.00 [240.00-1835.00]

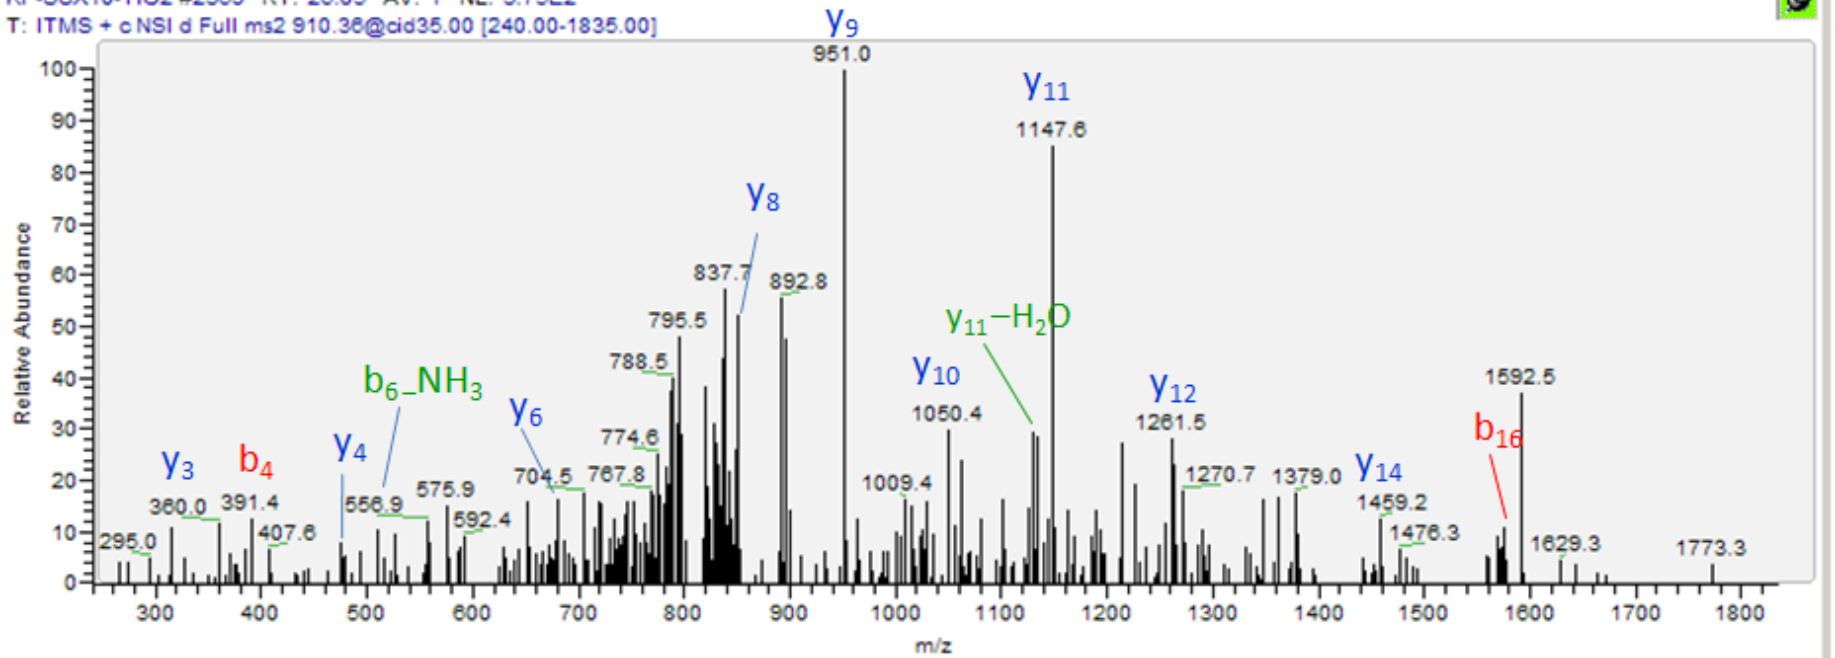



ompC  
NGpSVSGEGATNNGR

KP-TiO2 #2226 RT: 43.55 AV: 1 NL: 5.08E2

T: ITMS + c NSI d Full ms2 700.28@cid35.00 [180.00-1415.00]

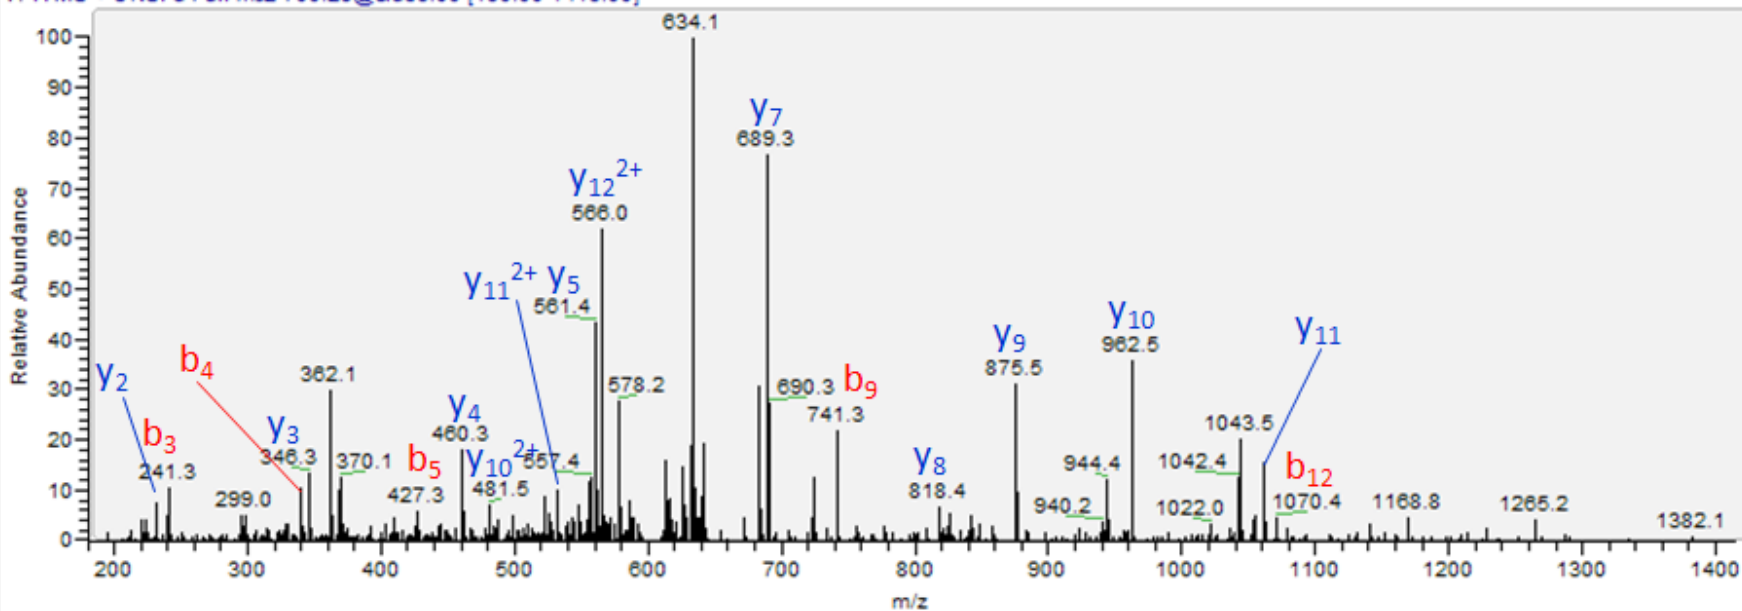

pckA  
GIAPSMHCSANVGEK

KP-TiO2 #2226 RT: 43.55 AV: 1 NL: 5.08E2

T: ITMS + c NSI d Full ms2 700.28@cid35.00 [180.00-1415.00]

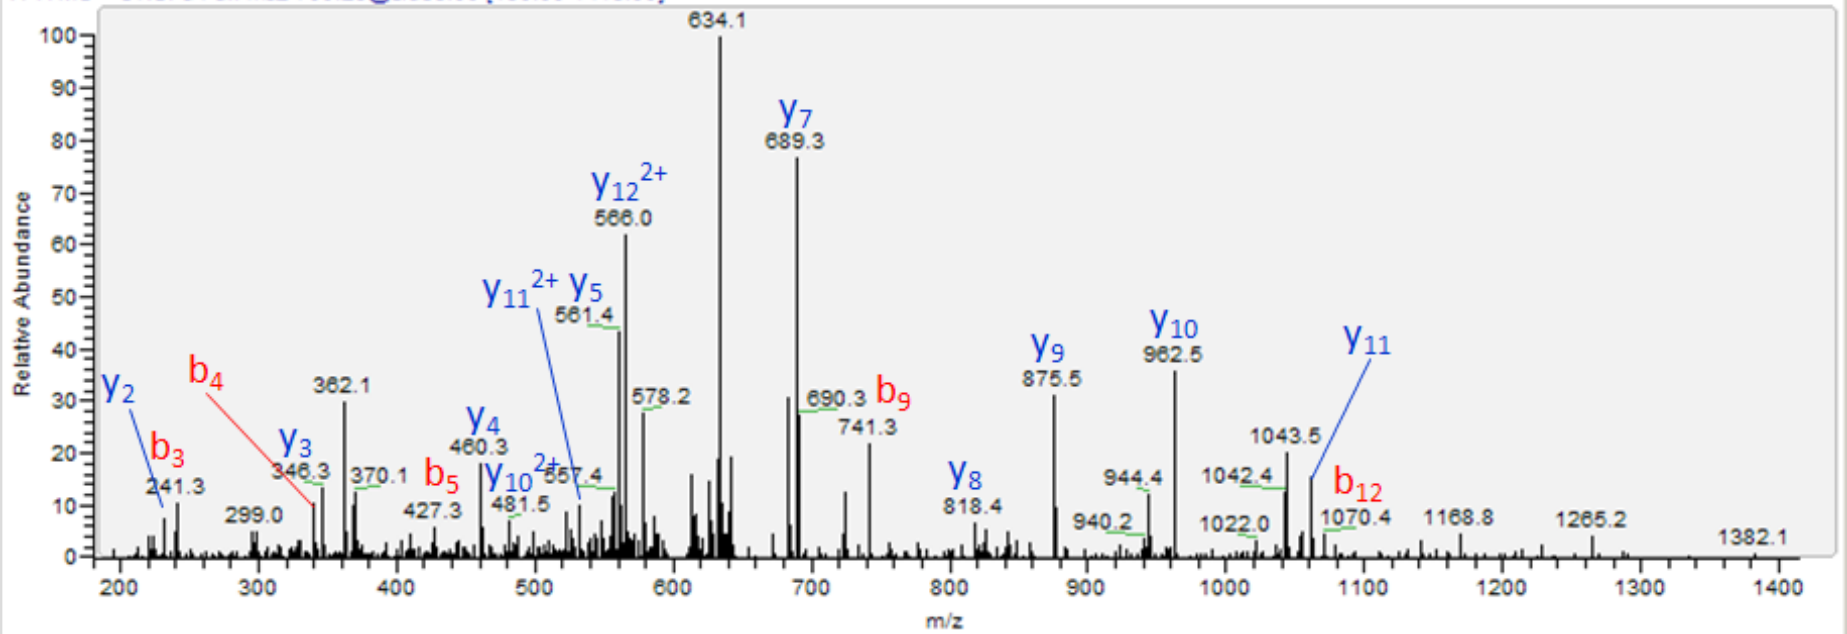

pepD  
pTPNIQIIHAGLEGLFK

KP-SCX1-TiO2 #6306 RT: 66.63 AV: 1 NL: 3.13E2

T: ITMS + e NSI d Full ms2 967.98@cid35.00 [255.00-1950.00]

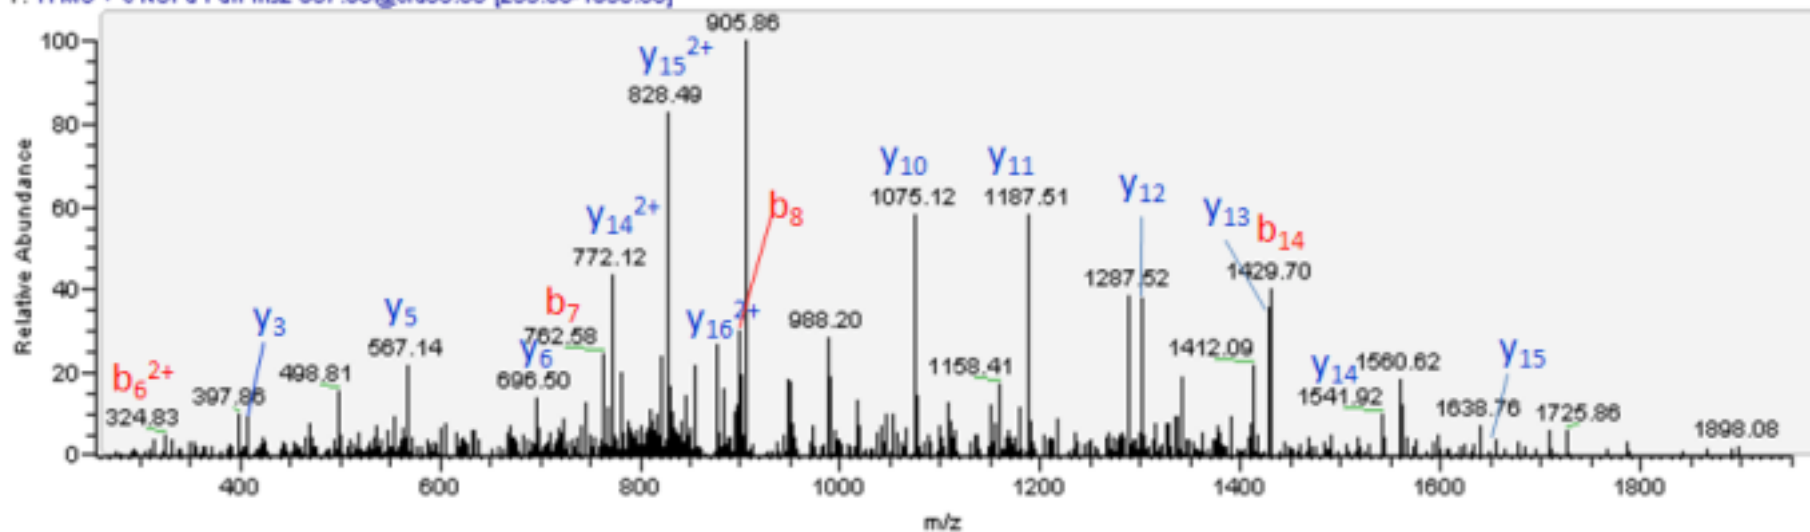

pepN

pHDGSAATCDDFVQAMEDASNVDLSHFR

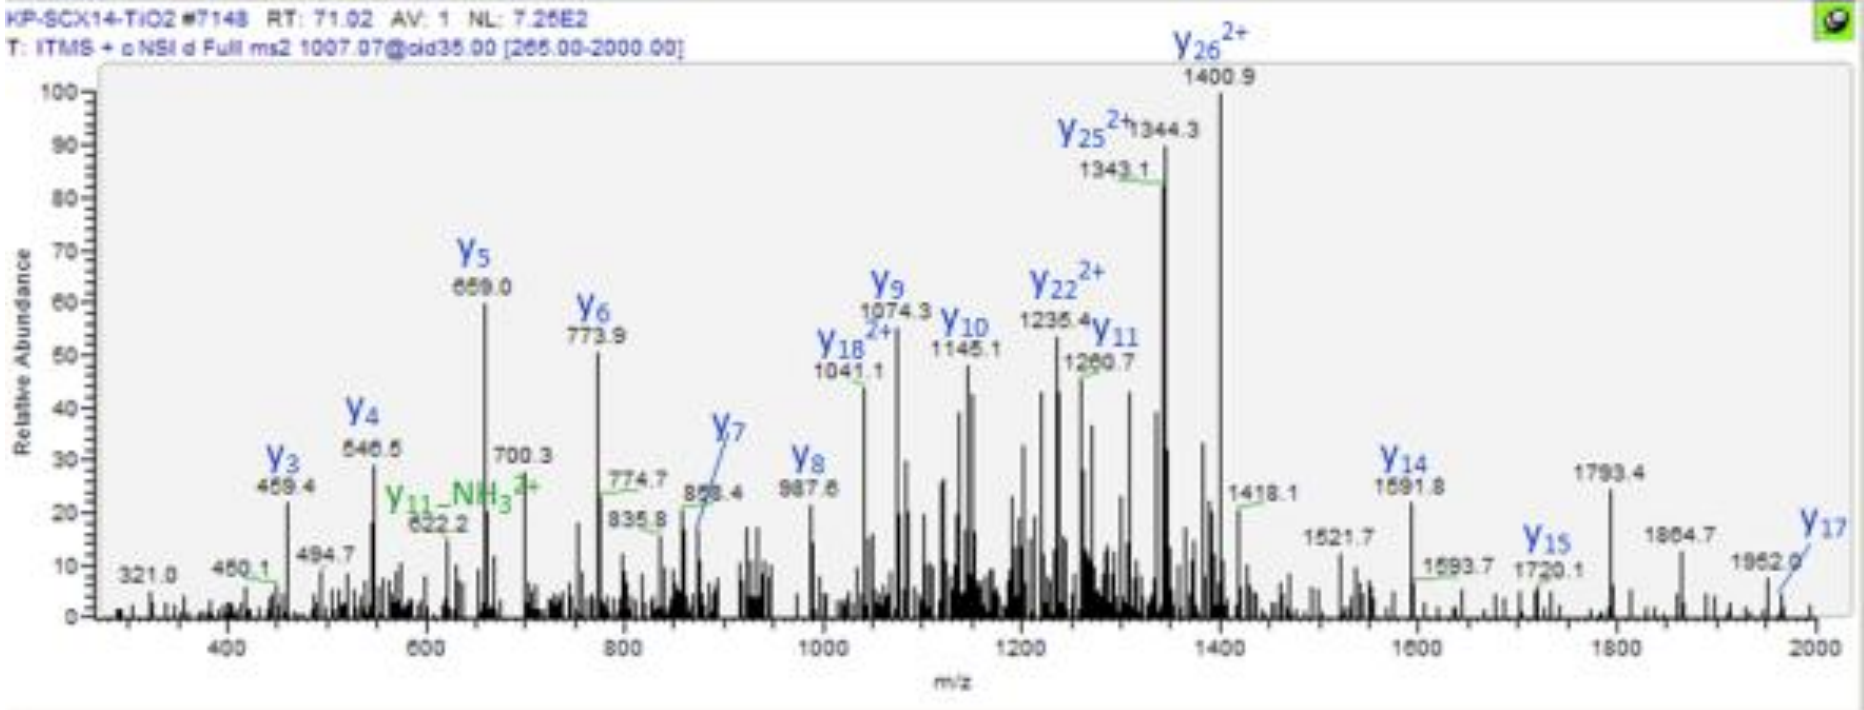

pepN

HDGSAATCDDFVQAMEDApSNVDLSHFR

KP-SCX13-TiO2 #7354 RT: 70.02 AV: 1 NL: 4.29E3  
T: ITMS + e NSI d Full ms2 1007.07@d35.00 [265.00-2000.00]

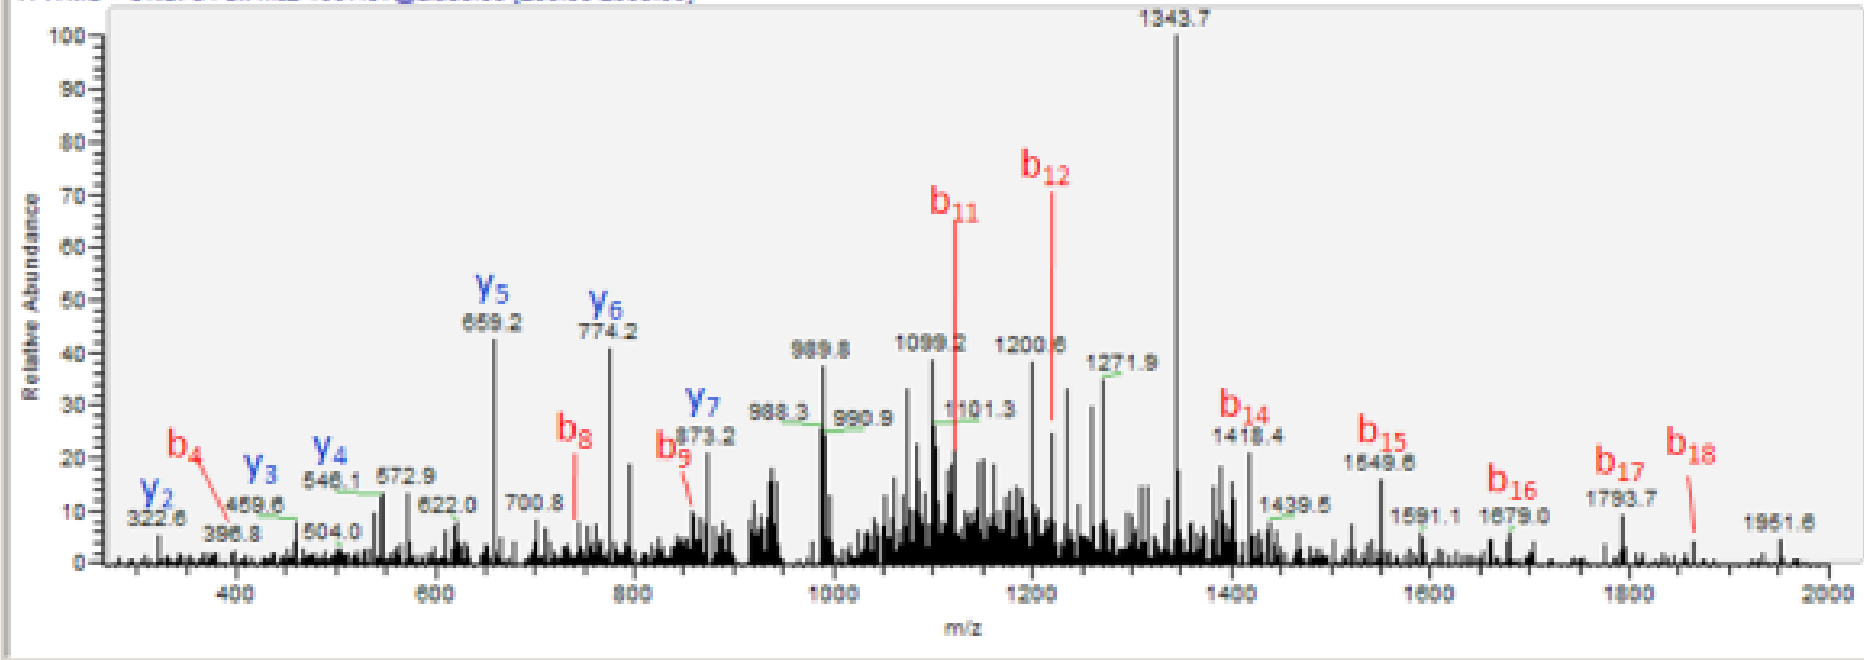

pgk

pYAALCDVFVMDAFGTAHR

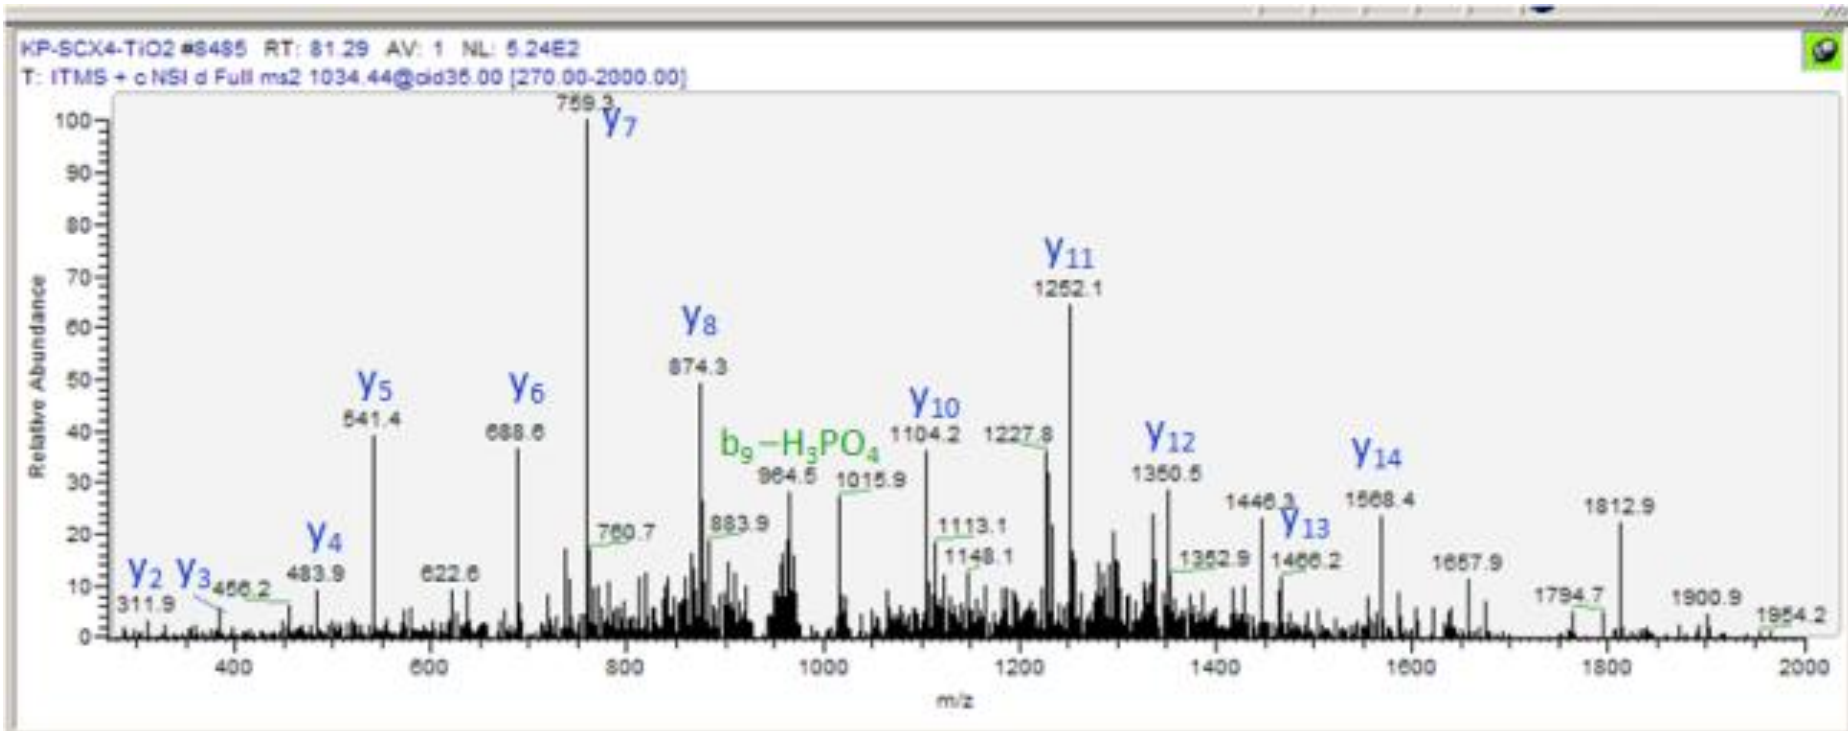

pgk

FApDVACAGPLLAELDALGK

KP-SCK11-TiO2 #8640 RT: 81.91 AV: 1 NL: 1.05E3  
T: ITMS + e NSI d Full ms2 1013.49@cid35.00 [265.00-2000.00]

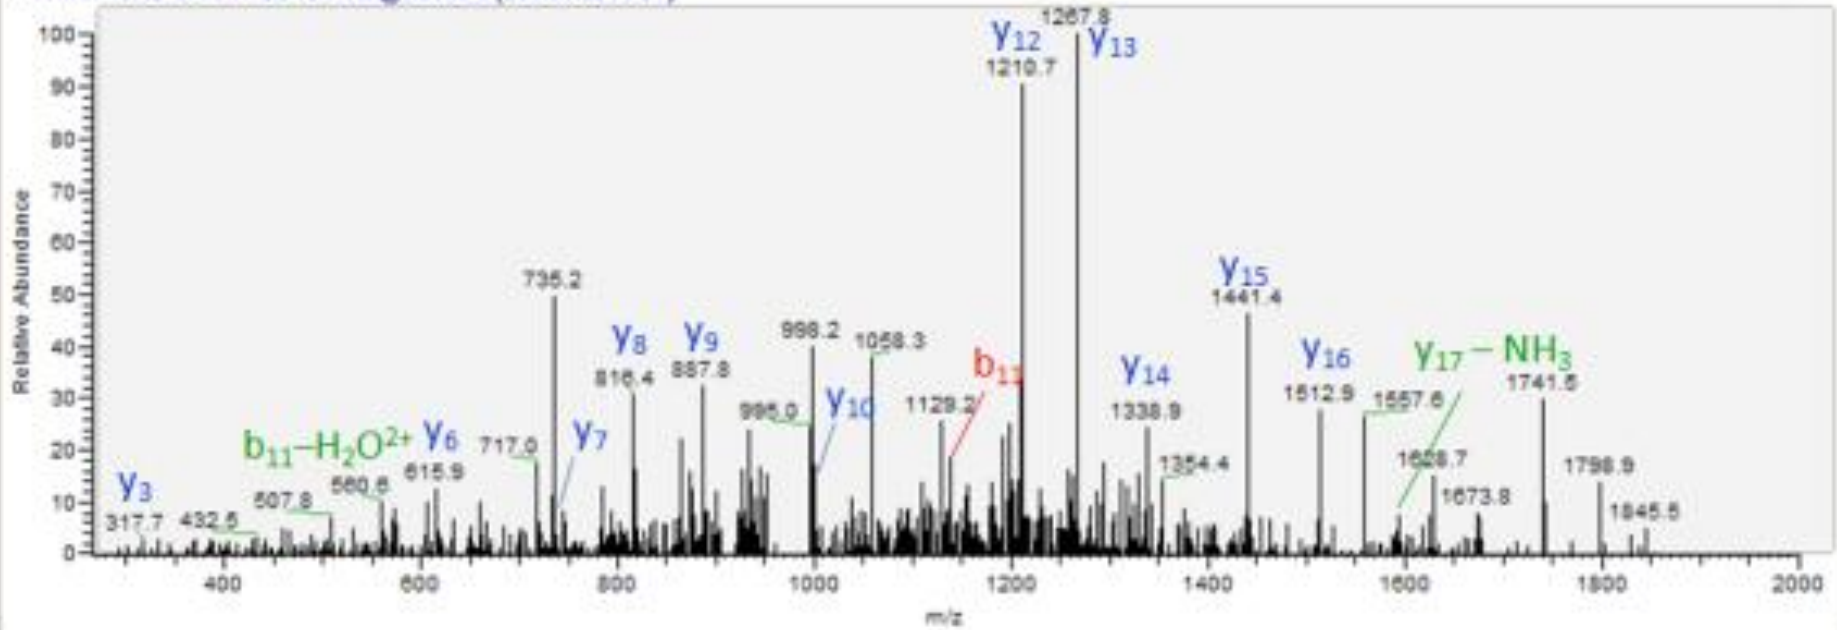

pgm

KGGLADGIVITPpSHNPPEDGGIK

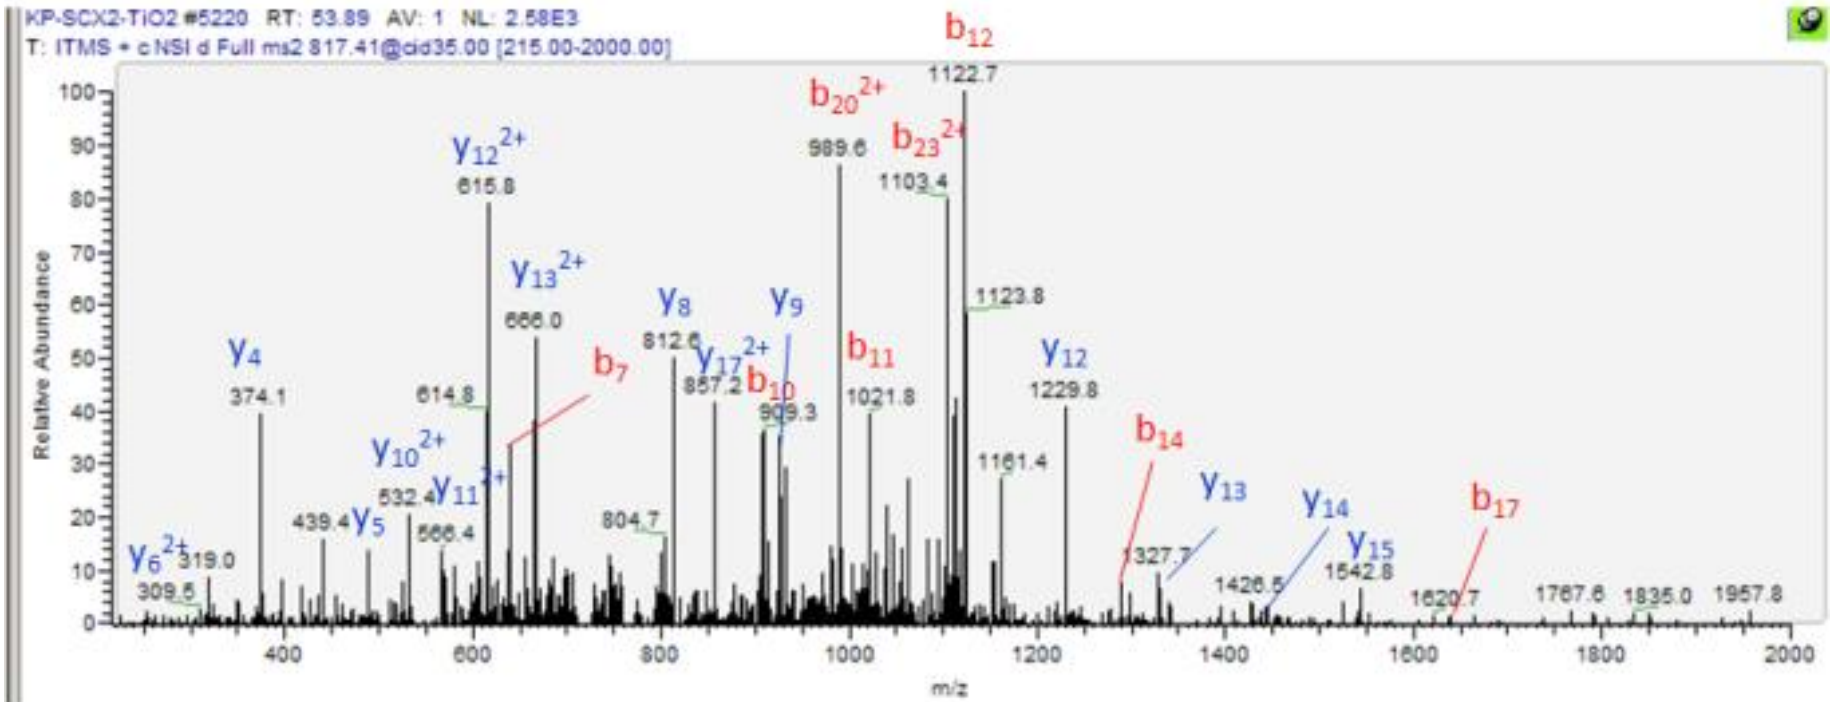



pgm

KGGLADGIVIpTPSHNPPEDGGIK

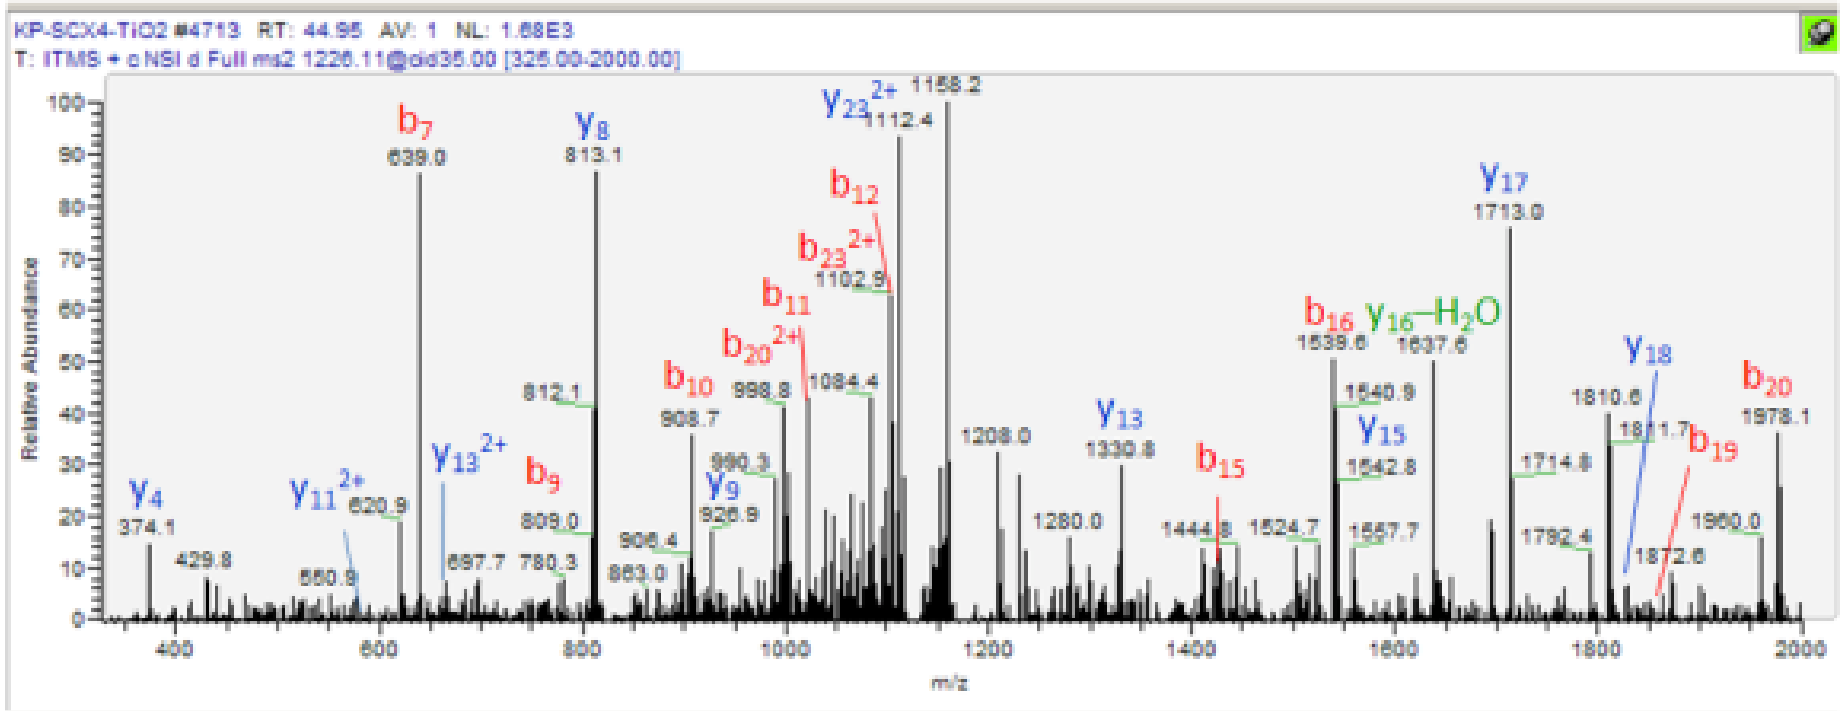

phoC

IRPFAFYGVSTCNTTEQpDK

KP-SCX7-TIO2 #0170 RT: 56.91 AV: 1 NL: 3.59E3

T: ITMS + c NSI d Full ms2 1129.50 @ dd35.00 [300.00-2000.00]

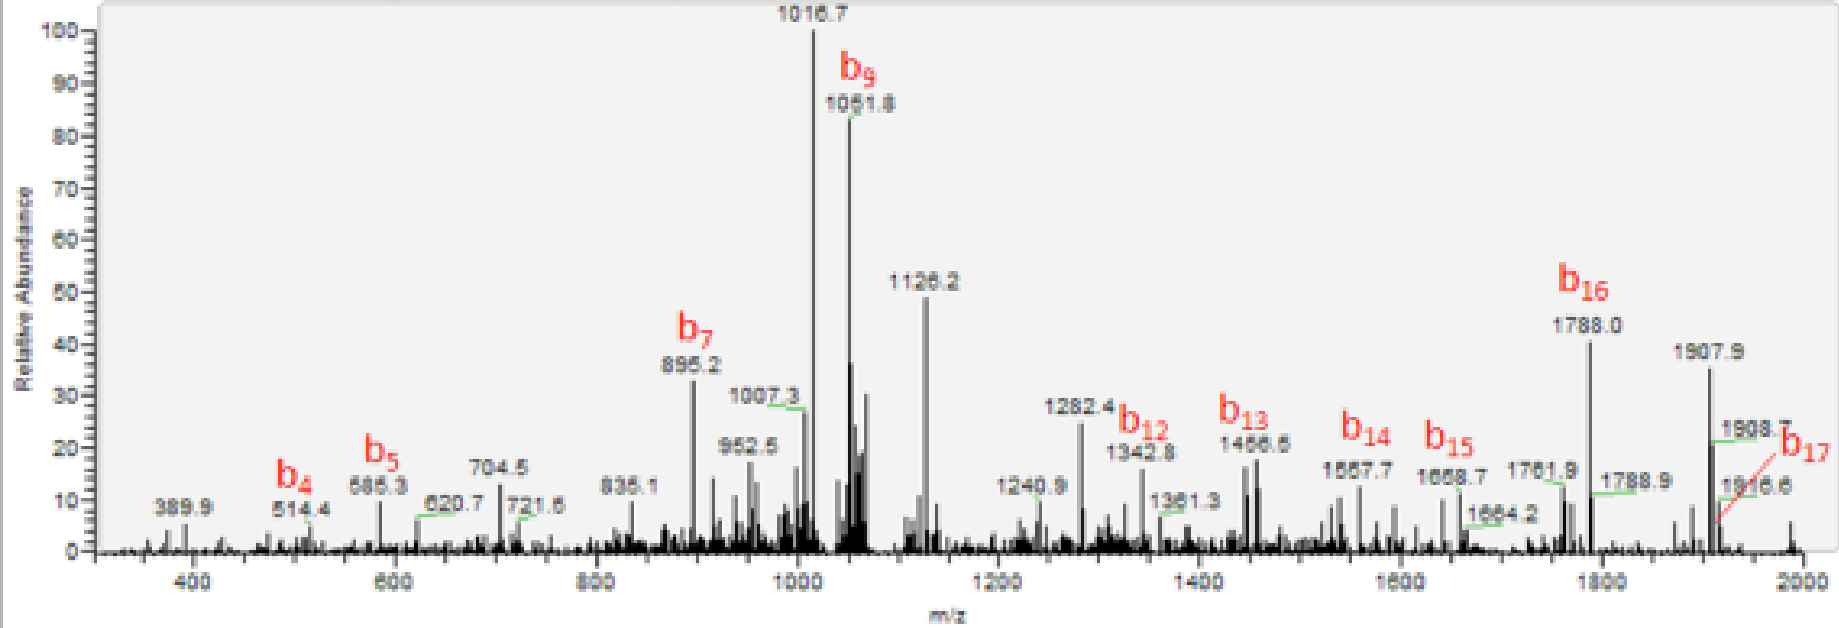

ppsA  
pTCHAAIAR

KP-SGX8-T102 #2804 RT: 29.17 AV: 1 NL: 1.28E4  
T: ITMS + eNSI.d Full ms2 518.24@dd35.00 [130.00-1050.00]

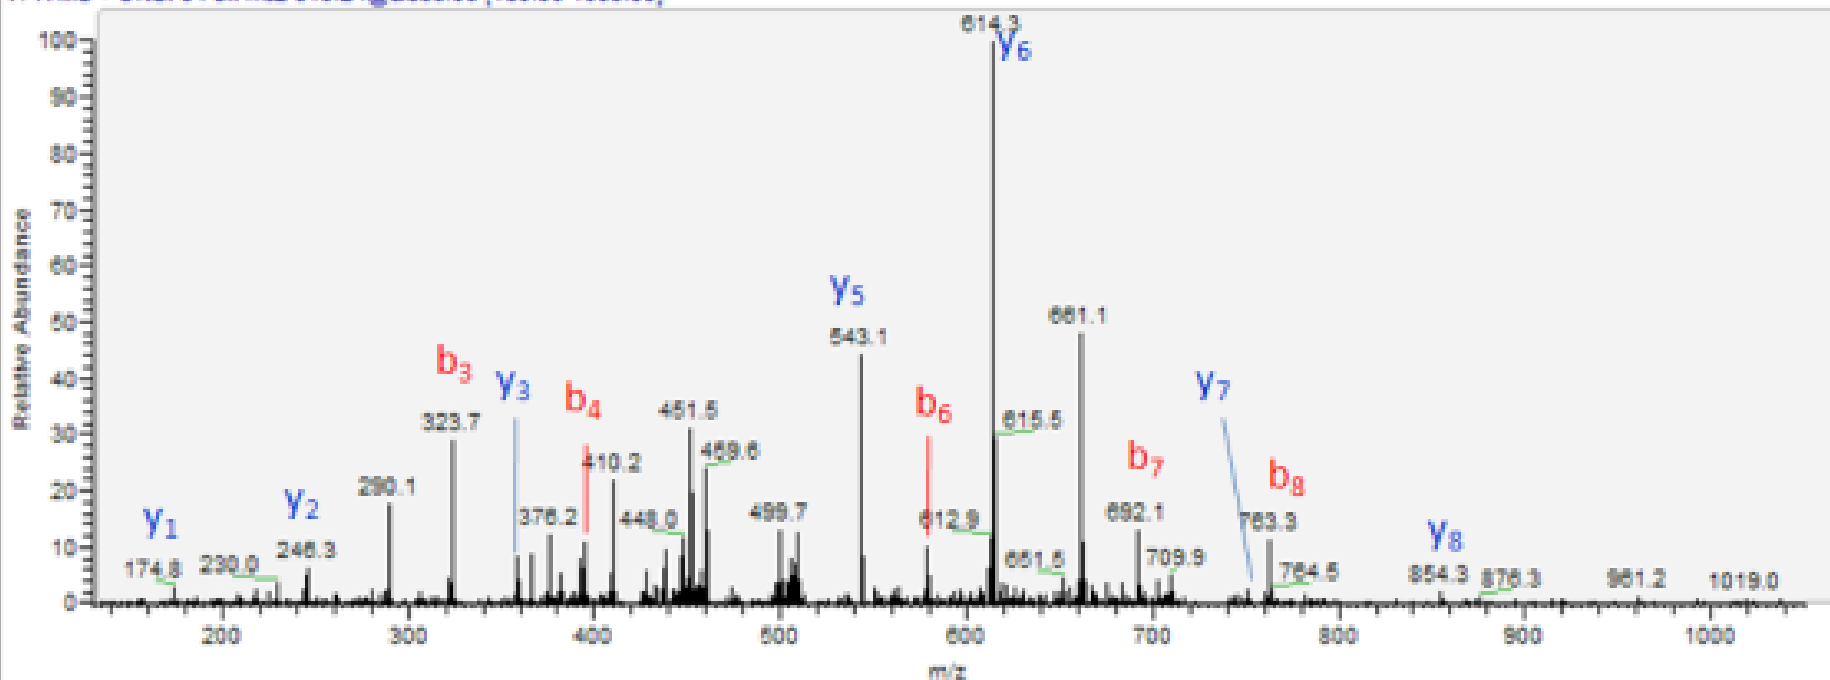

ppsA  
GGR<sup>p</sup>TCHAAIIAR

KP-SCX12-TIO2 #0372 RT: 24.46 AV: 1 NL: 1.78E4

T: ITMS + e NSI d Full ms2 435.88@sid35.00 [110.00-1320.00]

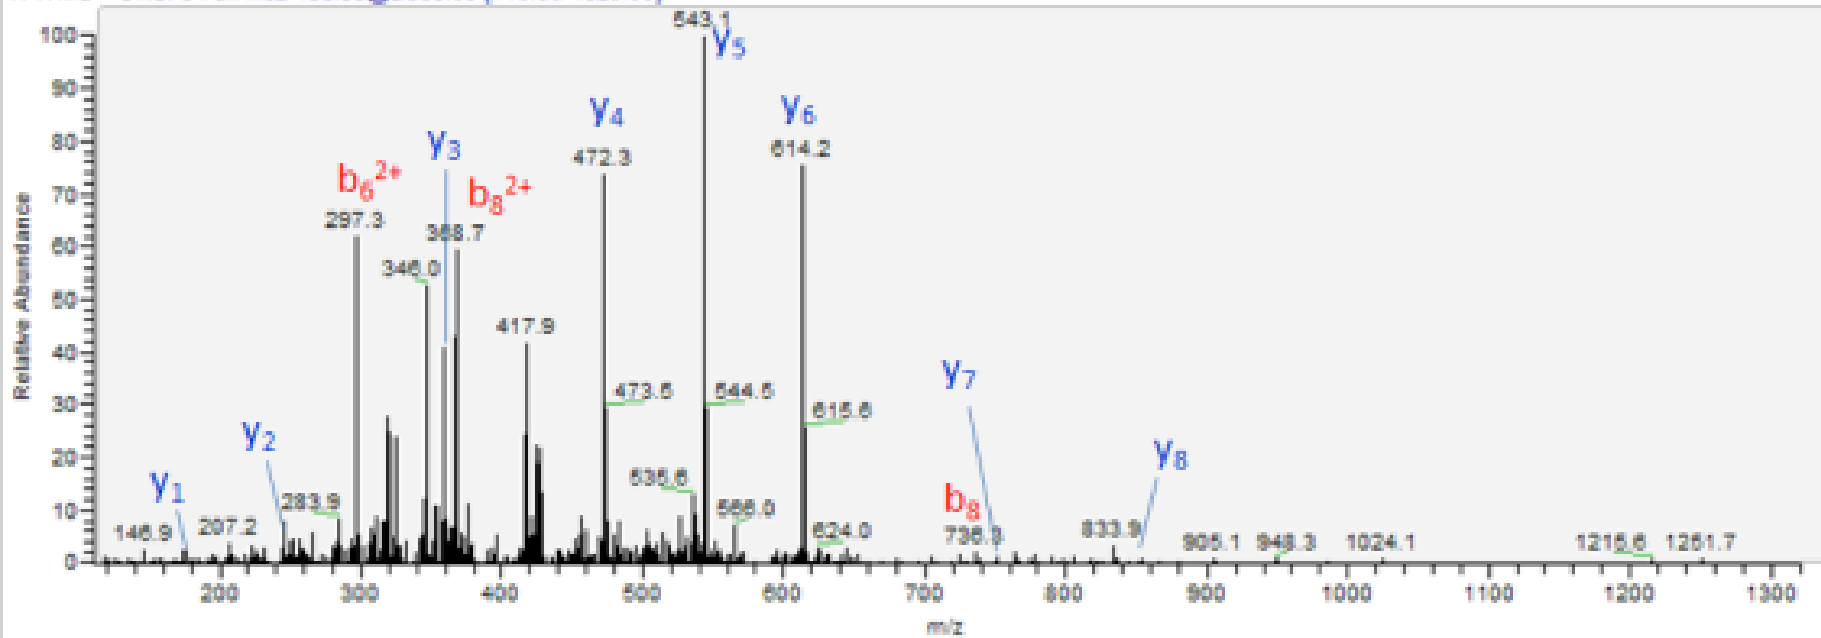

prsA  
LpY**T**SLGDAAVGR

KP-TiO2 #4265 RT: 62.78 AV: 1 NL: 1.42E3

T: ITMS - c NSI d Full ms2 651.81@d35.00 [165.00-1315.00]

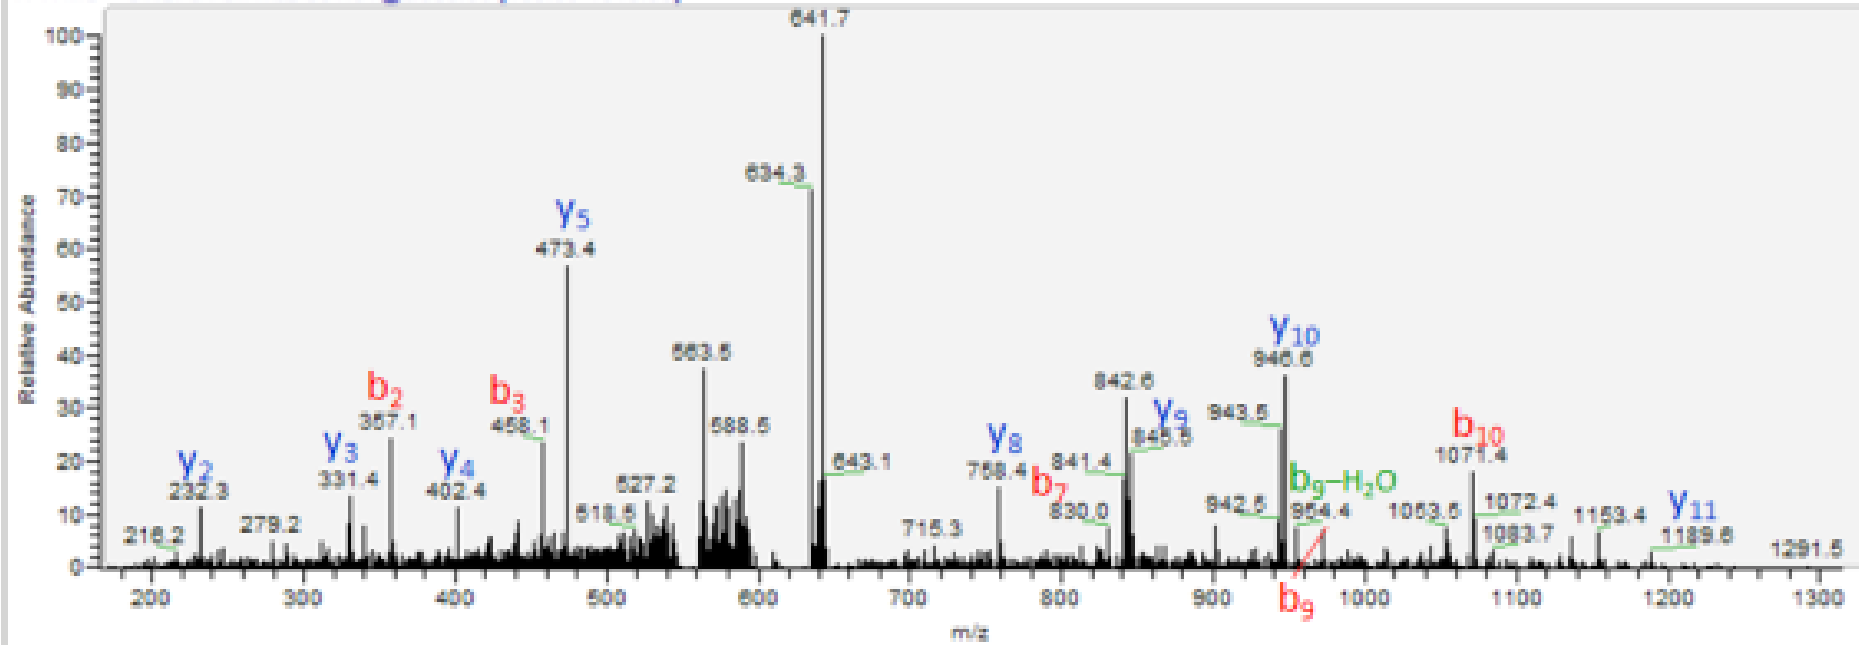

purL

pDNPACADQEHQAK

KP-SCX13-TIQ2 #1403 RT: 17.81 AV: 1 NL: 6.79E3

T: ITMS + c NSI d Full ms2 753.78@cis35.00 [195.00-1520.00]

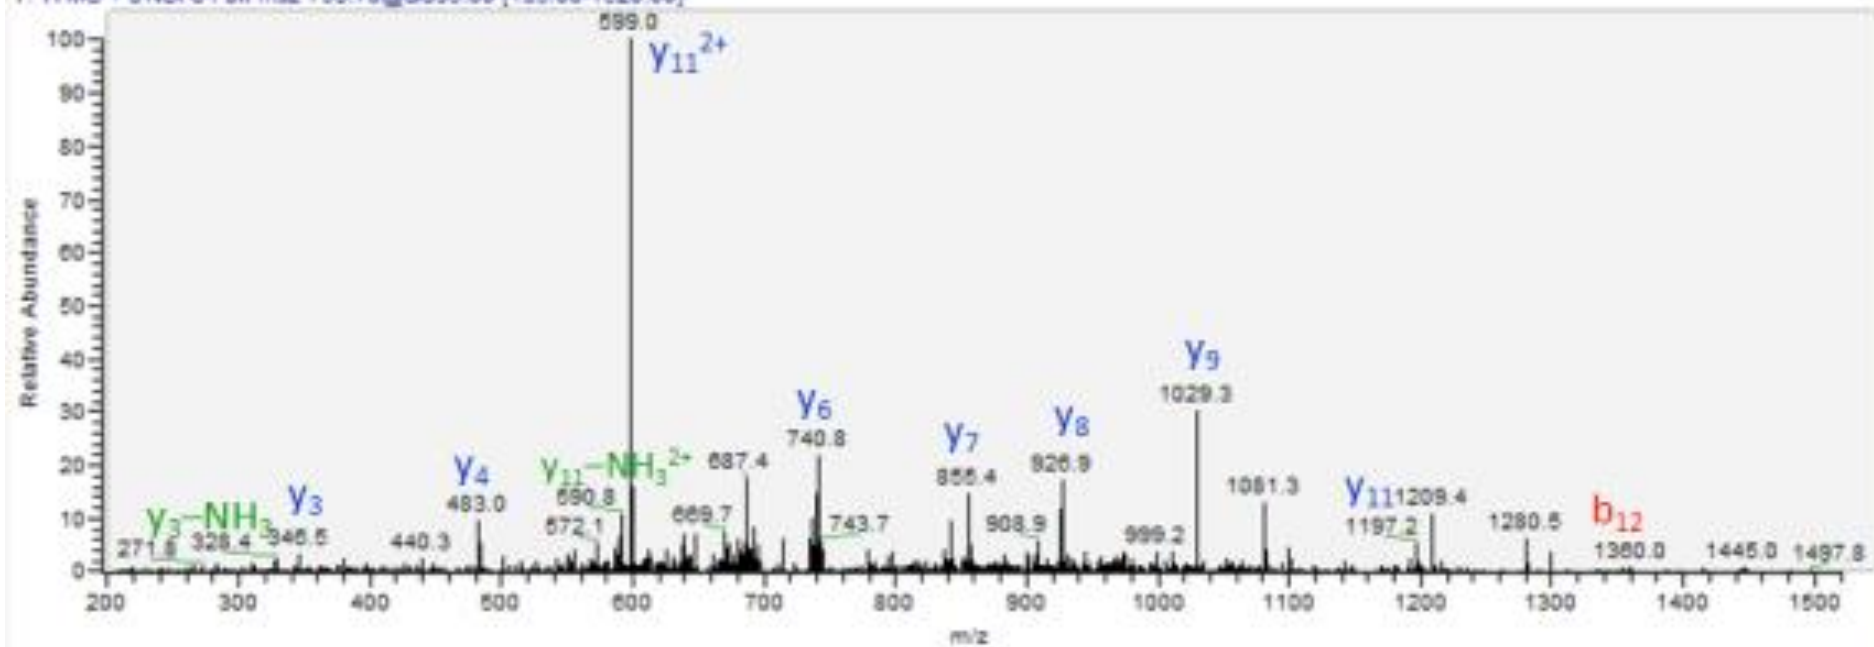

pyrE

pDYGCQVISIITLK

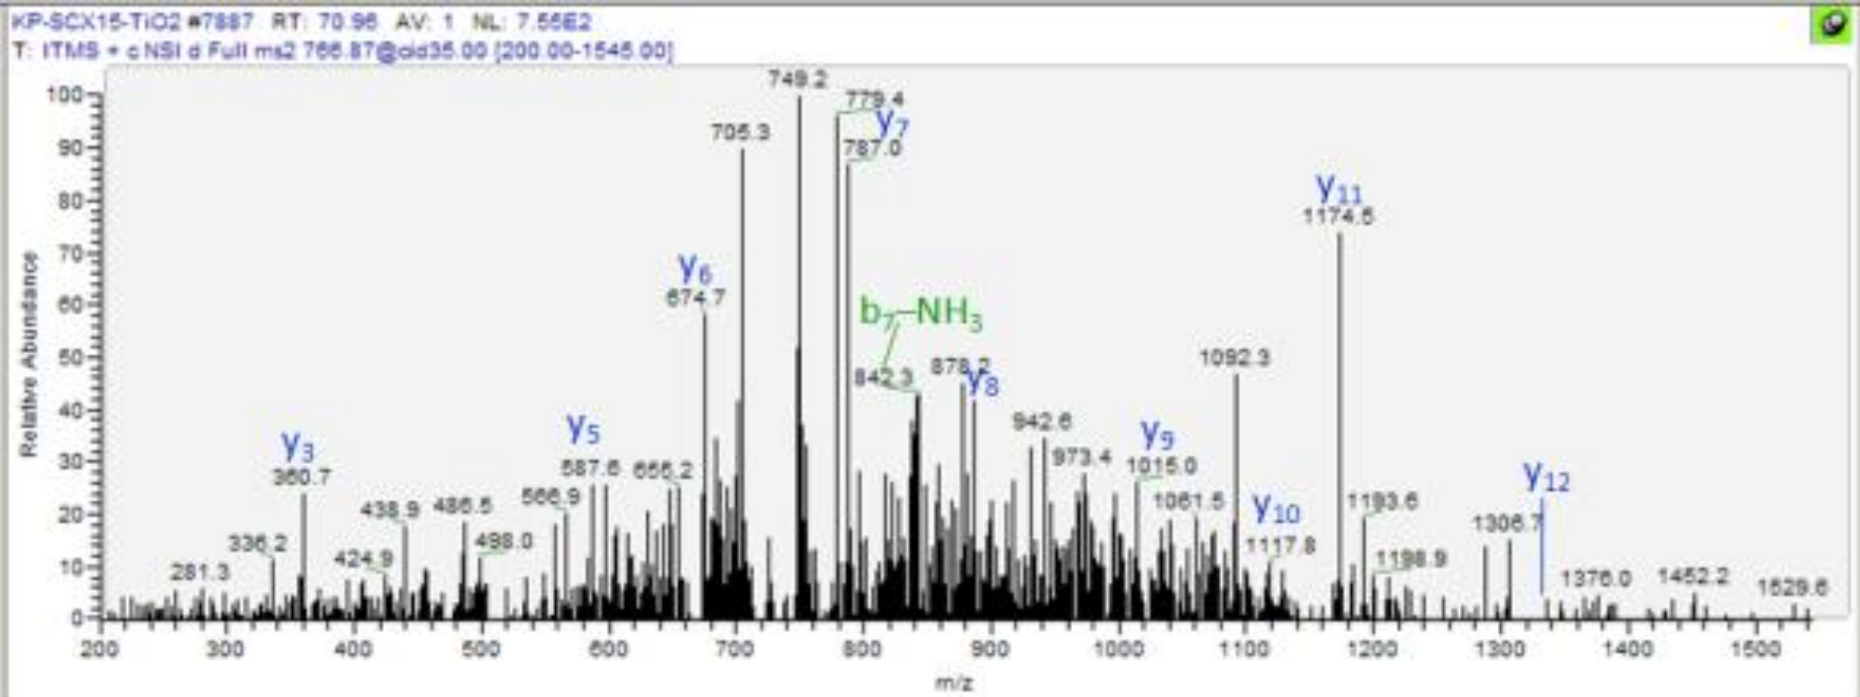

rncS

GEAHDQEFp[**TIH**]CQVSGLSEPVVGTGSSR

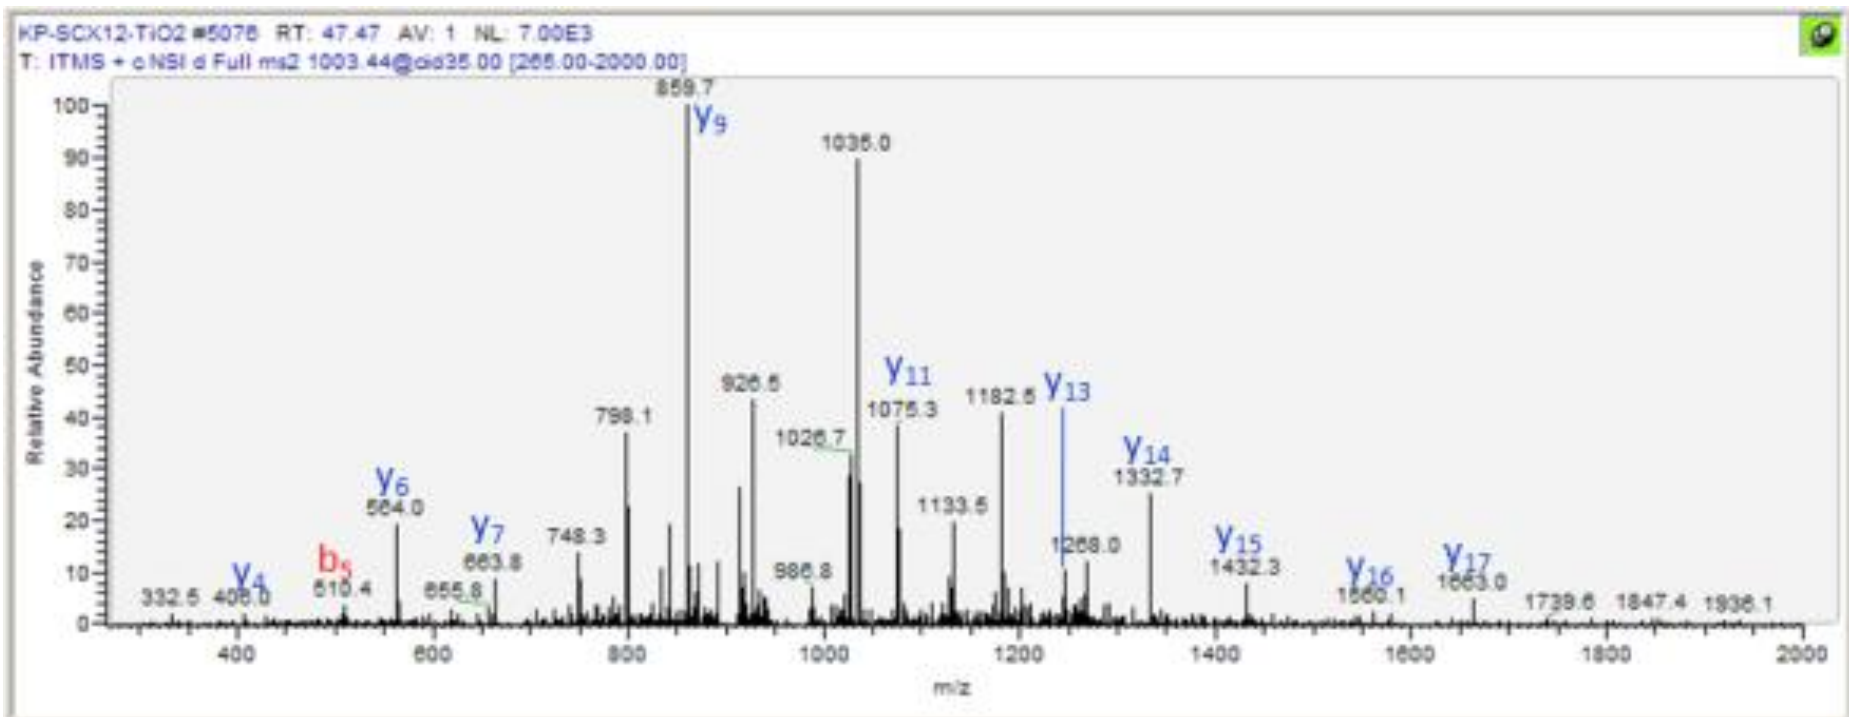



rplB  
DGAYVpTLR

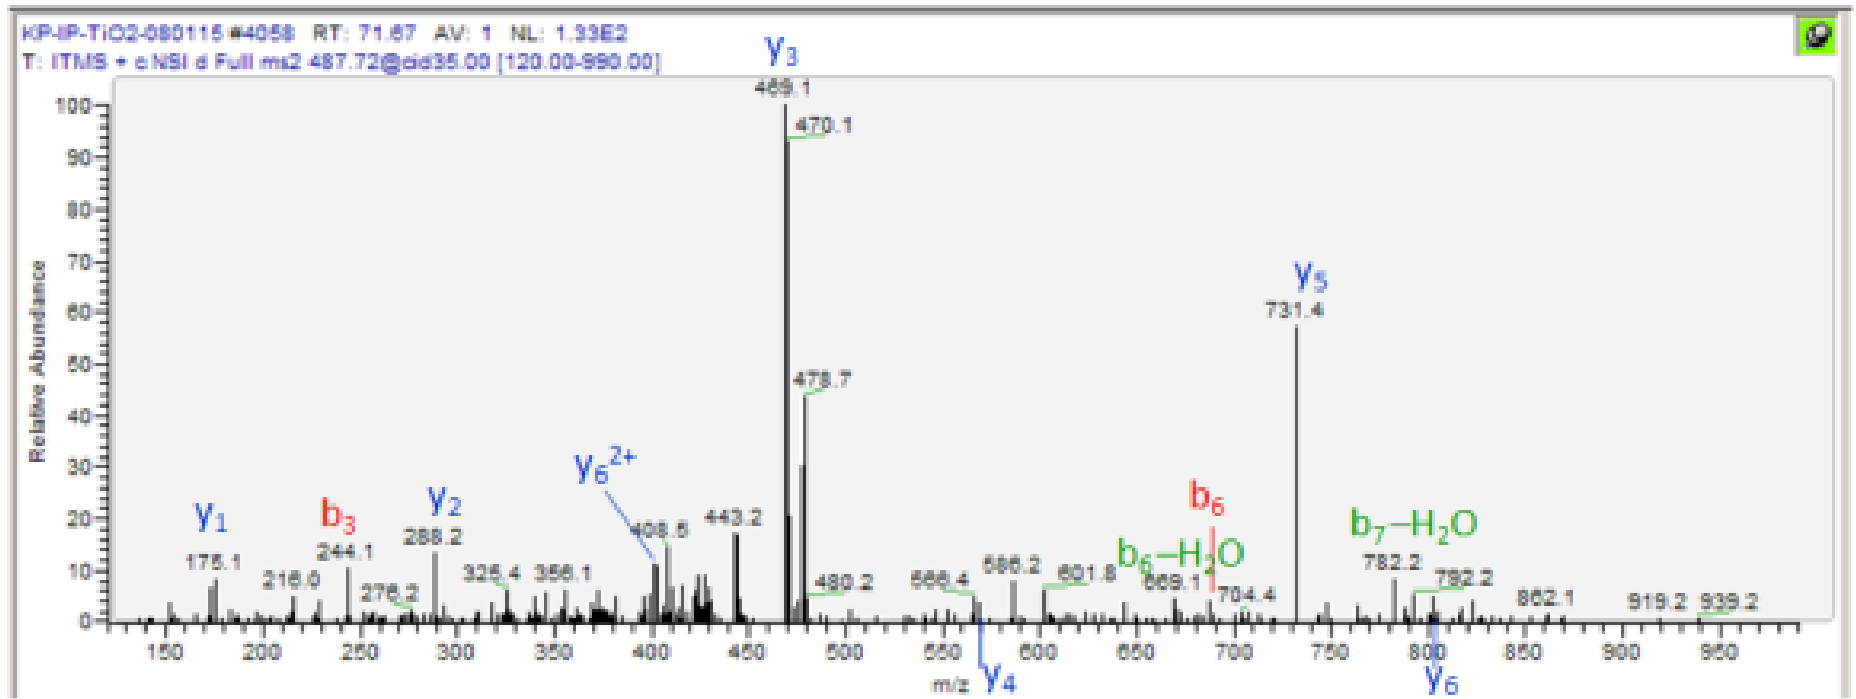

rplJ

AAAFEGELIPApSQIDR

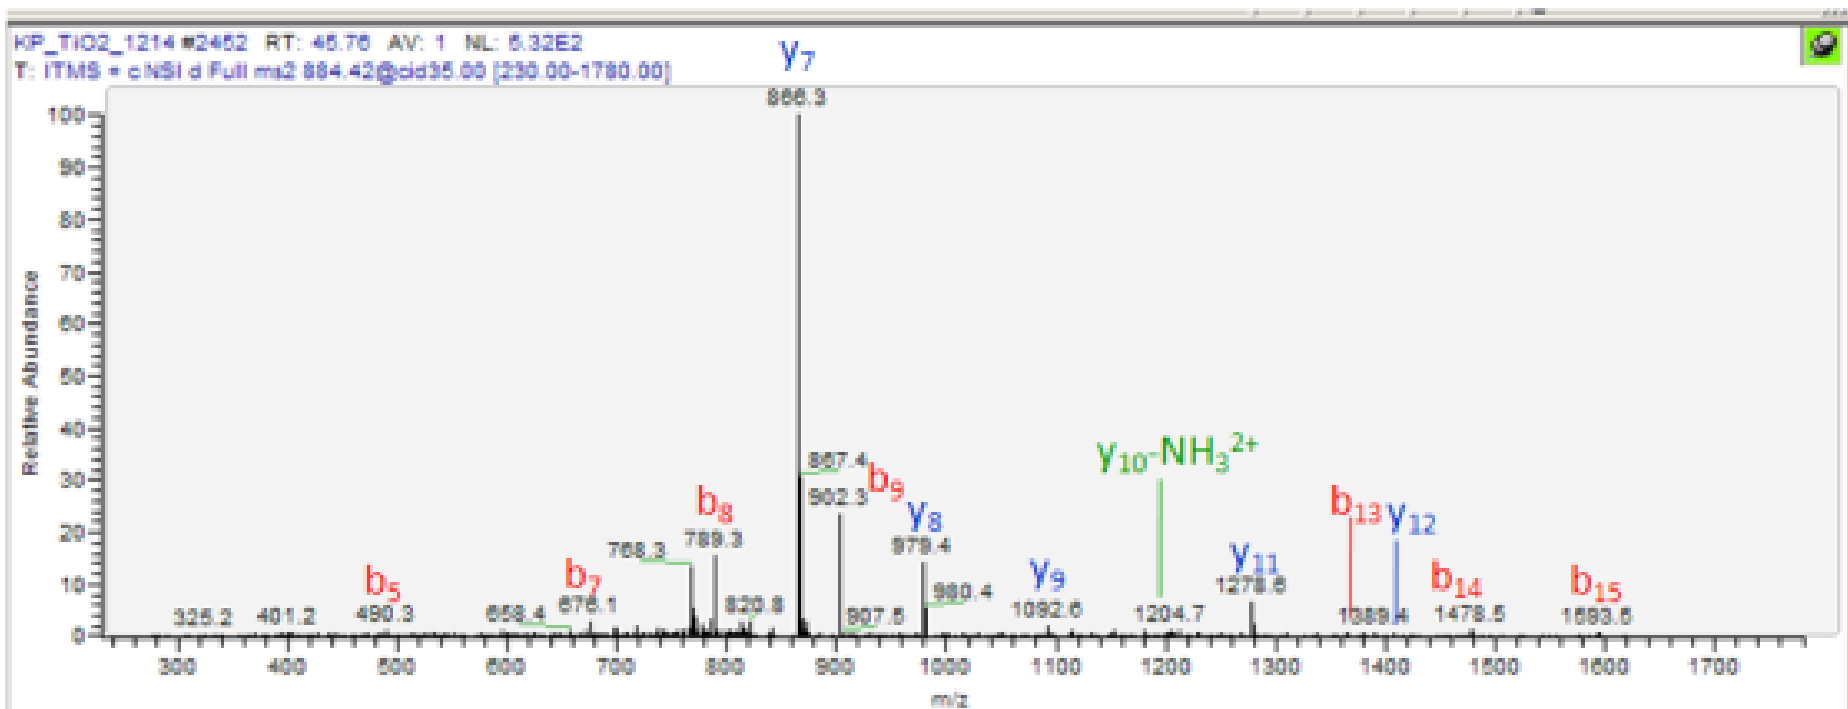

rpLN  
FpDGNACVILNNNSEQPIGTR

KP-SGX5-TIO2 #5329 RT: 49.87 AV: 1 NL: 4.17E2  
T: ITMS + c NSI d Full ms2 1121.99@cid35.00 [295.00-2000.00]

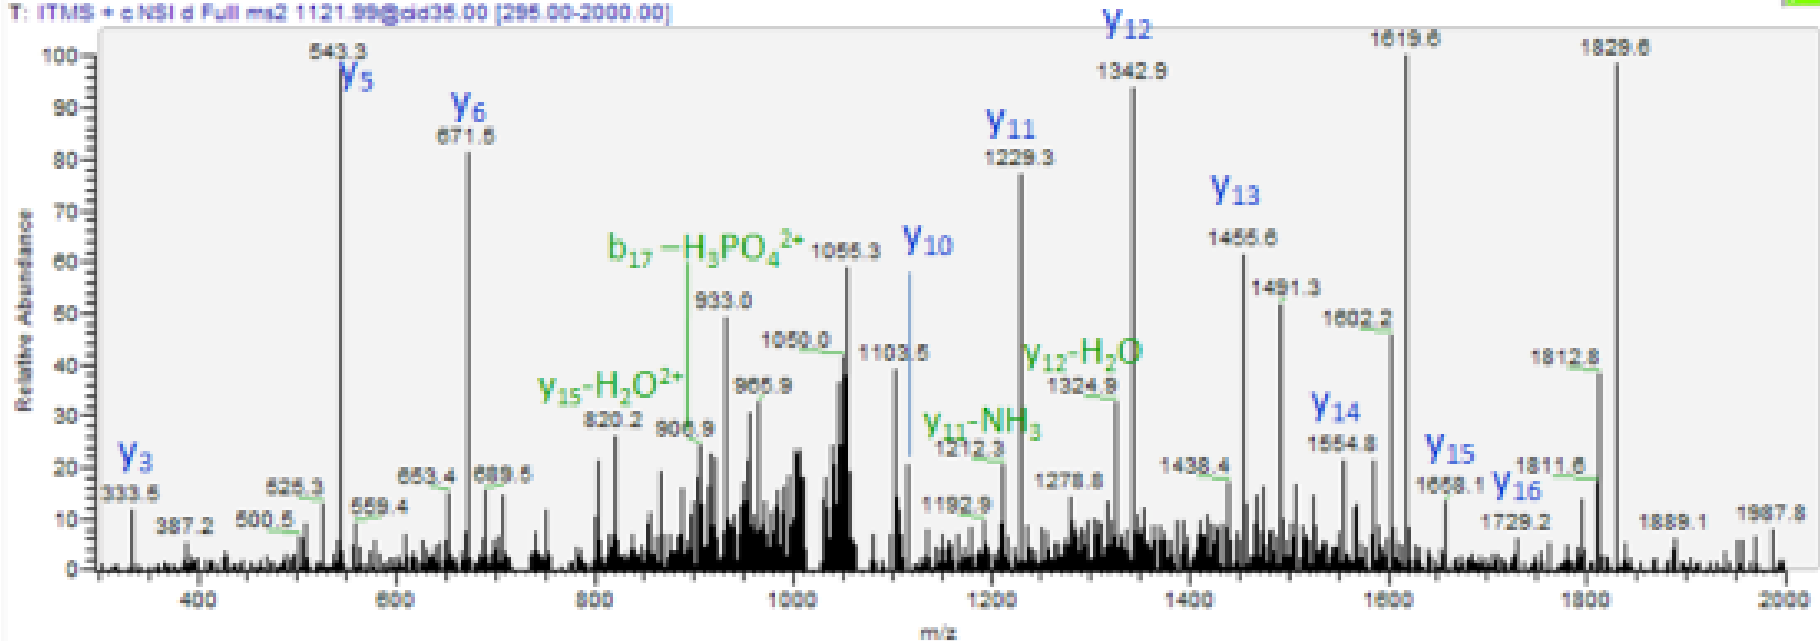

rplU  
MpYAVFQSGGK

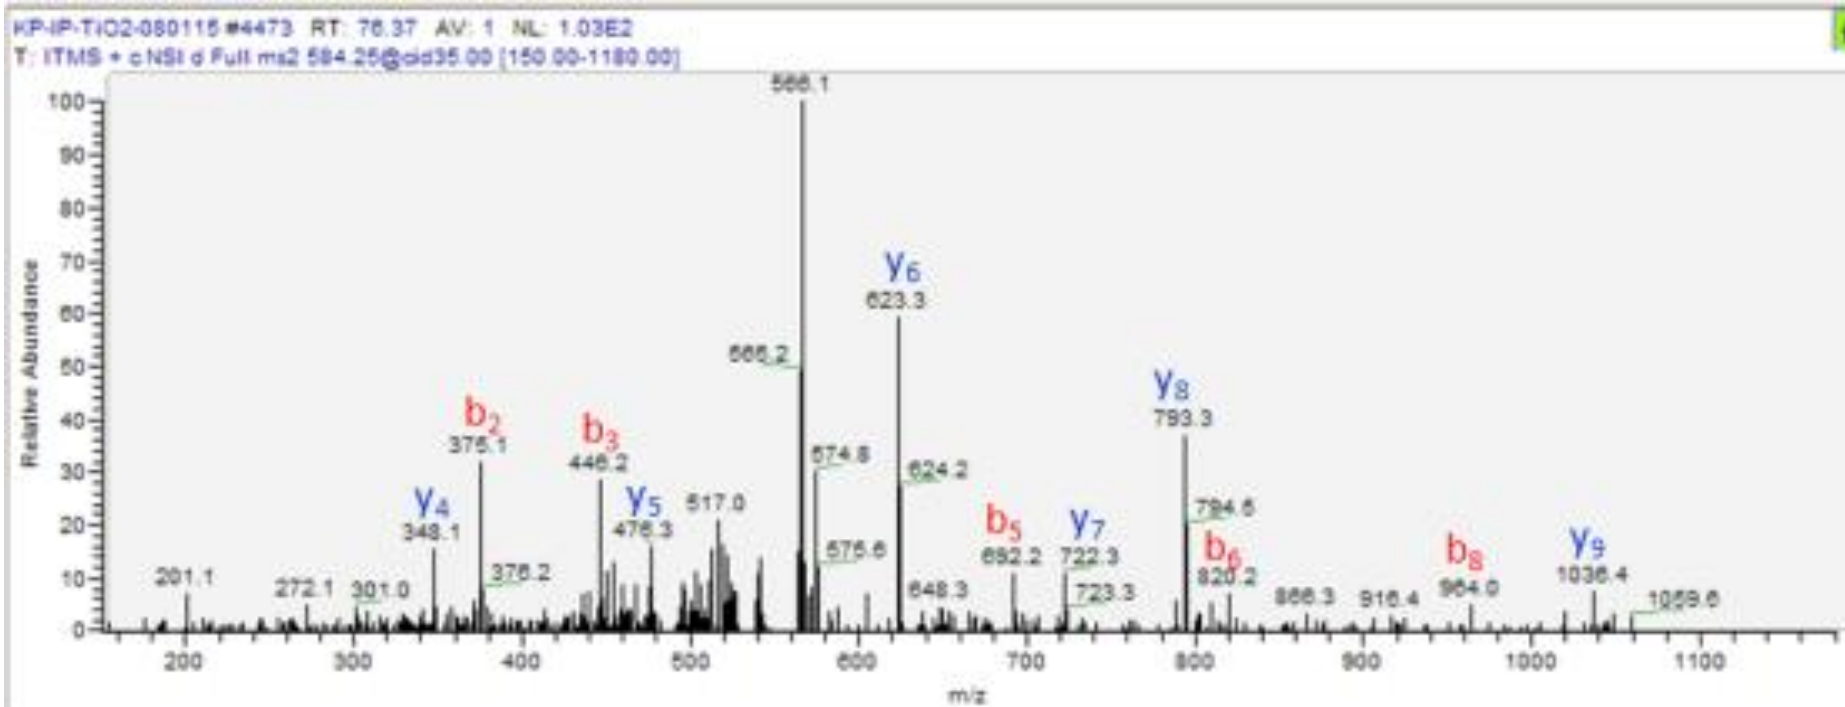

rpmE

GIpHPNYDEITATCSCGNVMK

KP\_TiO2\_1214 #2092 RT: 40.77 AV: 1 NL: 1.19E2  
T: ITMS + c NSI d Full ms2 1153.97@cid35.00 [305.00-2000.00]

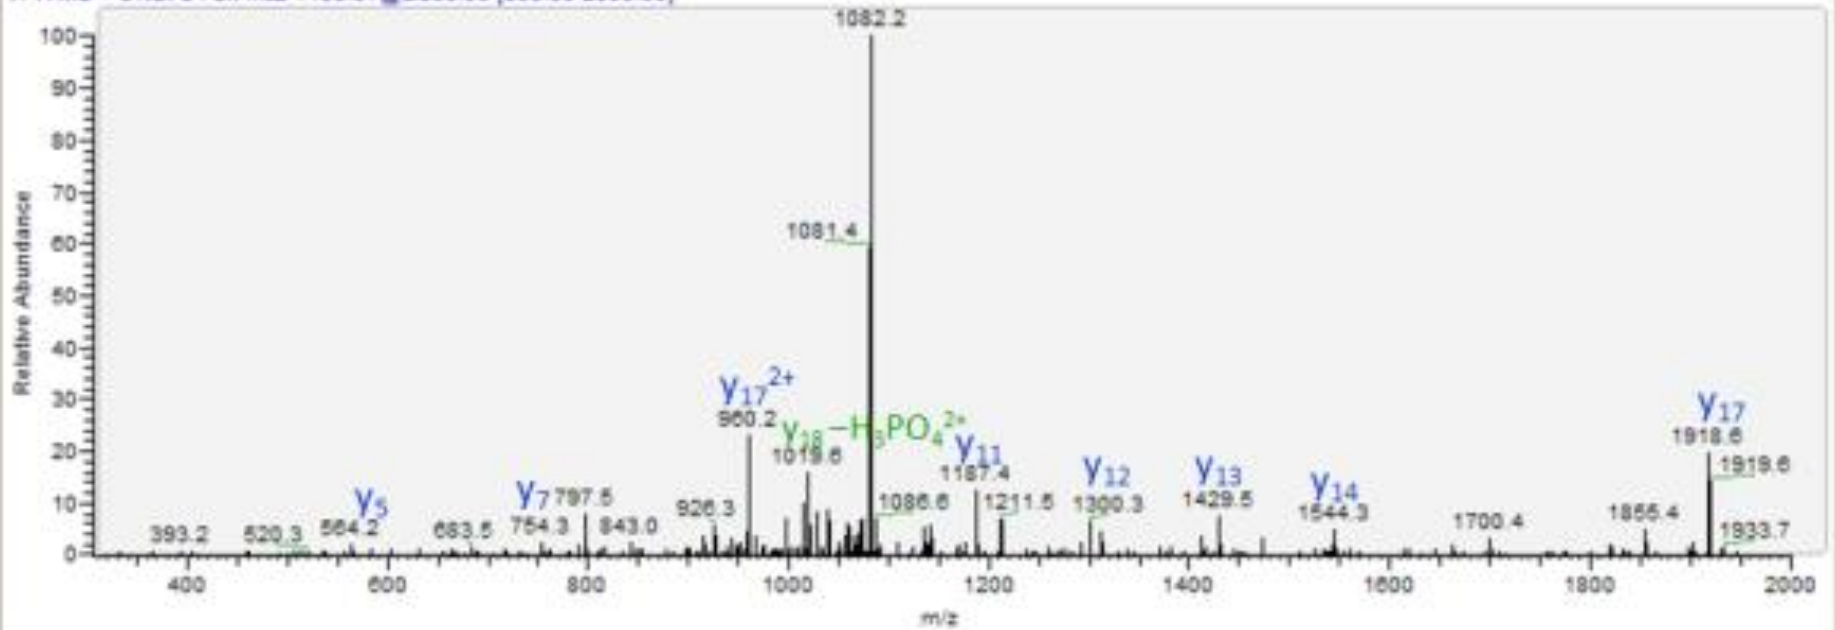

rpmE

pSTVGHDLNLDVCGK

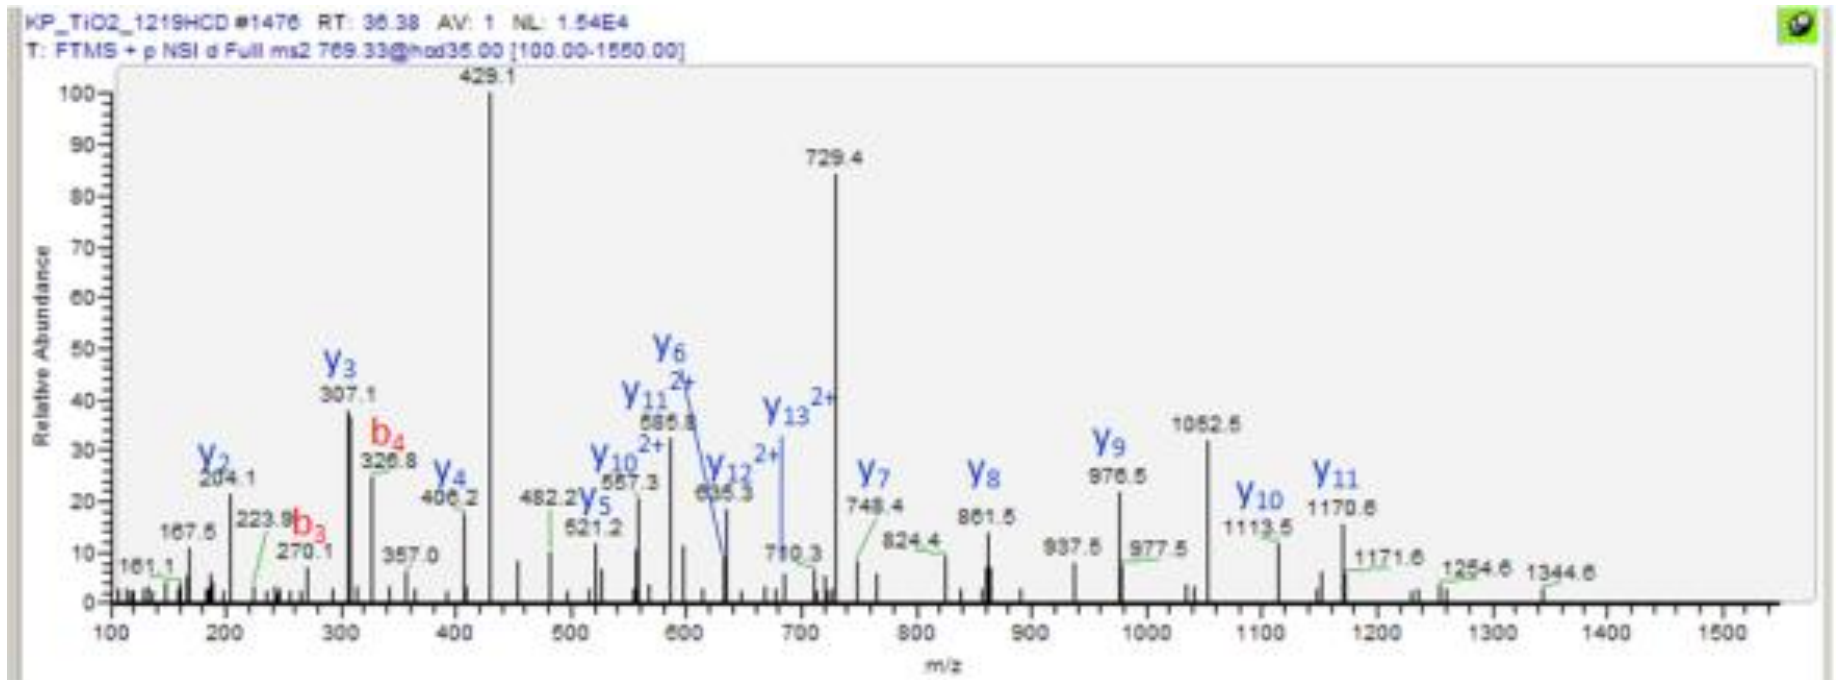

rpoB

p[STGSY]SLVTQQPLGGK

KP-IP-TiO2-080115 #4621 RT: 78.08 AV: 1 NL: 1.00E2  
T: ITMS + c NSI d Full ms2 851.91@cid35.00 [220.00-1715.00]

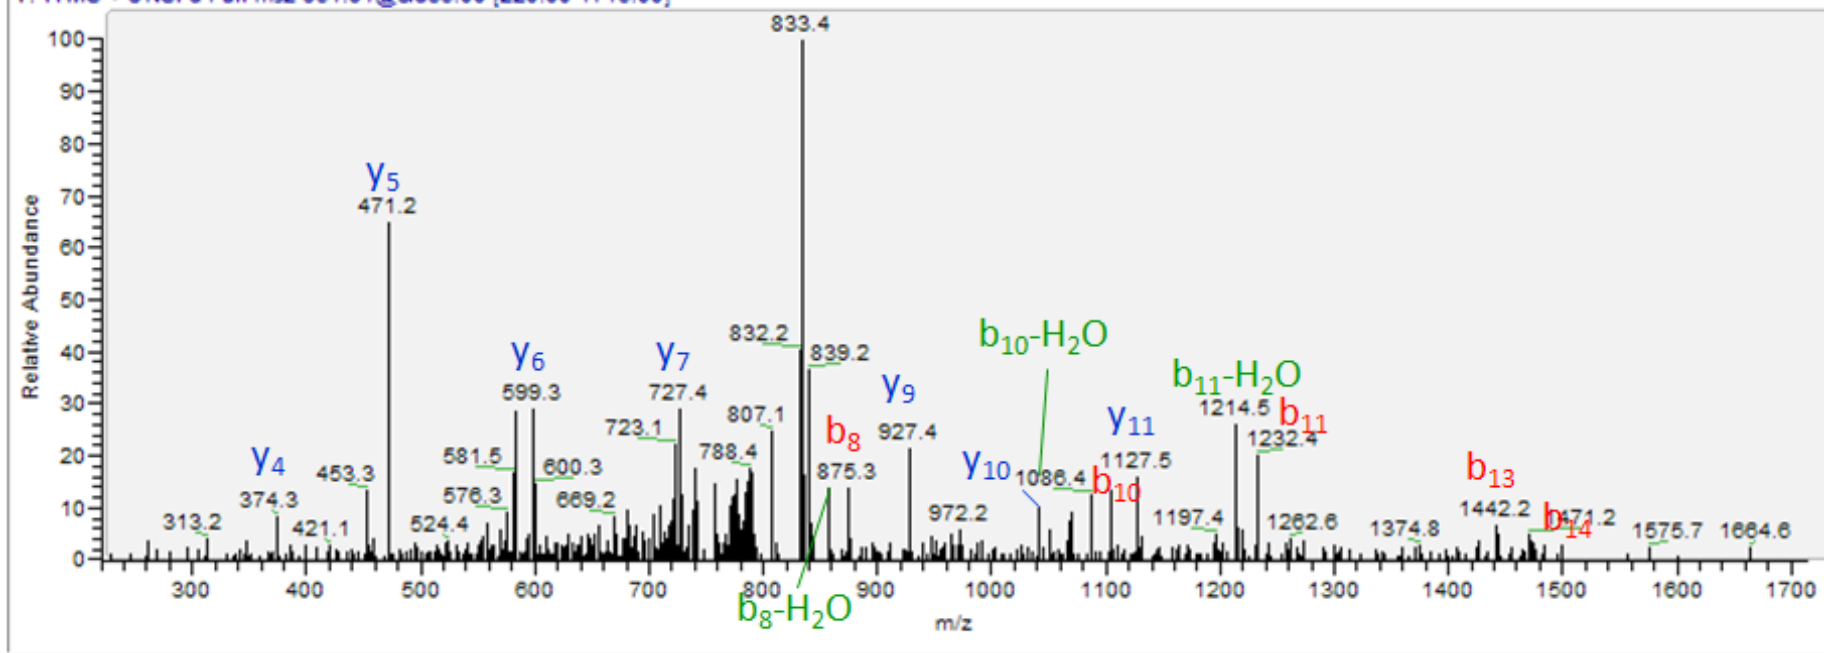

rpoC

NM<sup>p</sup>DLEQECEQLREELNETNSETK

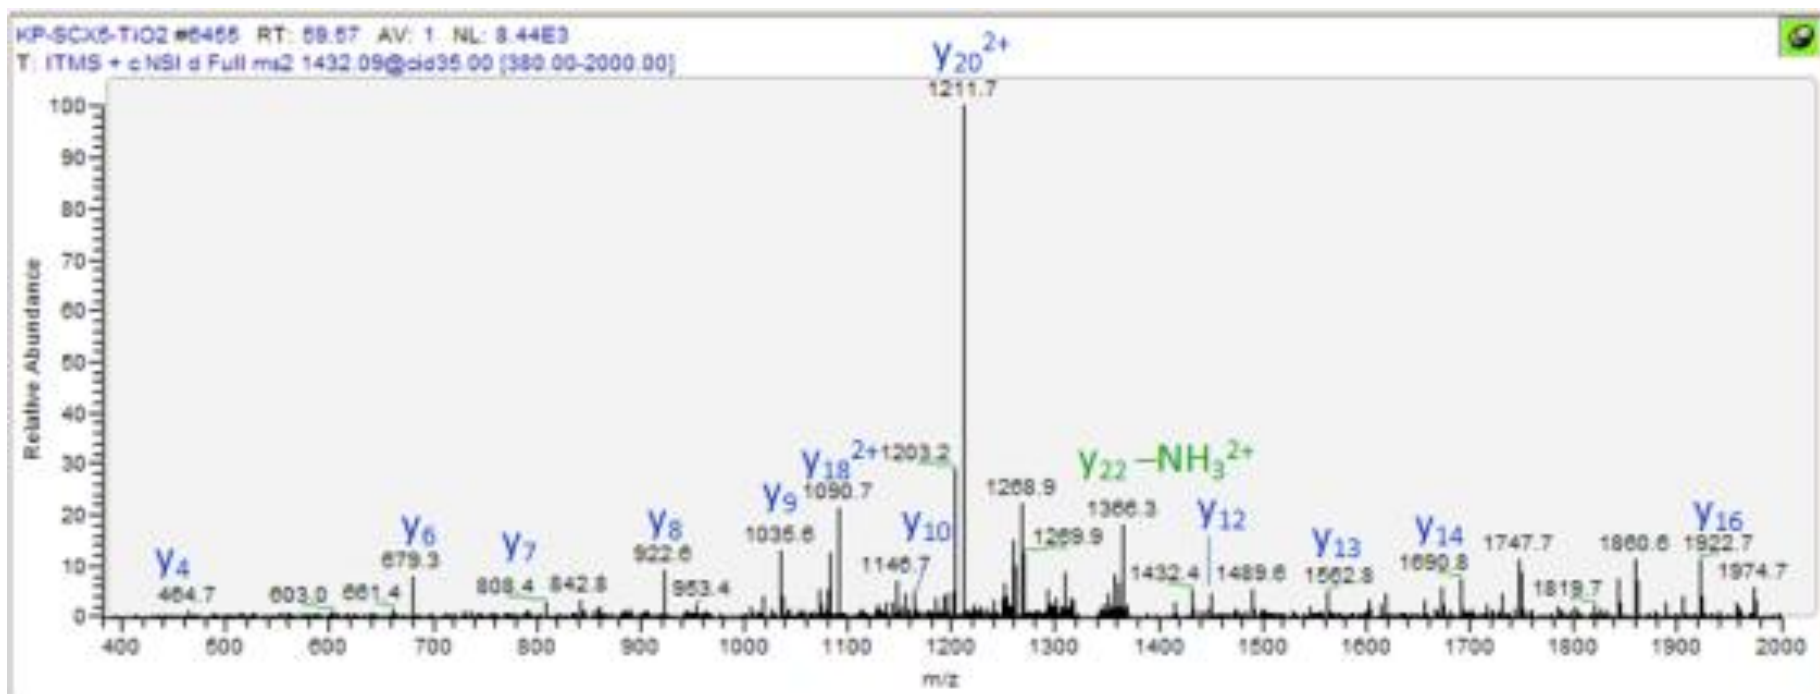



rpsA

pSNPWQQAETHNK

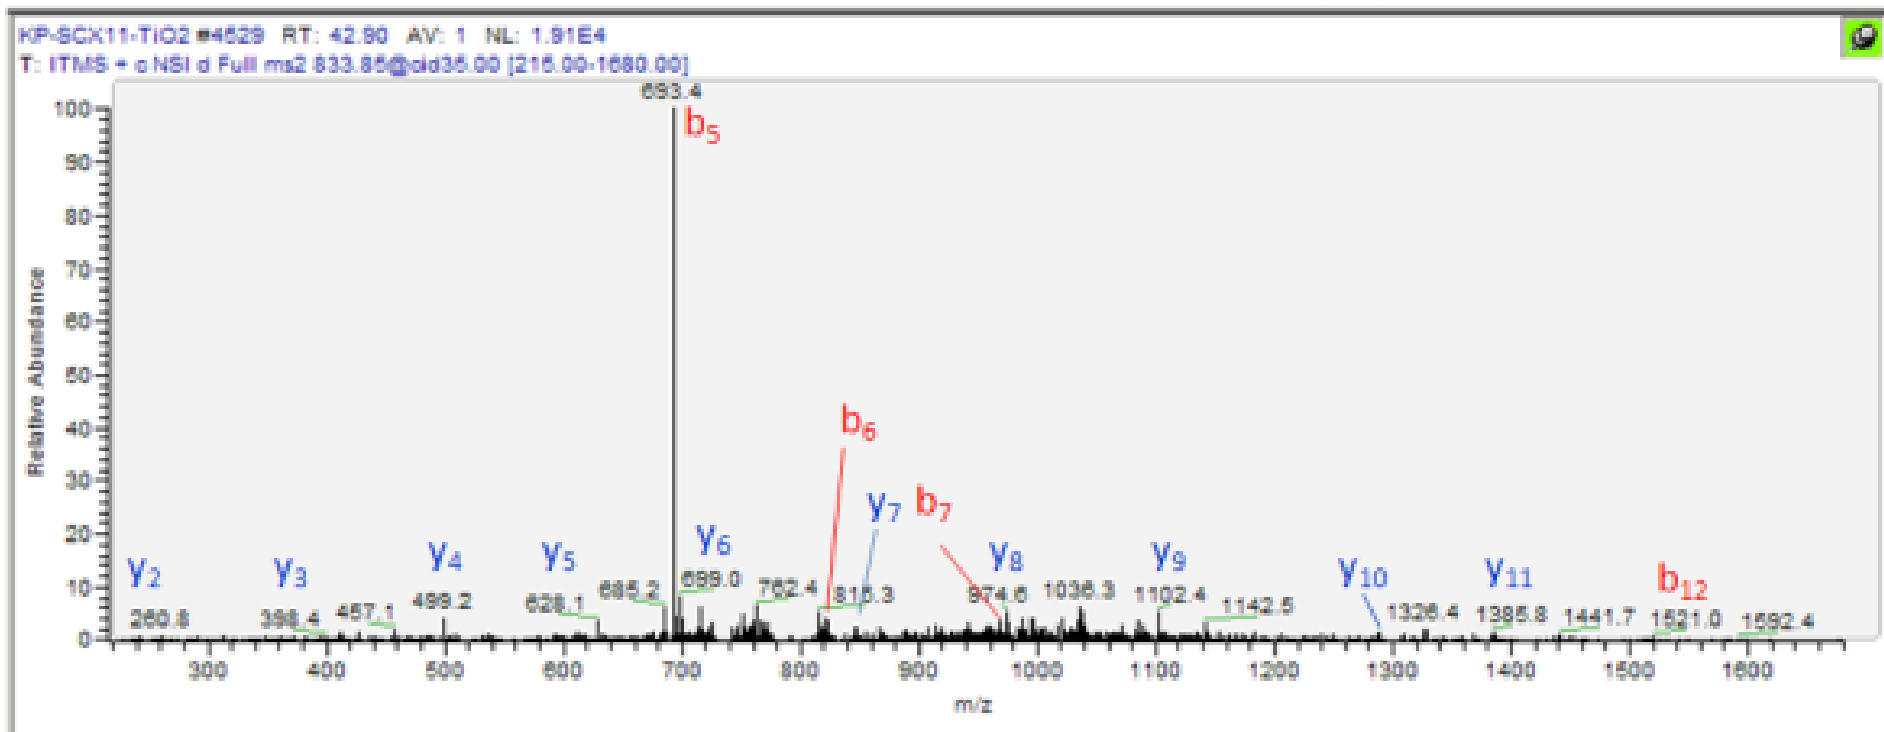

rpsB

pDAALSCDQFFVNHR

KP-SGX10-TIO2 #5161 RT: 50.22 AV: 1 NL: 1.01E3  
T: ITMS + e NSI d Full ms2 851.85@cid35.00 [220.00-1715.00]

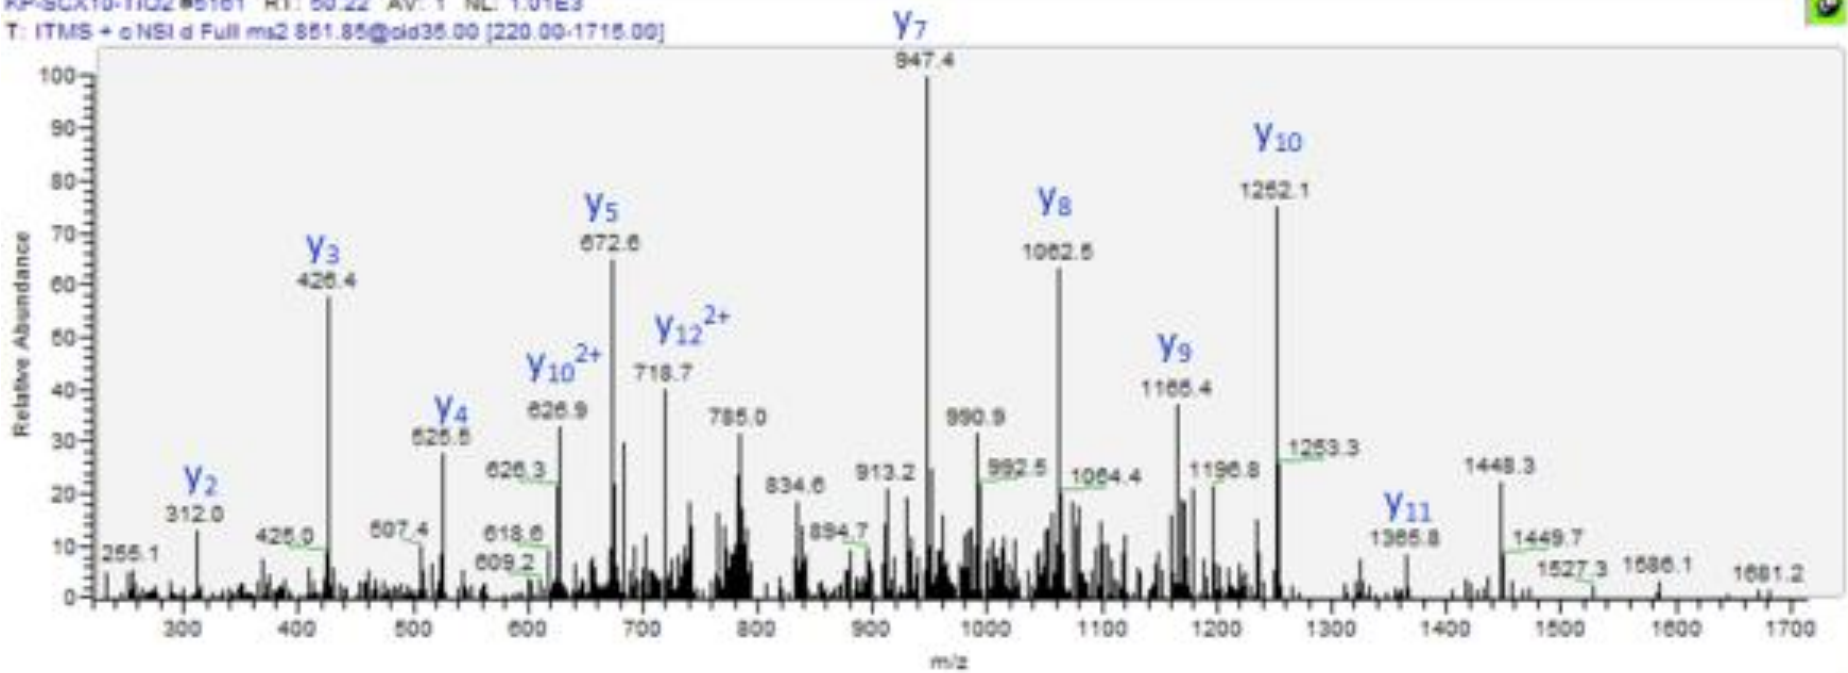

rpsl  
AENQpYYGTGR

KP-IP-TiO2-080115 #3194 RT: 62.01 AV: 1 NL: 6.00E2  
T: ITMS + c NSI d Full ms2 619.74@cid35.00 [160.00-1250.00]

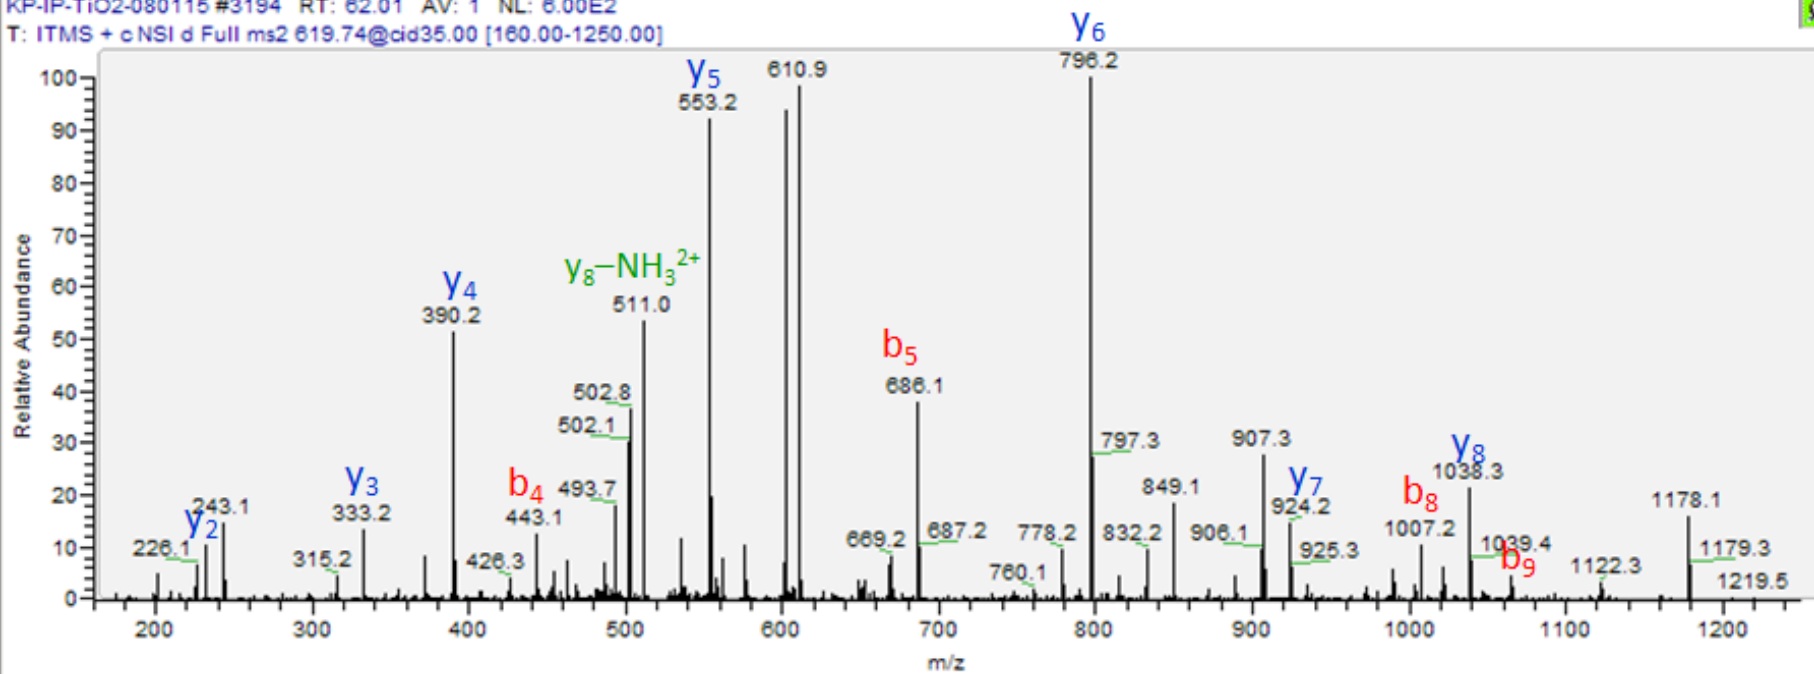

rpsL

pSNVPALEACPQKR

CP\_TiO2\_1219HCD #1142 RT: 28.41 AV: 1 NL: 1.74E4  
1: FTMS + p NSI d Full ms2 746.85@hod35.00 [100.00-1505.00]

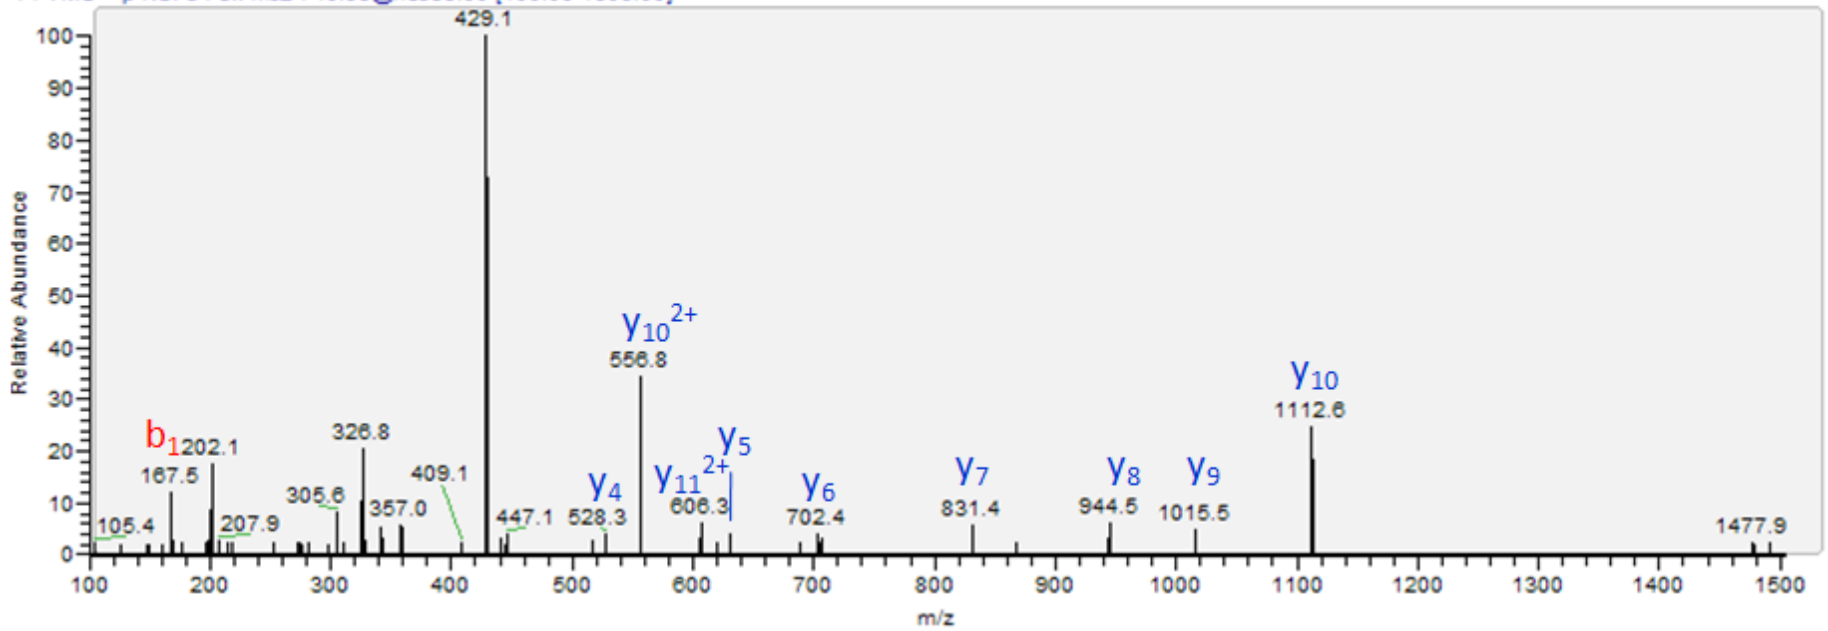

rpsQ  
LpHVHDENNECGIGDK

KP-SGX9-1102#1935 RT: 23.03 AV: 1 NL: 3.45E2  
T: ITMS + c NSI d Full ms2 880.36@cid35.00 [230.00-1775.00]

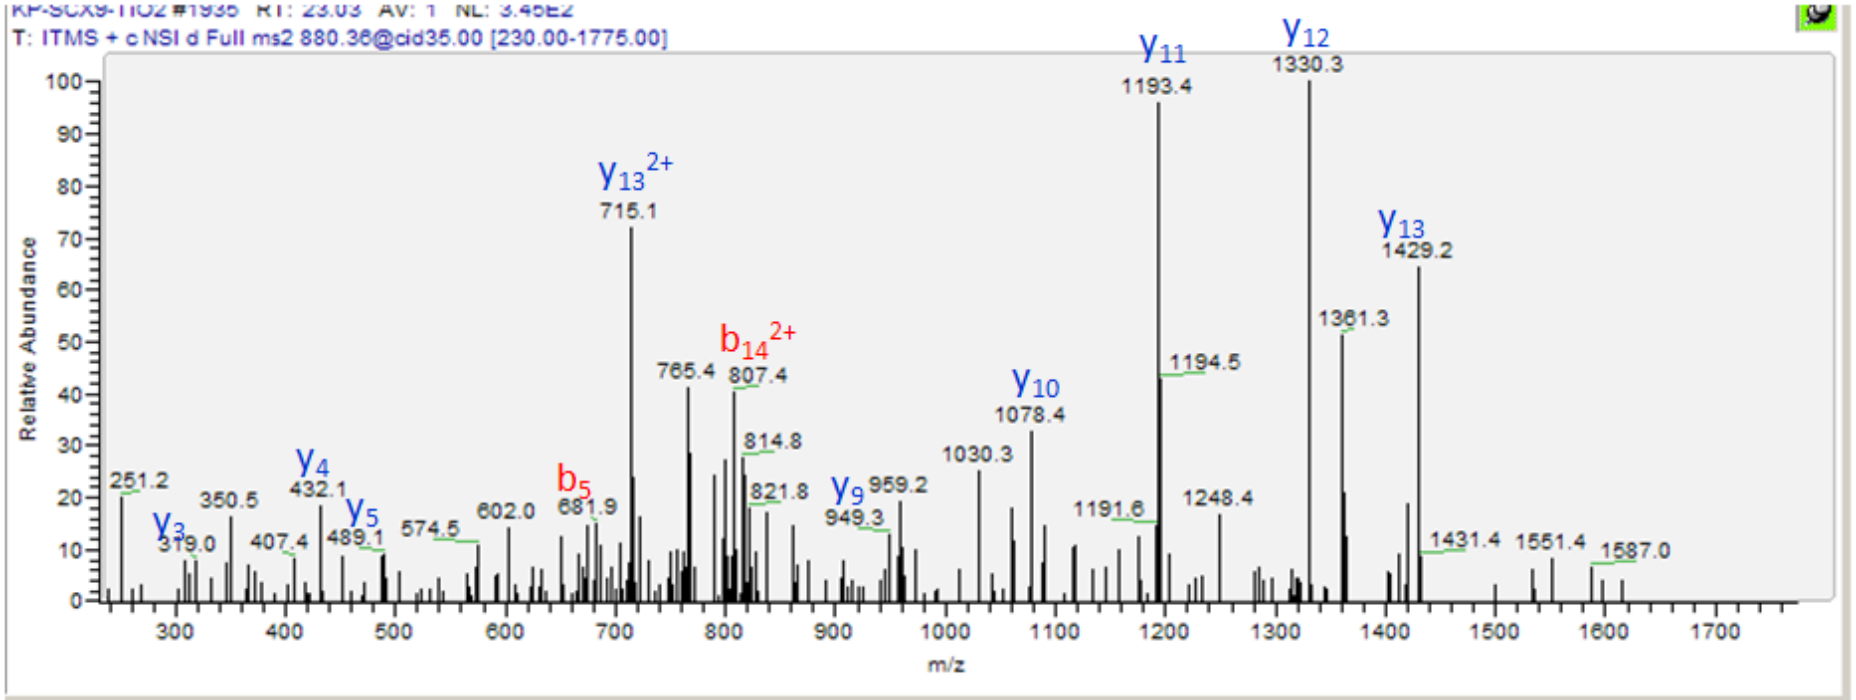

terZ

SpSCGSVVHSGDNLTGEGDGDDEIIHVNLLK

KP-SCX5-TiO2 #5988 RT: 55.50 AV: 1 NL: 6.01E3

T: ITMS + cNSI d Full ms2 1050.13@cid35.00 [275.00-2000.00]

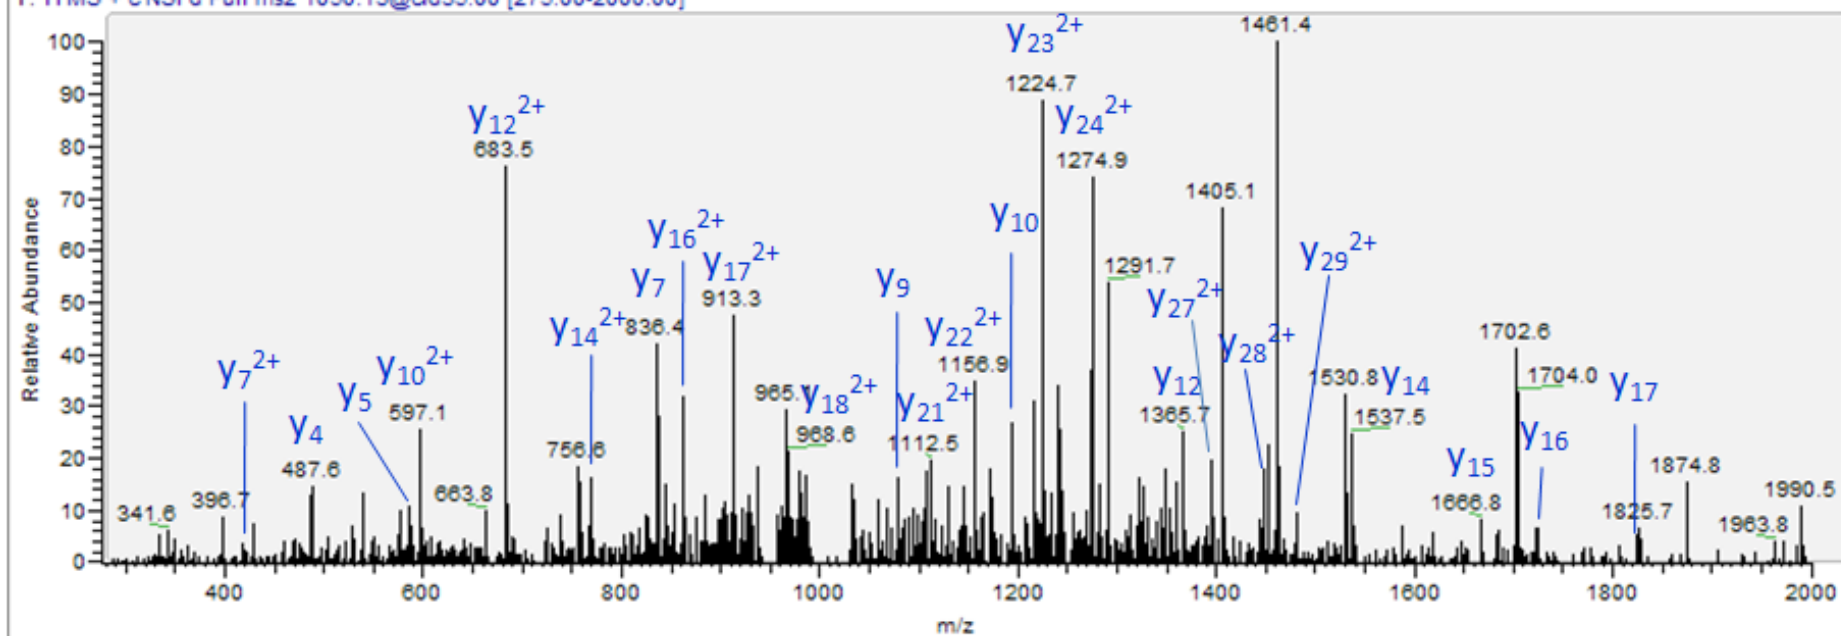

tufB

EGGR<sup>p</sup>TVGAGVVAK

KP-SCX1-TiO2 #4425 RT: 47.20 AV: 1 NL: 4.81E3  
T: ITMS + c NSI d Full ms2 640.82@cid35.00 [165.00-1295.00]

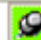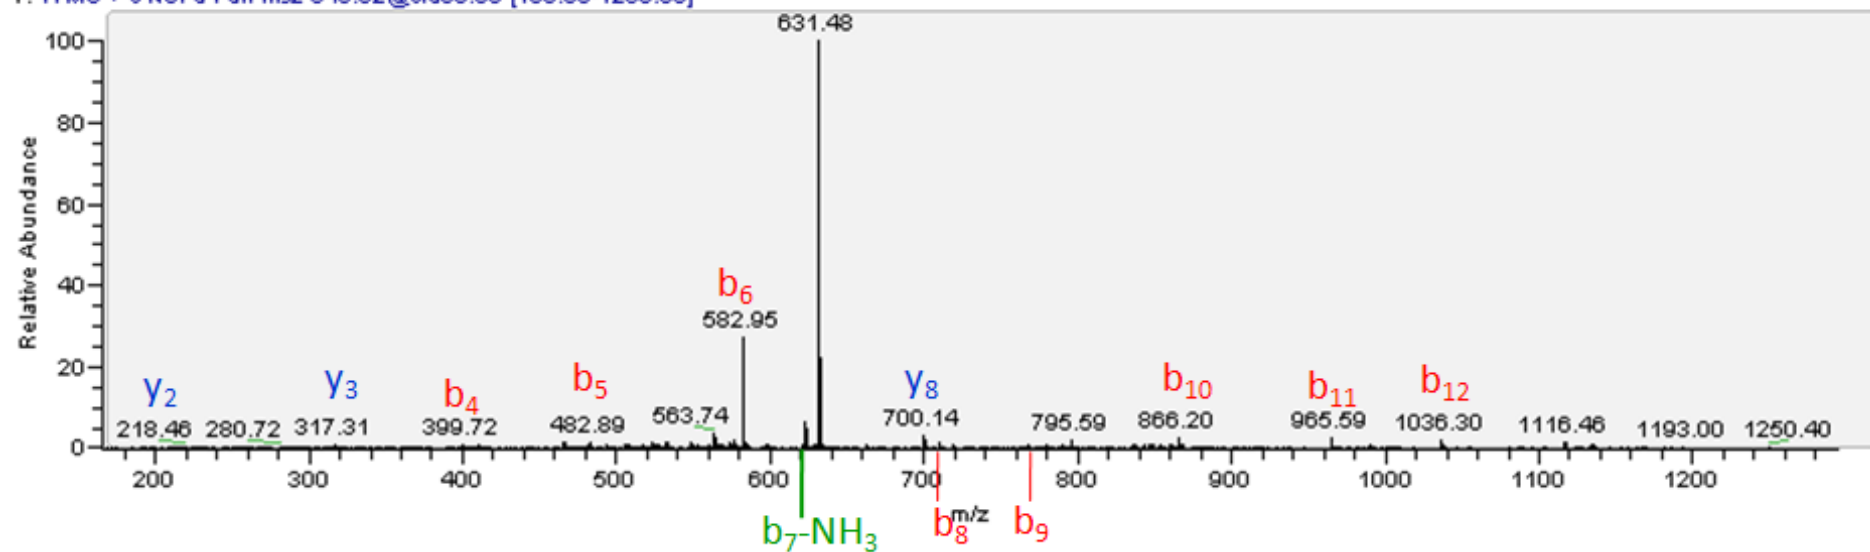

tufB

pHYAHVDCPGHADYVK

KP-SCX15-TiO2 #2173 RT: 23.39 AV: 1 NL: 1.91E4

T: ITMS + c NSI d Full ms2 597.91@cid35.00 [150.00-1805.00]

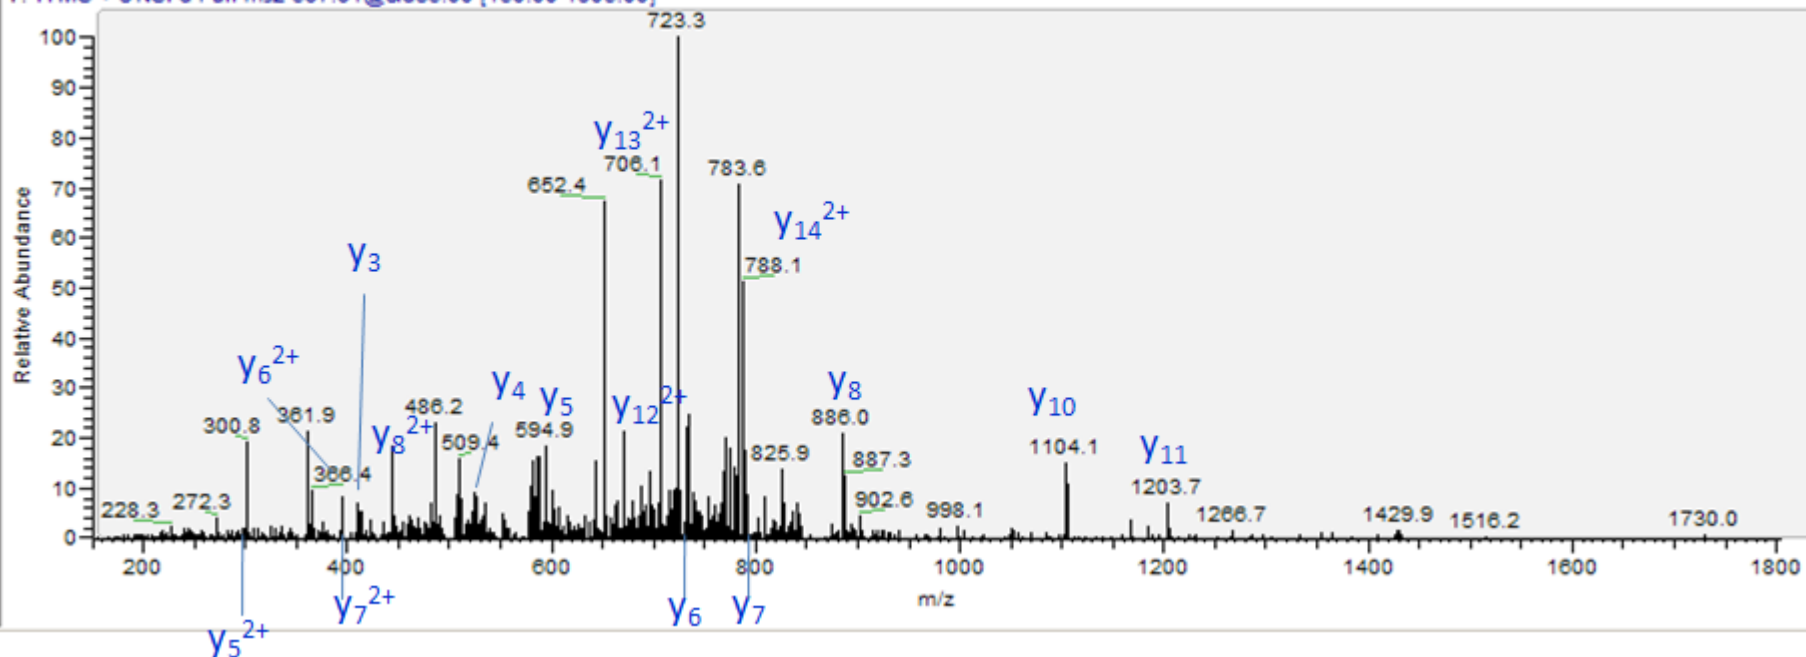



uxaC

pDQPIFDYHCHLPPQQAENYR

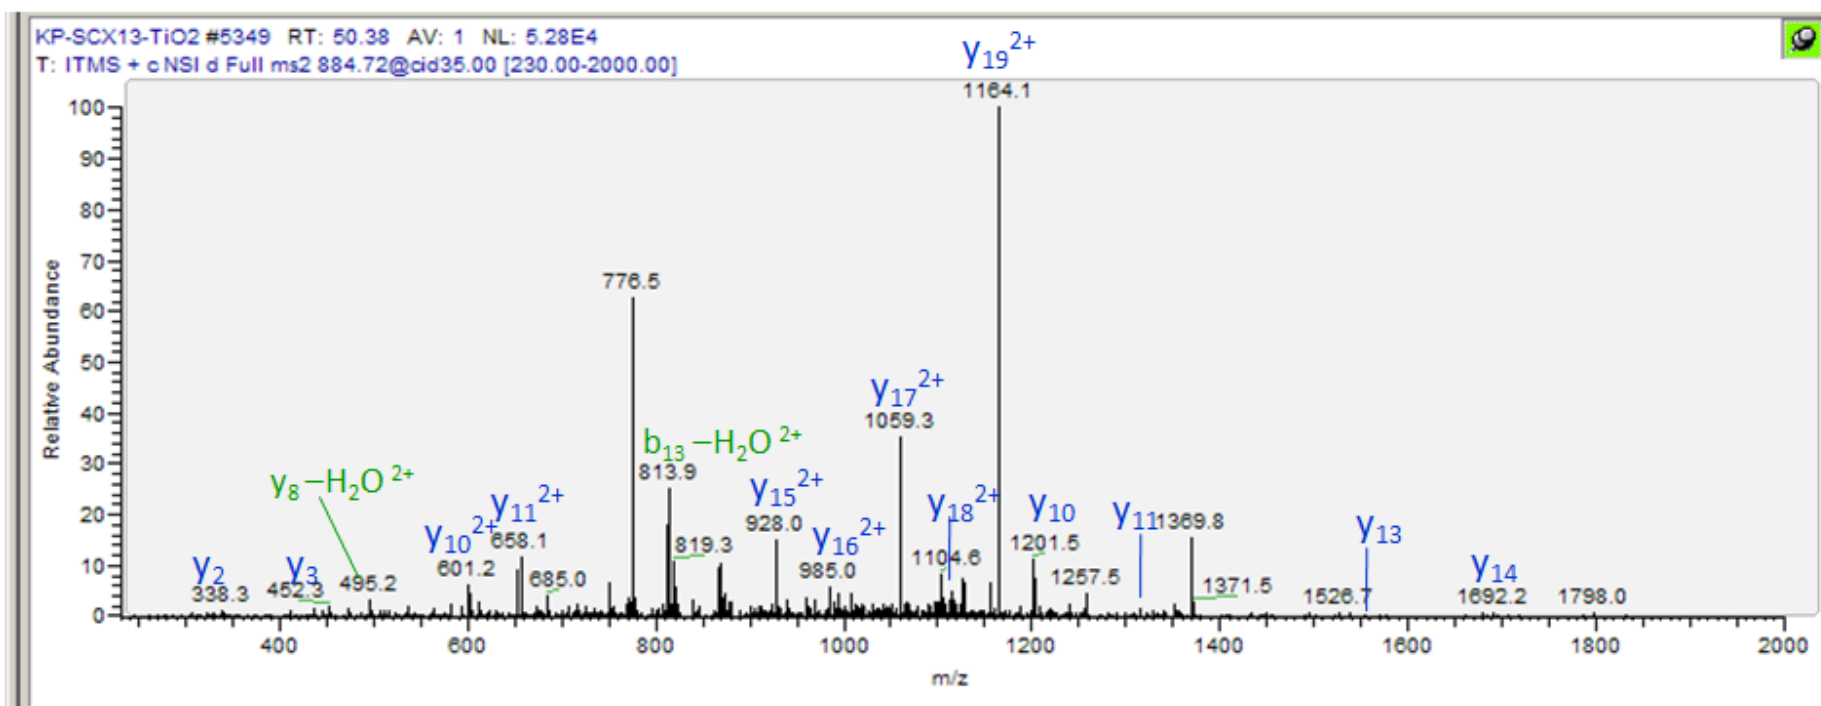

wcaJ  
ATLpYHR

KP-IP-TiO2-080115 #3244 RT: 62.56 AV: 1 NL: 1.81E3  
T: ITMS + c NSI d Full ms2 420.69@cid35.00 [105.00-855.00]

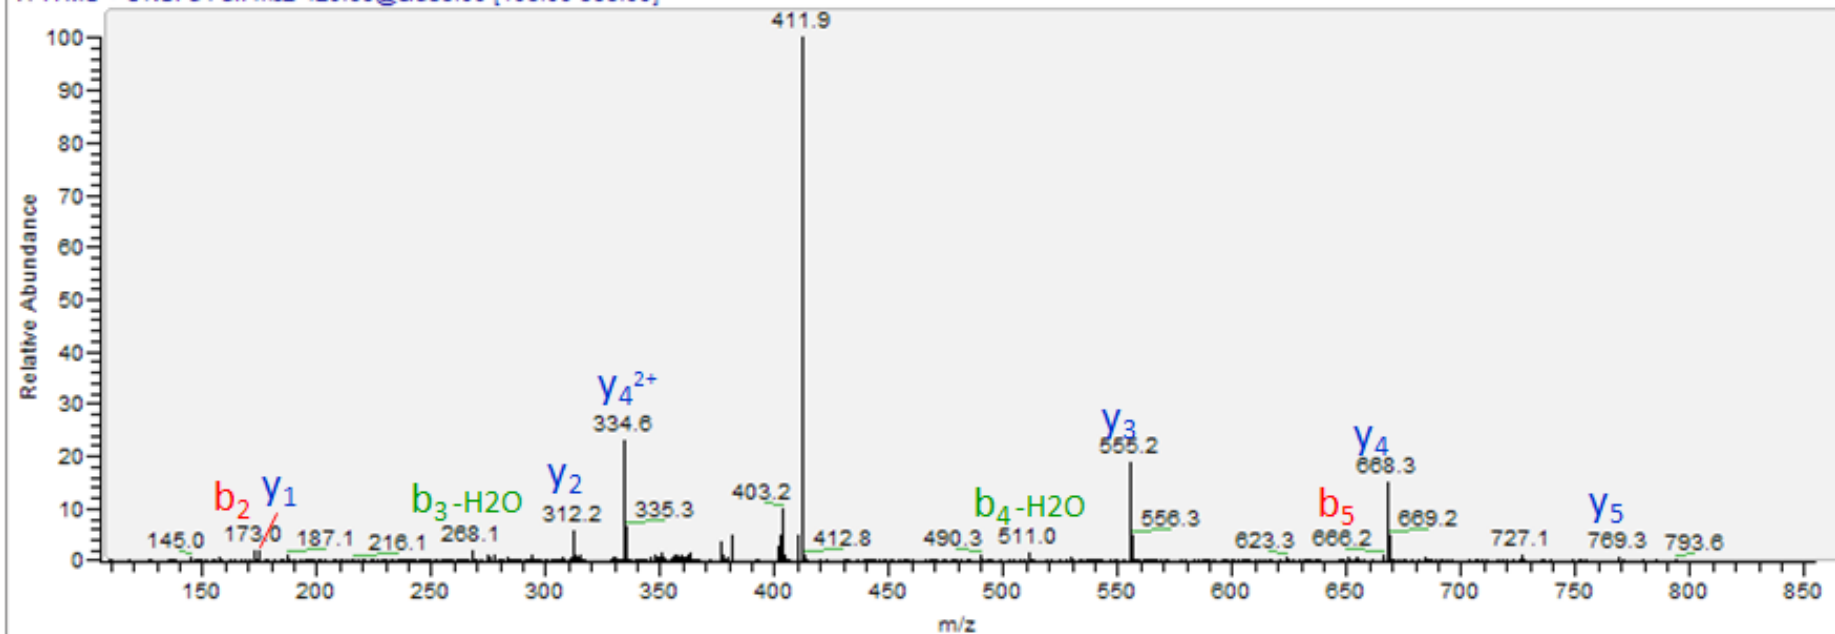

WZC

QQNSpSVDLTMEAK

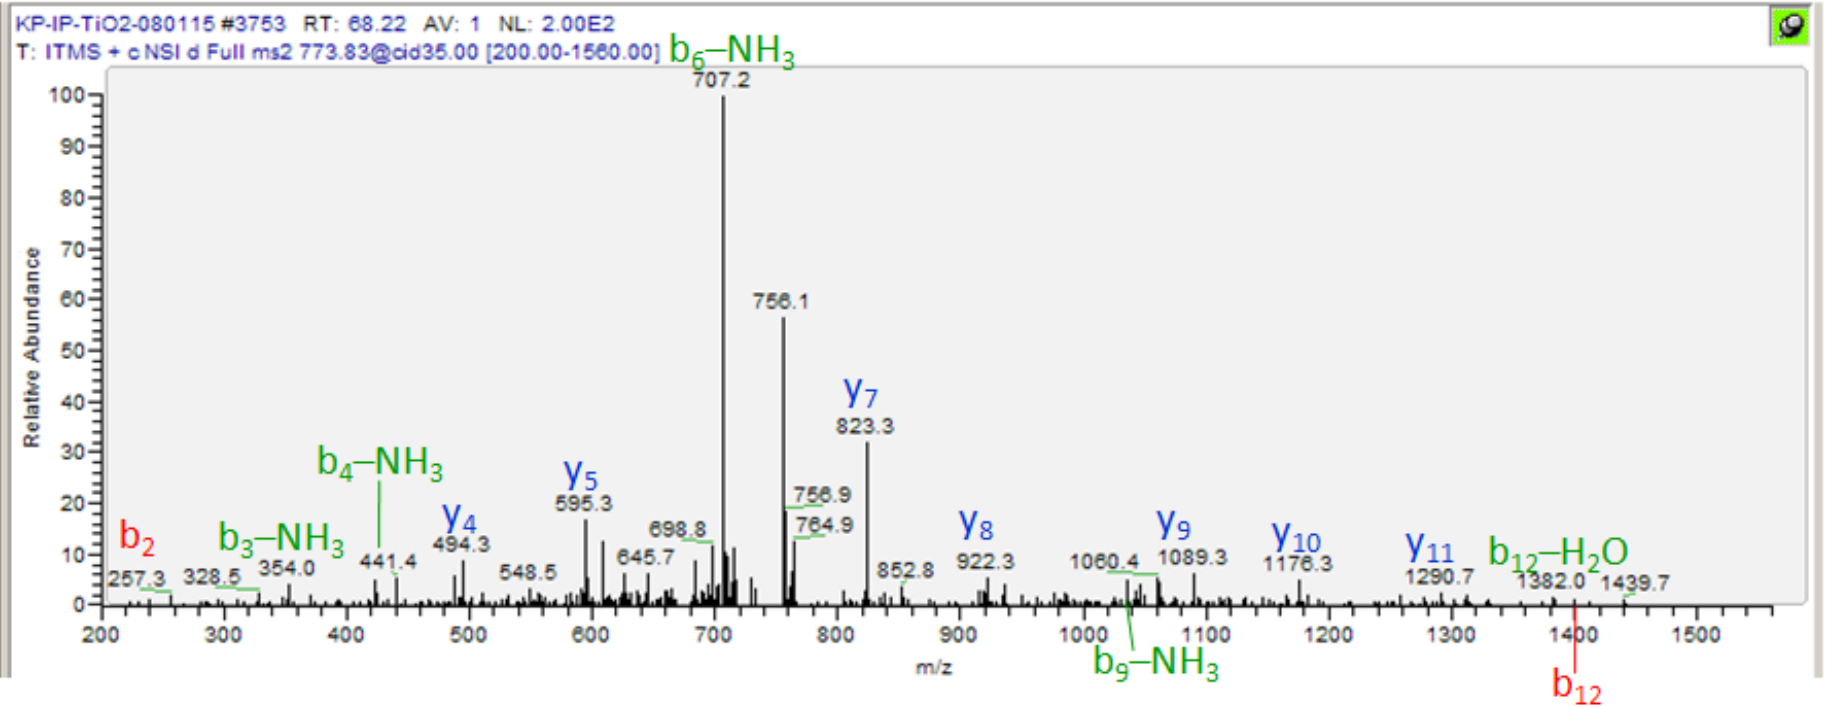

WZC

INNLPepTQQEVLr

KP-TIO2 #4251 RT: 62.66 AV: 1 NL: 1.50E4

T: ITMS + c NSI d Full ms2 817.40@cid35.00 [215.00-1645.00]

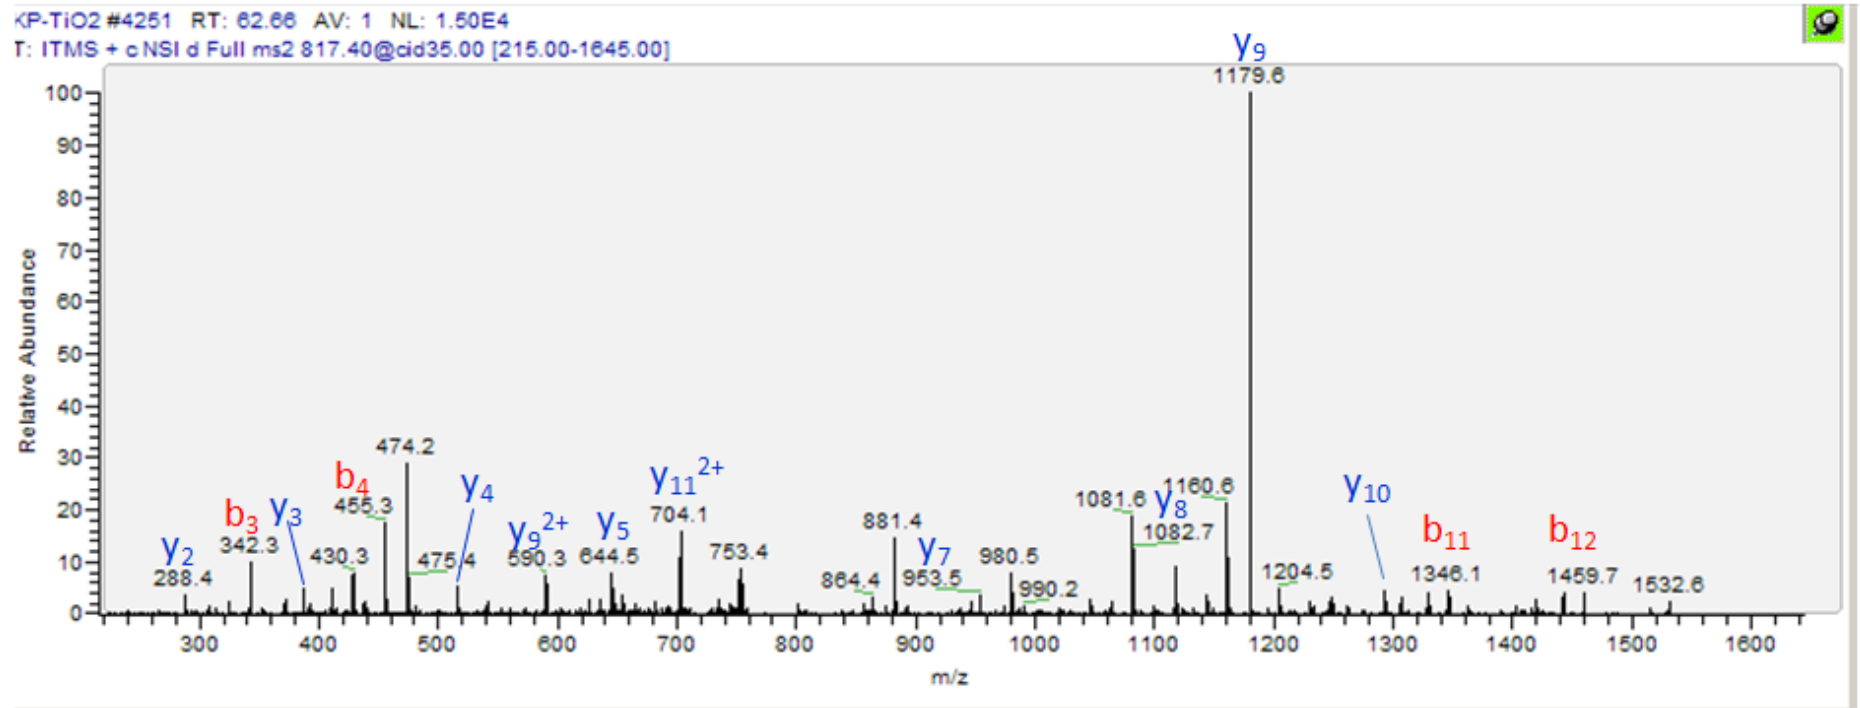

WZC

NNILMISGPpSPEIGK

KP-TiO2 #5121 RT: 70.48 AV: 1 NL: 1.11E3

T: ITMS + c NSI d Full ms2 825.40@cid35.00 [215.00-1665.00]

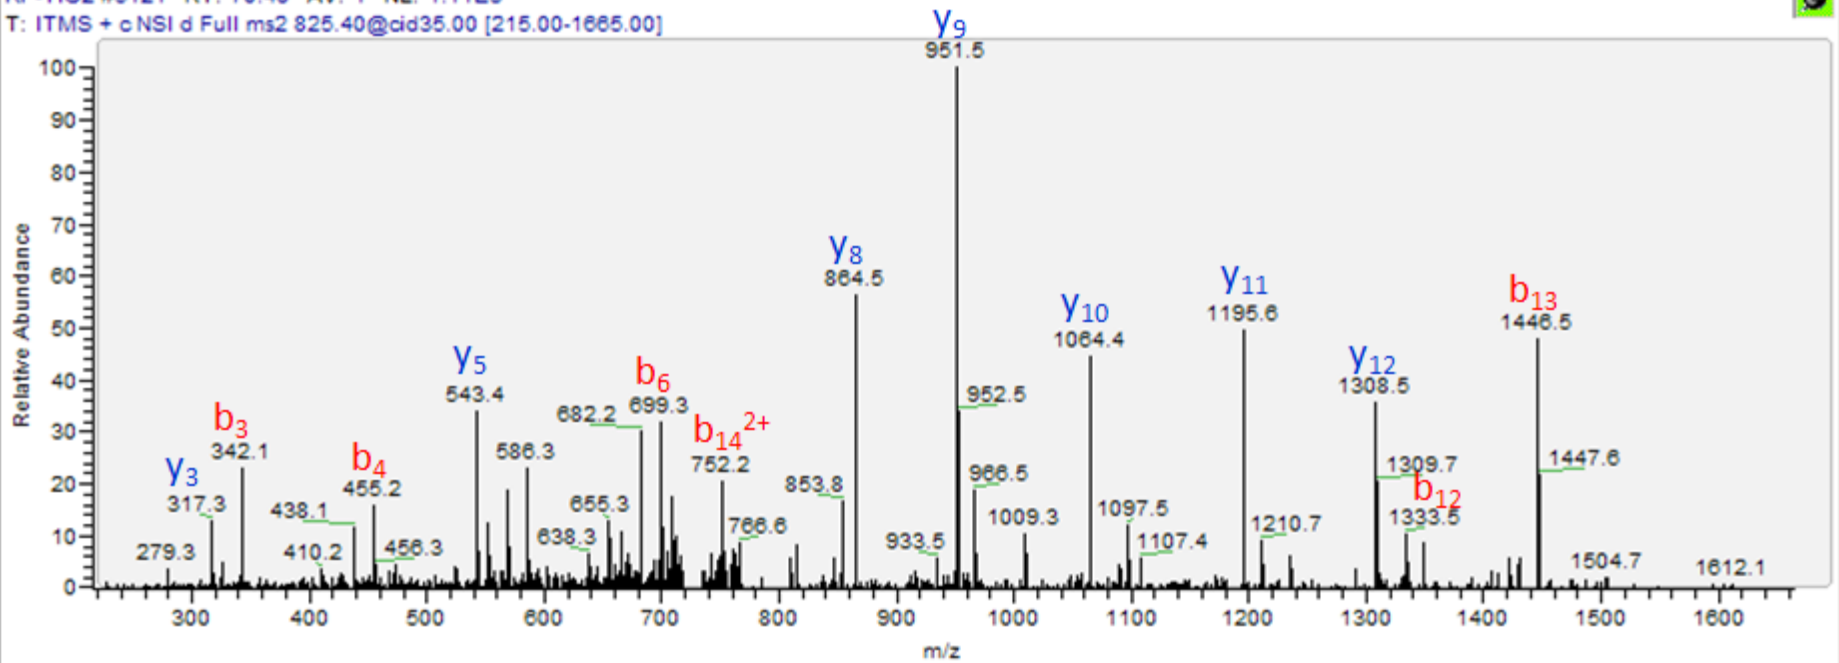

WZC

TFVp[ST]NLAGVVAQAGQK

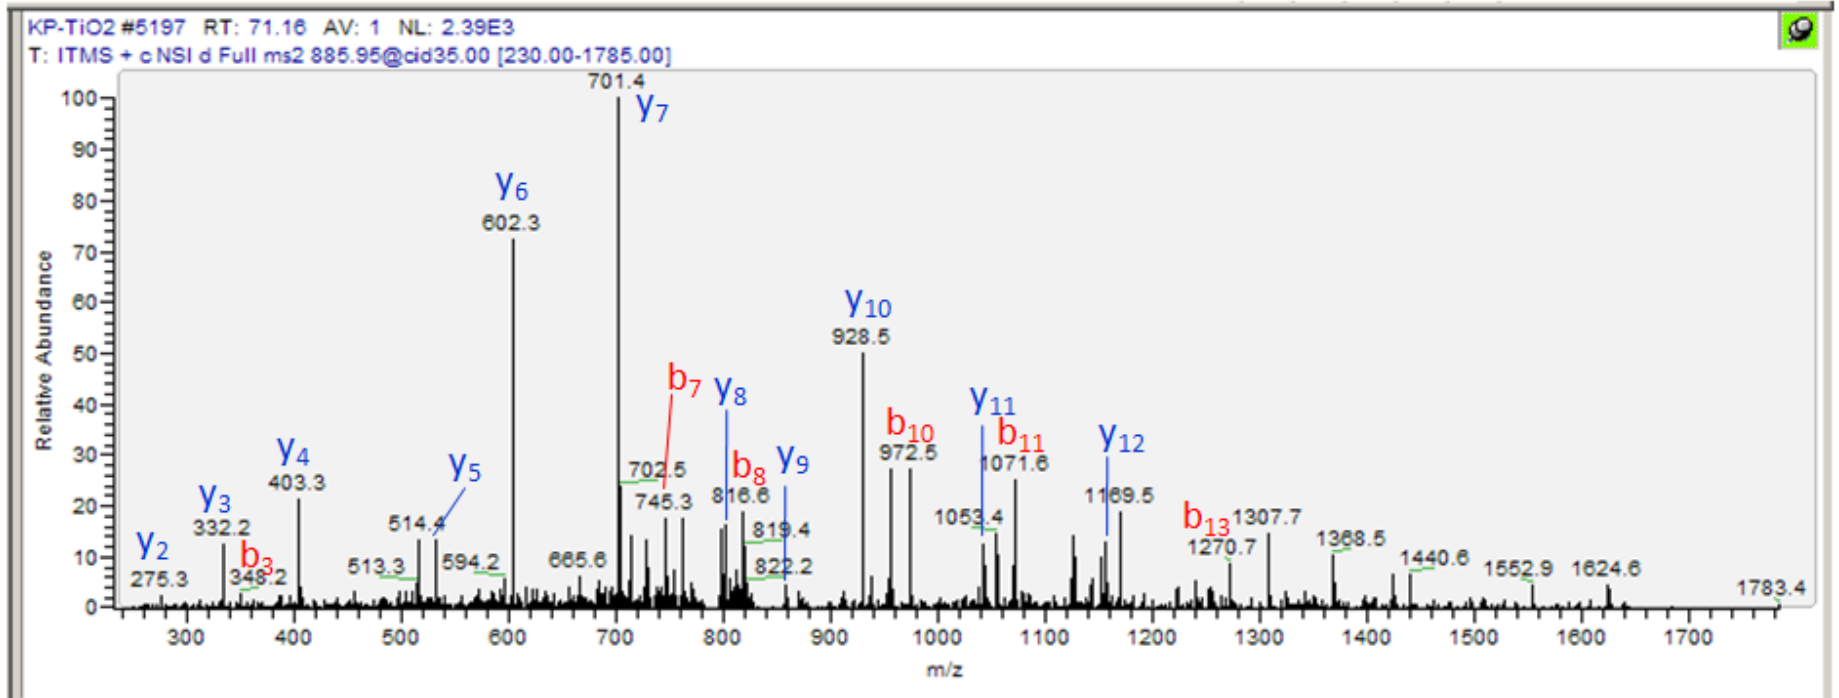

WZC

YGEYAYpYE<sup>p</sup>YE<sup>p</sup>YKSKE

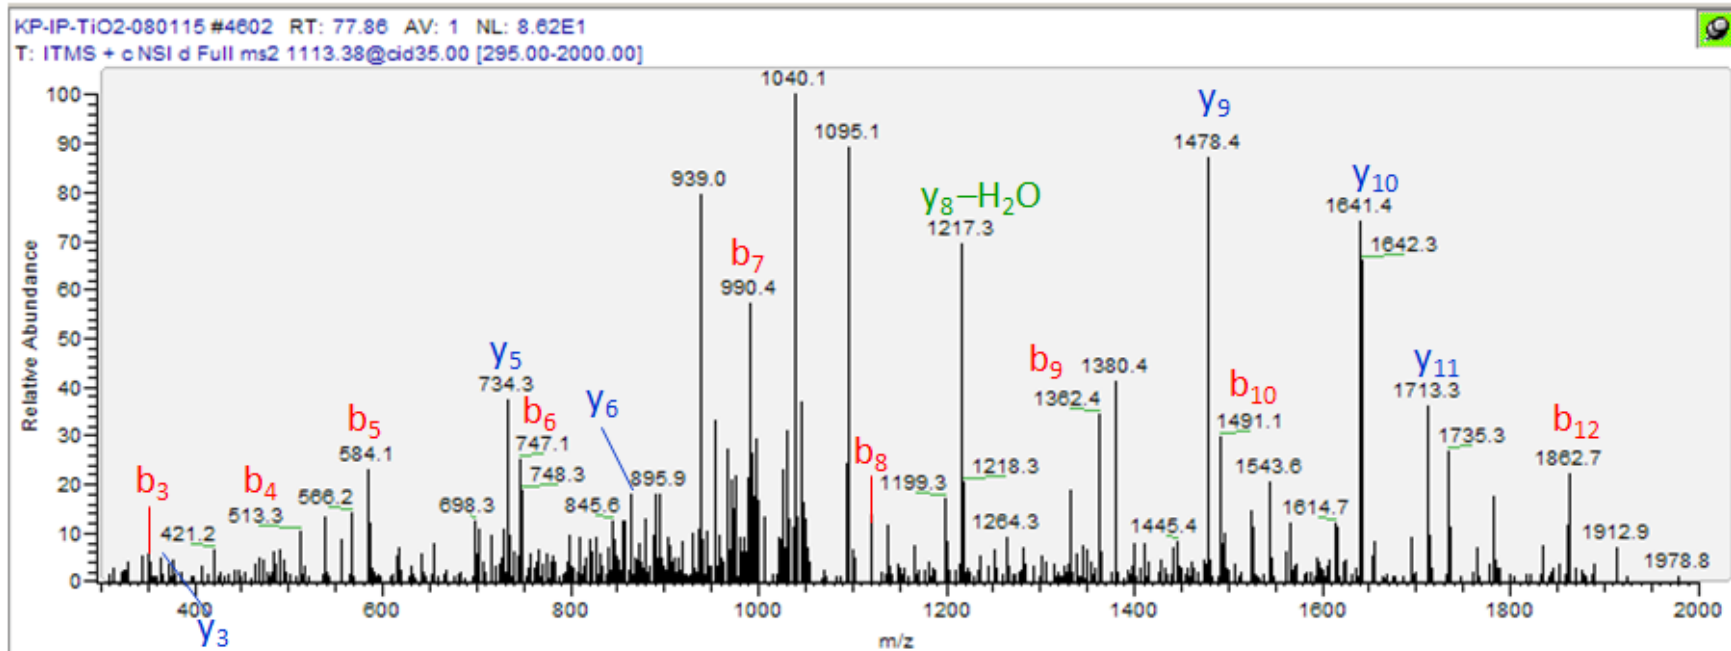

WZC

YGEYAYYEYE**pYK**

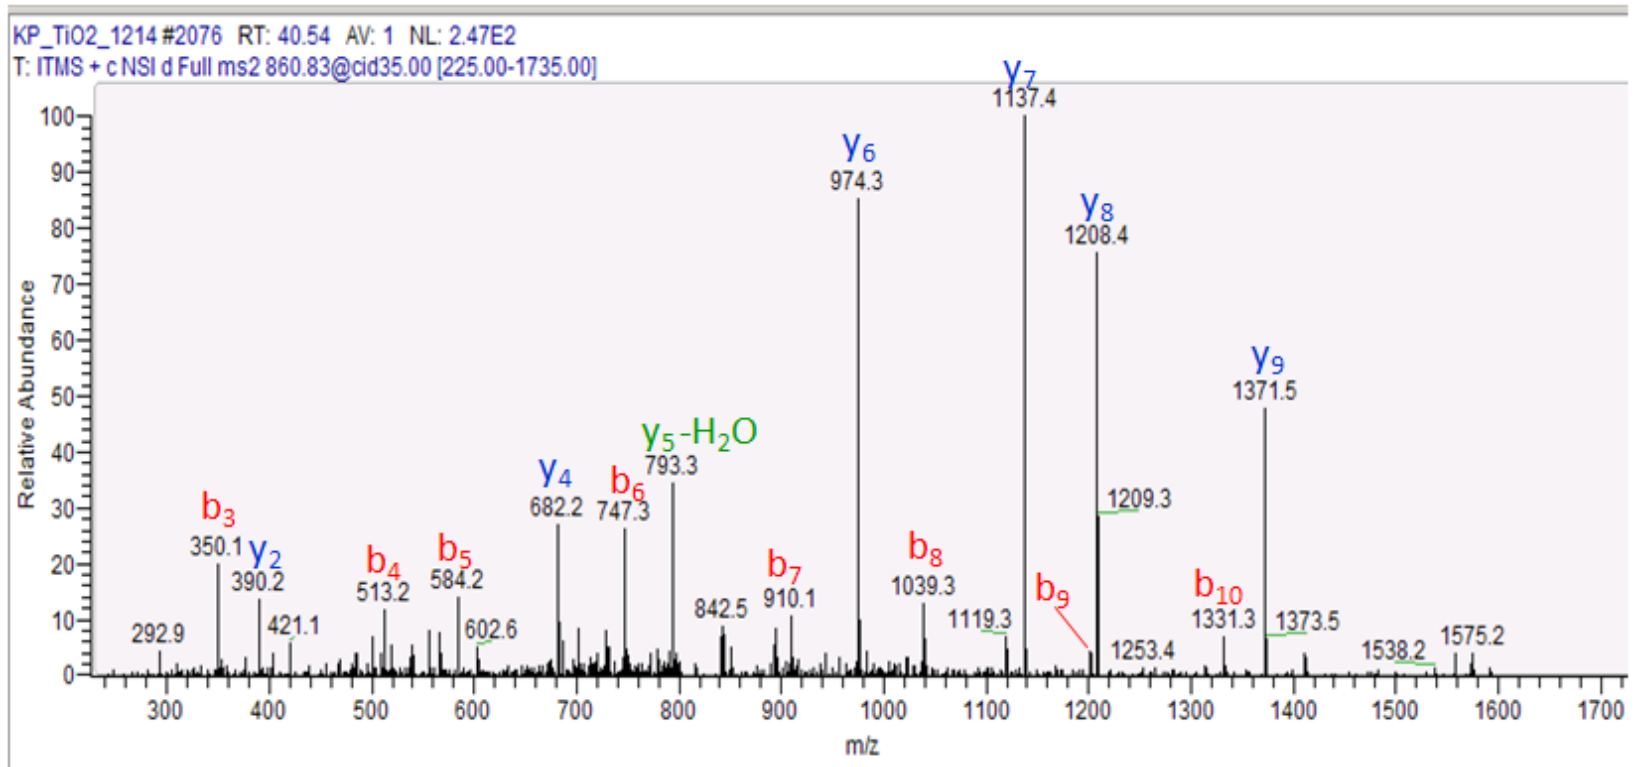



WZC

pYGEYAYYEpYEYK

KP-IP-TiO2-080115 #4893 RT: 81.47 AV: 1 NL: 9.62E1  
T: ITMS + c NSI d Full ms2 900.81@cid35.00 [235.00-1815.00]

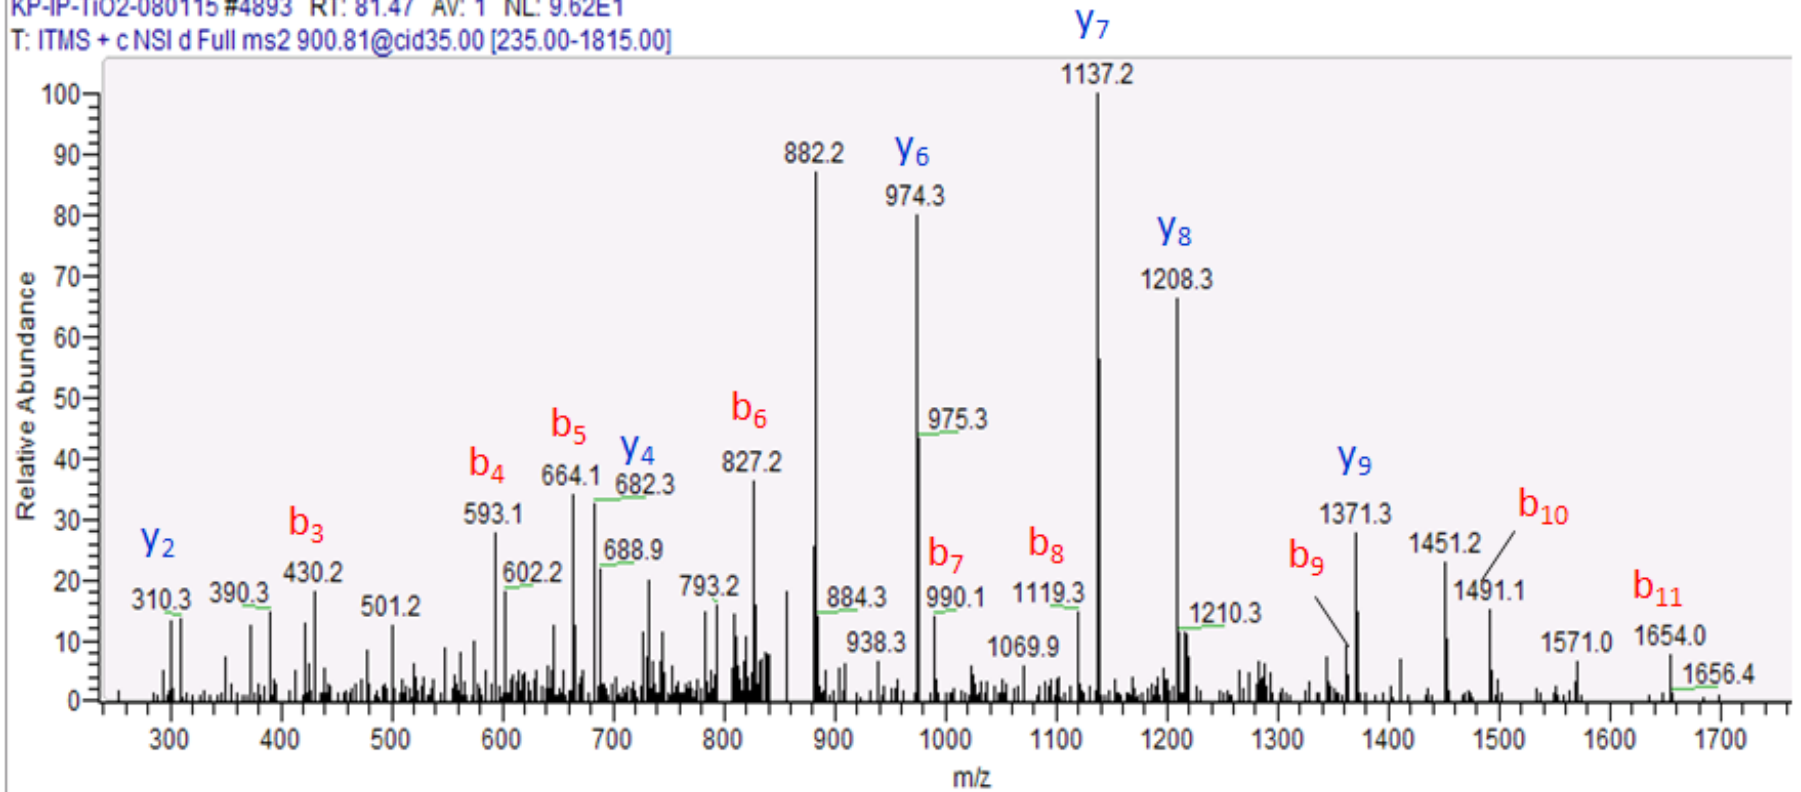

WZC

YGEYApYYEYEpYK

KP\_TiO2\_1214 #1854 RT: 37.28 AV: 1 NL: 5.14E1  
T: ITMS + c NSI d Full ms2 901.31@cid35.00 [235.00-1815.00]

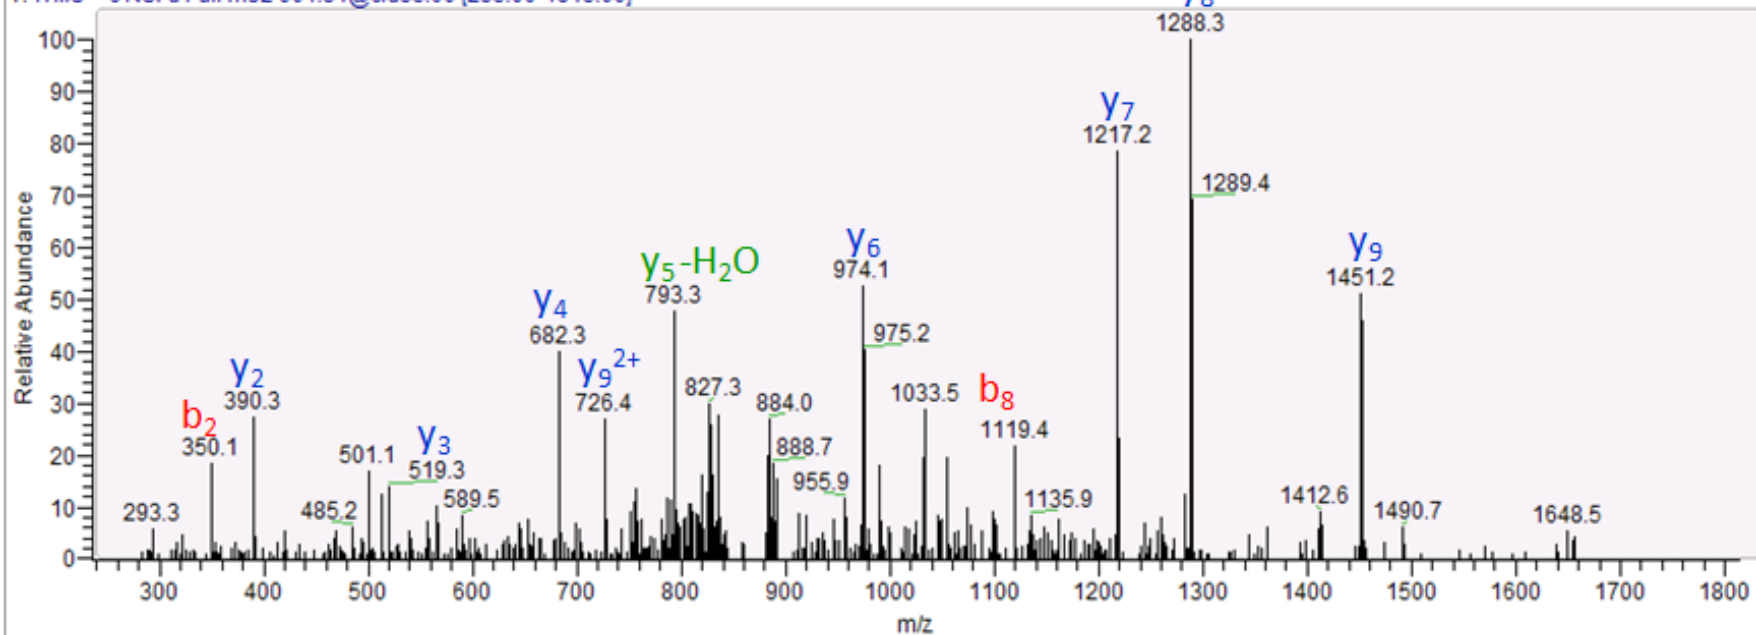

WZC

pYGEYAYEYEpYK

KP-IP-TIO2-080115 #4885 RT: 81.35 AV: 1 NL: 6.34E1

T: ITMS + c NSI d Full ms2 900.81@cid35.00 [235.00-1815.00]

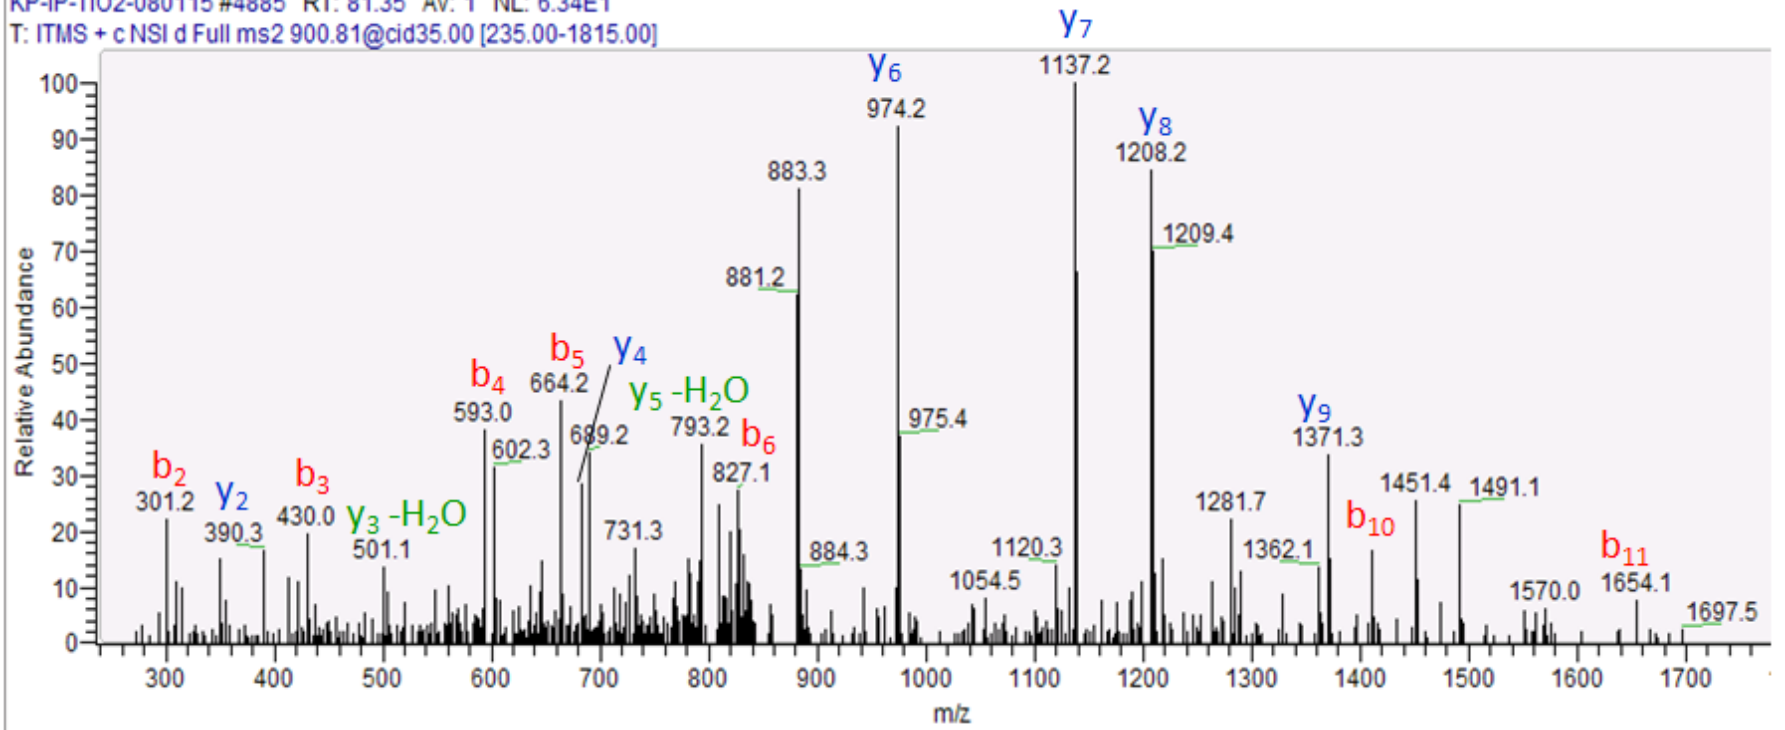

WZC

YGEYApYYEpYEp[YKSKE]

KP\_TiO2\_1219HCD #1438 RT: 35.47 AV: 1 NL: 1.49E4  
T: FTMS + p NSI d Full ms2 742.59@hcd35.00 [100.00-2000.00]

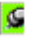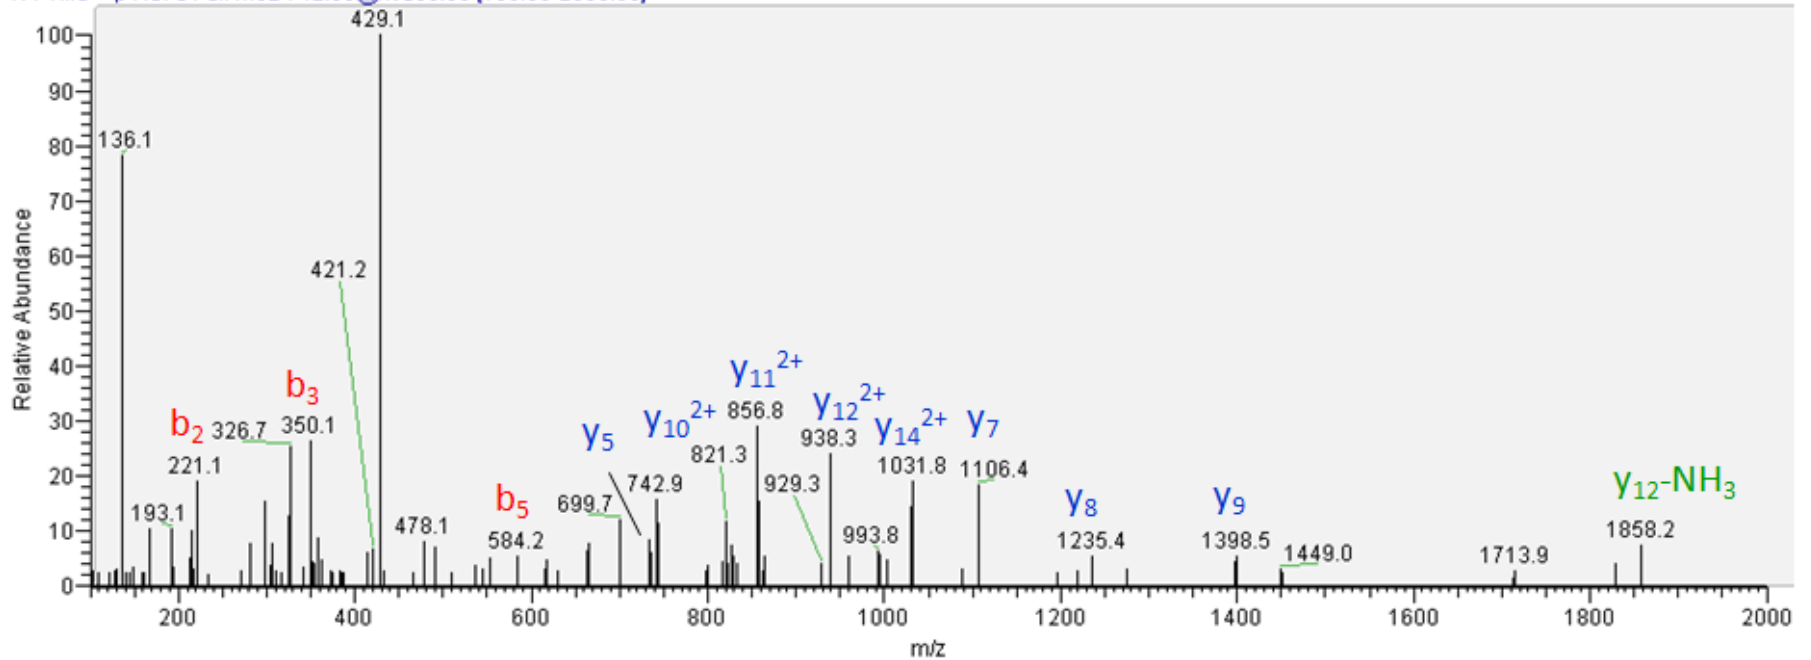

WZC

YGEYApYYEpYEYKSKE

KP\_TiO2\_1214 #2068 RT: 40.42 AV: 1 NL: 2.47E1  
T: ITMS + c NSI d Full ms2 1073.39@cid35.00 [285.00-2000.00]

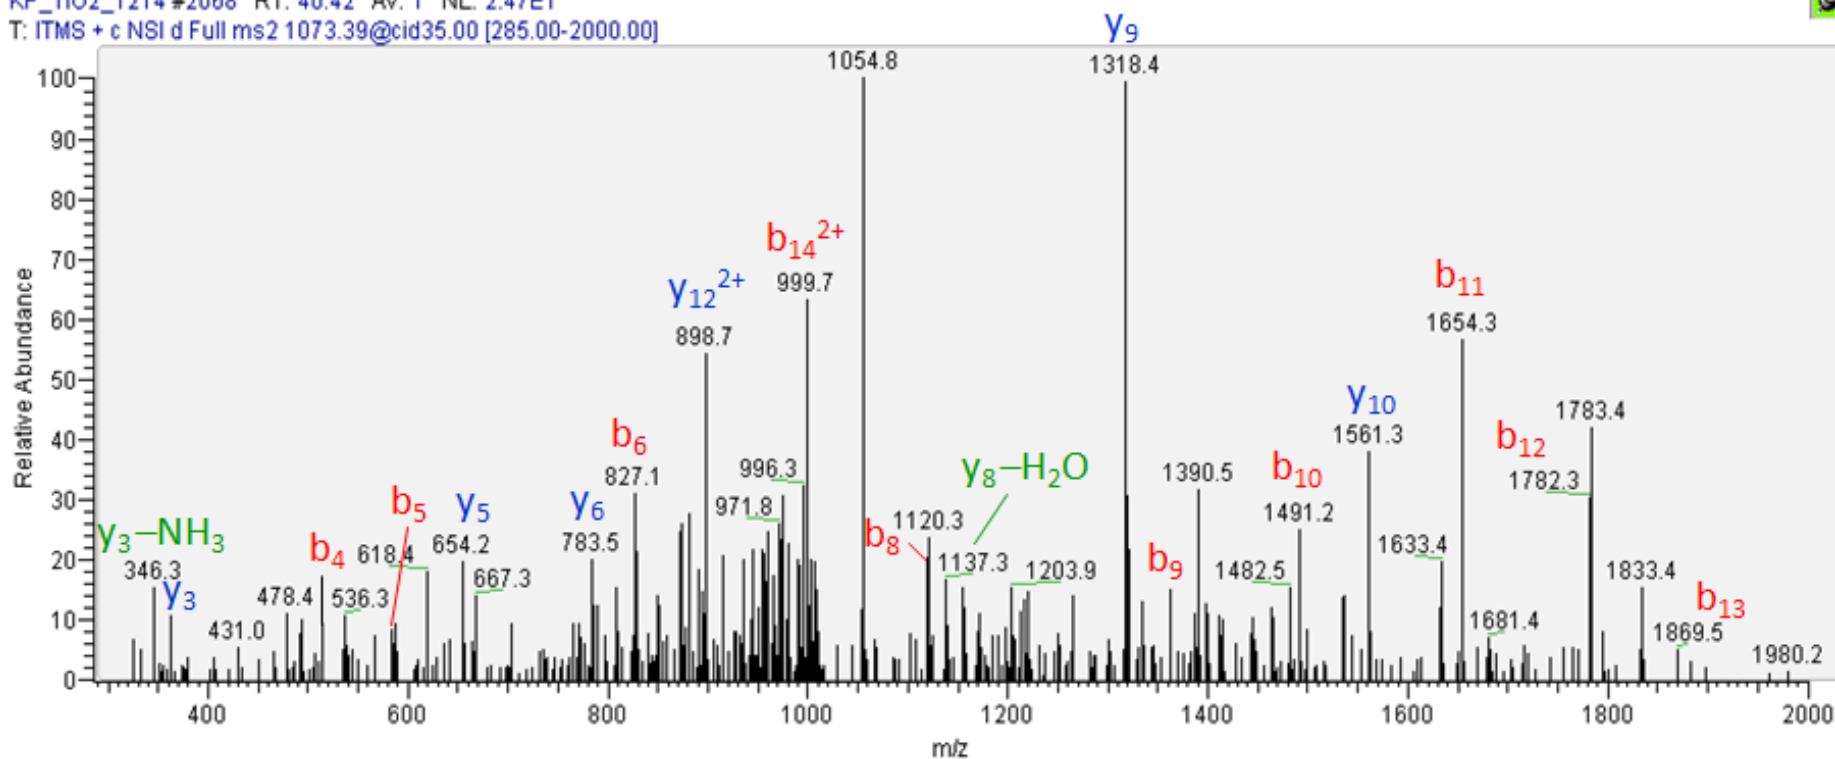

WZC

YGEYAYpYEYEpYKSKE

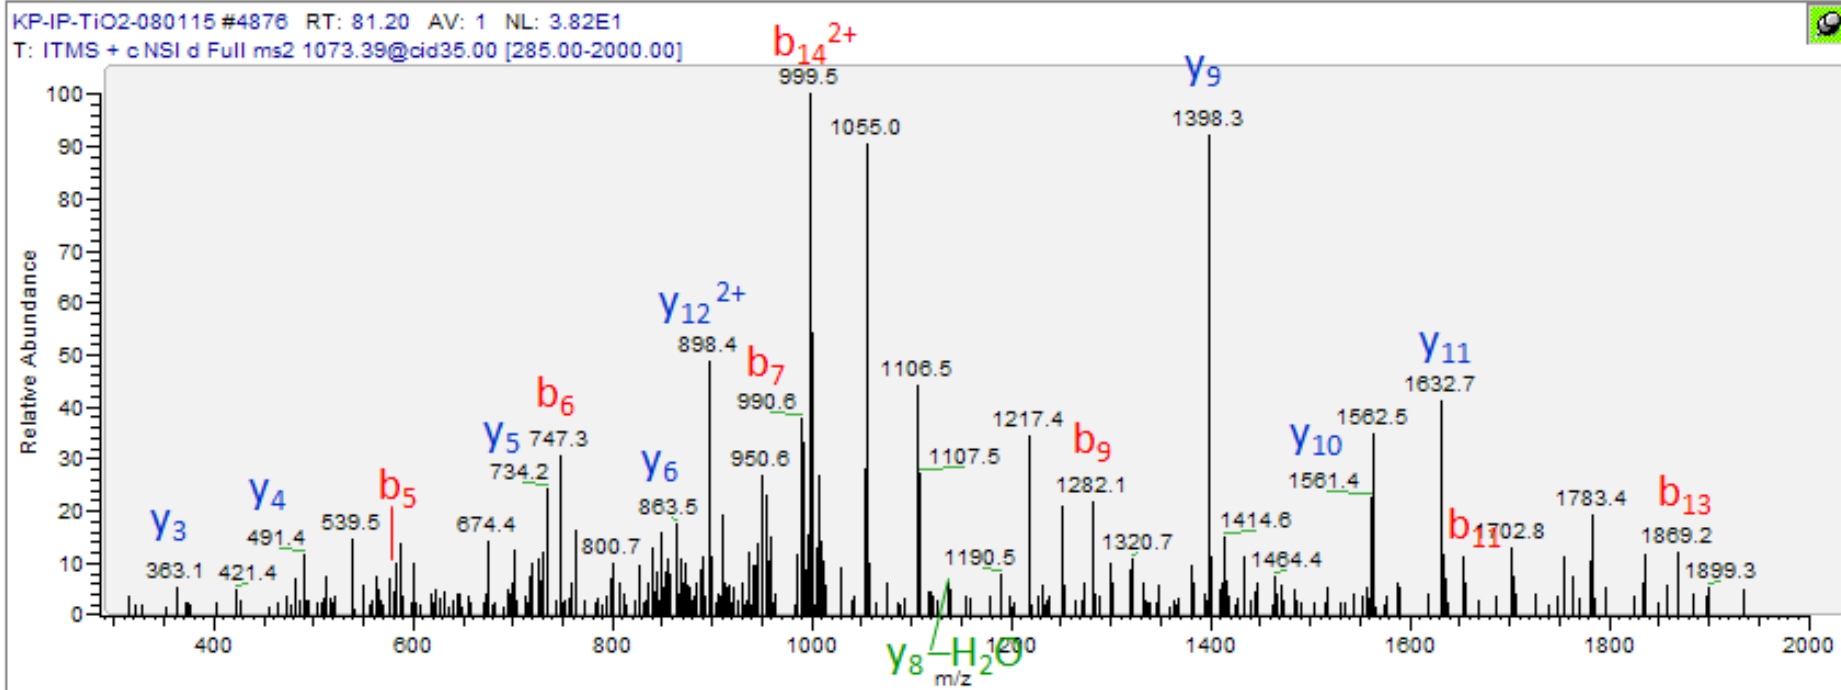

WZC

p[YG<sup>EY</sup>]A<sup>YYE</sup>p<sup>YE</sup>p<sup>Y</sup>K<sup>SKE</sup>

KP-IP-TiO2-080115 #4771 RT: 79.87 AV: 1 NL: 7.05E1  
T: ITMS + c NSI d Full ms2 1113.38@cid35.00 [295.00-2000.00]

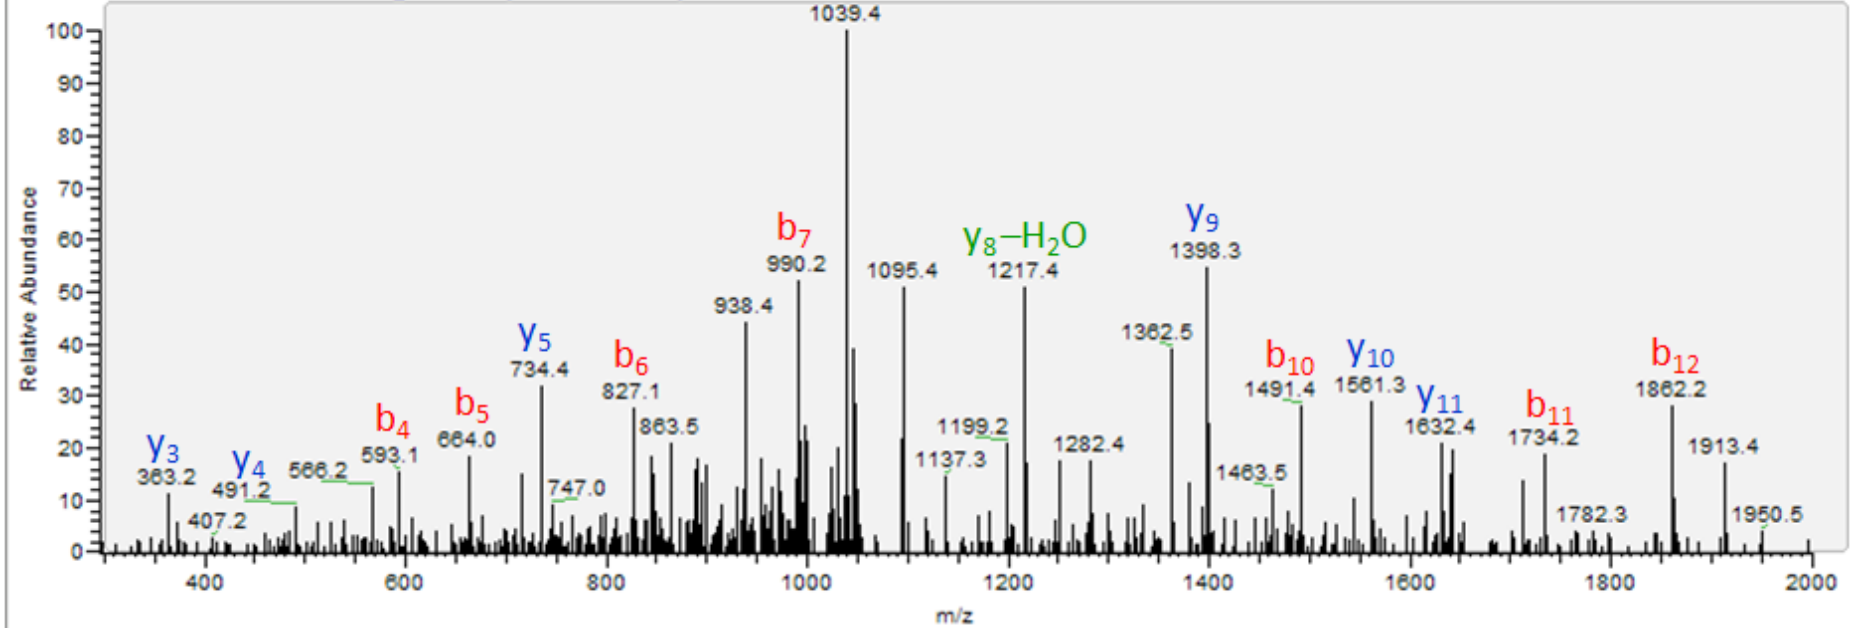

WZC

YGEYApYpYEpYKSKE

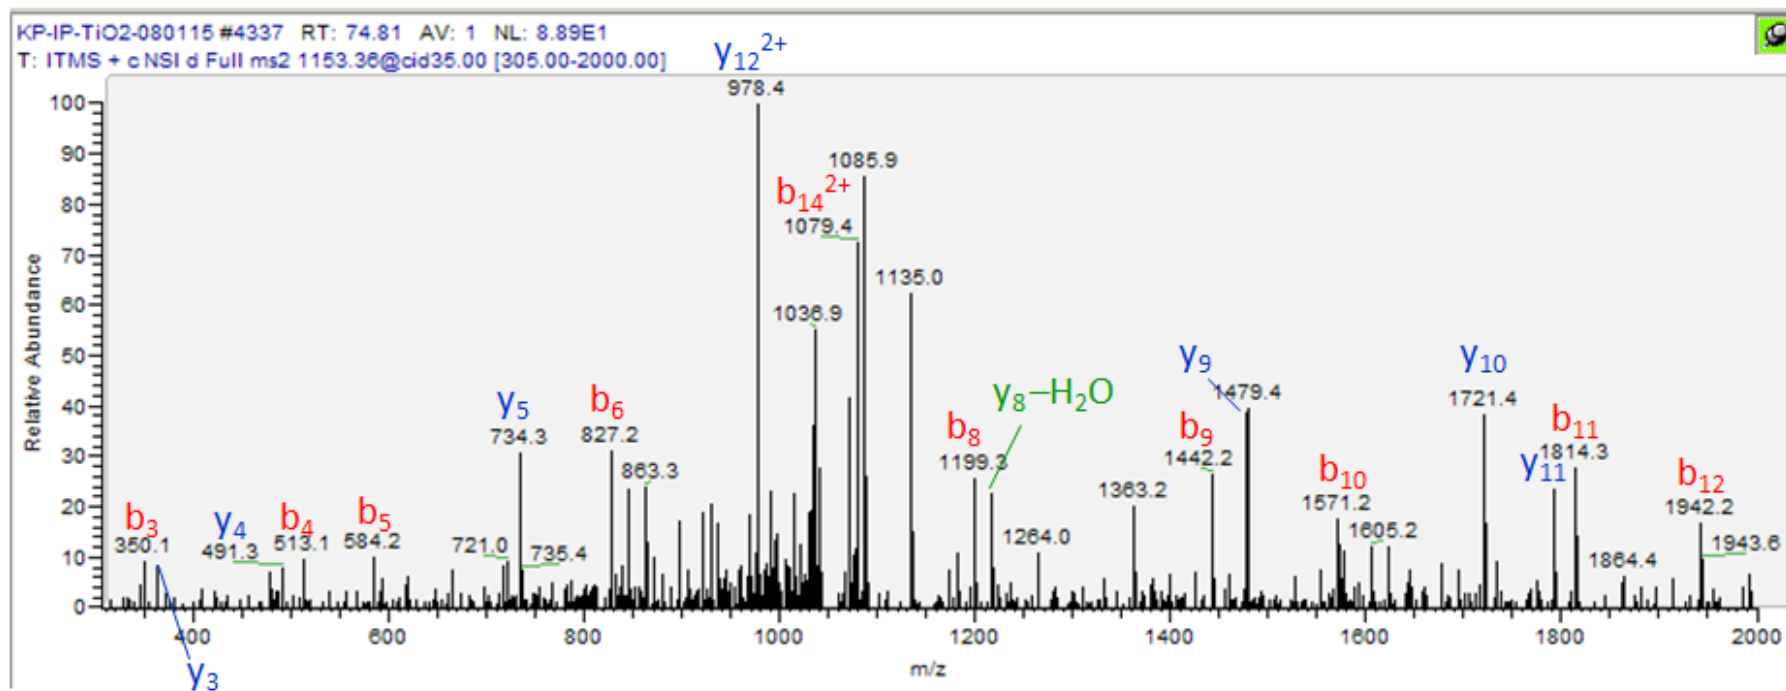



WZC

pYGEYApYYEpYEpYKSKE

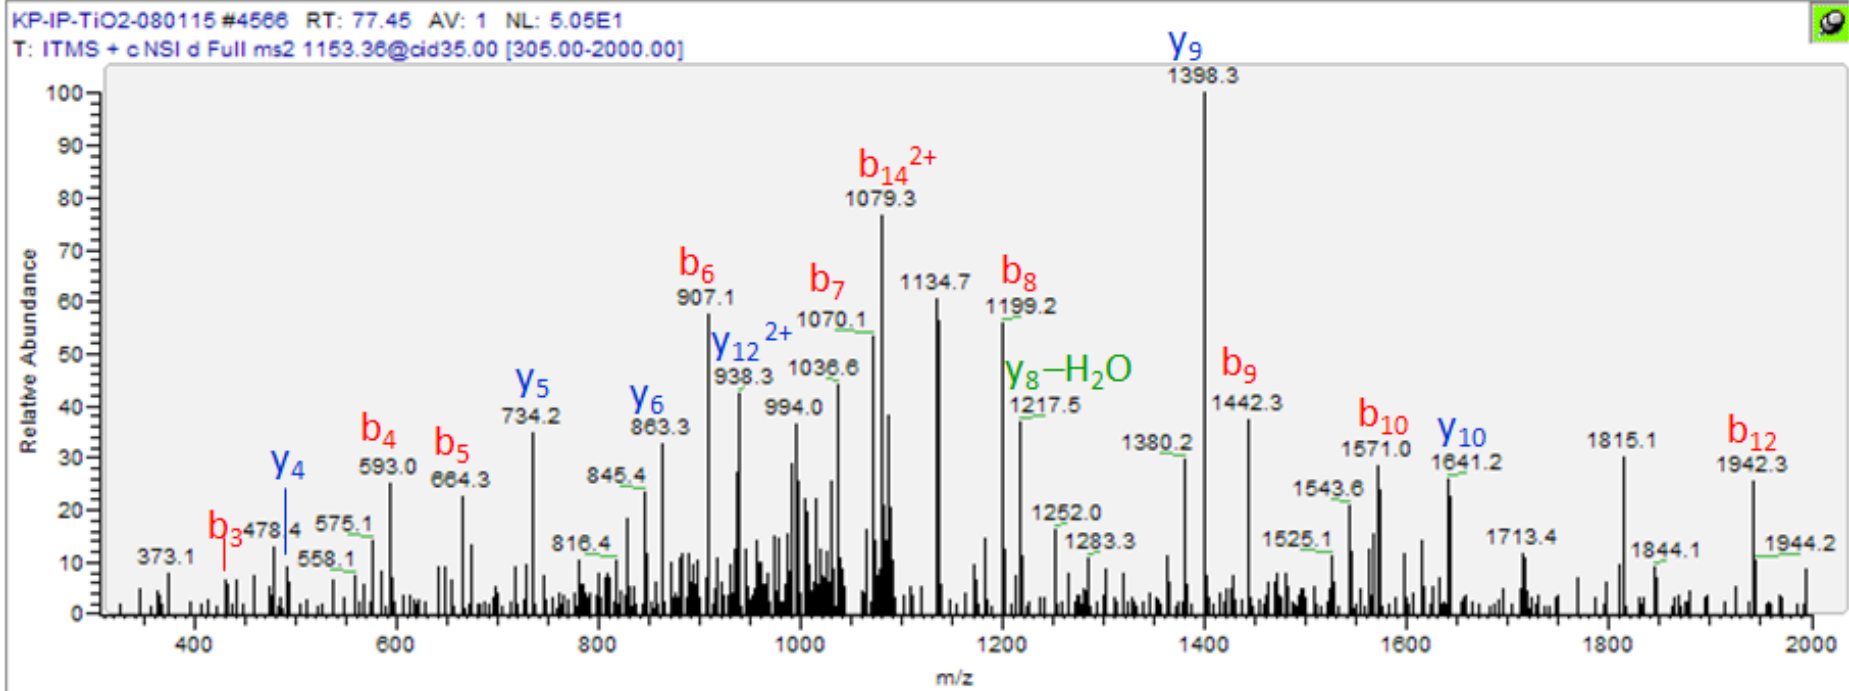

ybbN  
pSQHCEQLTPVLER

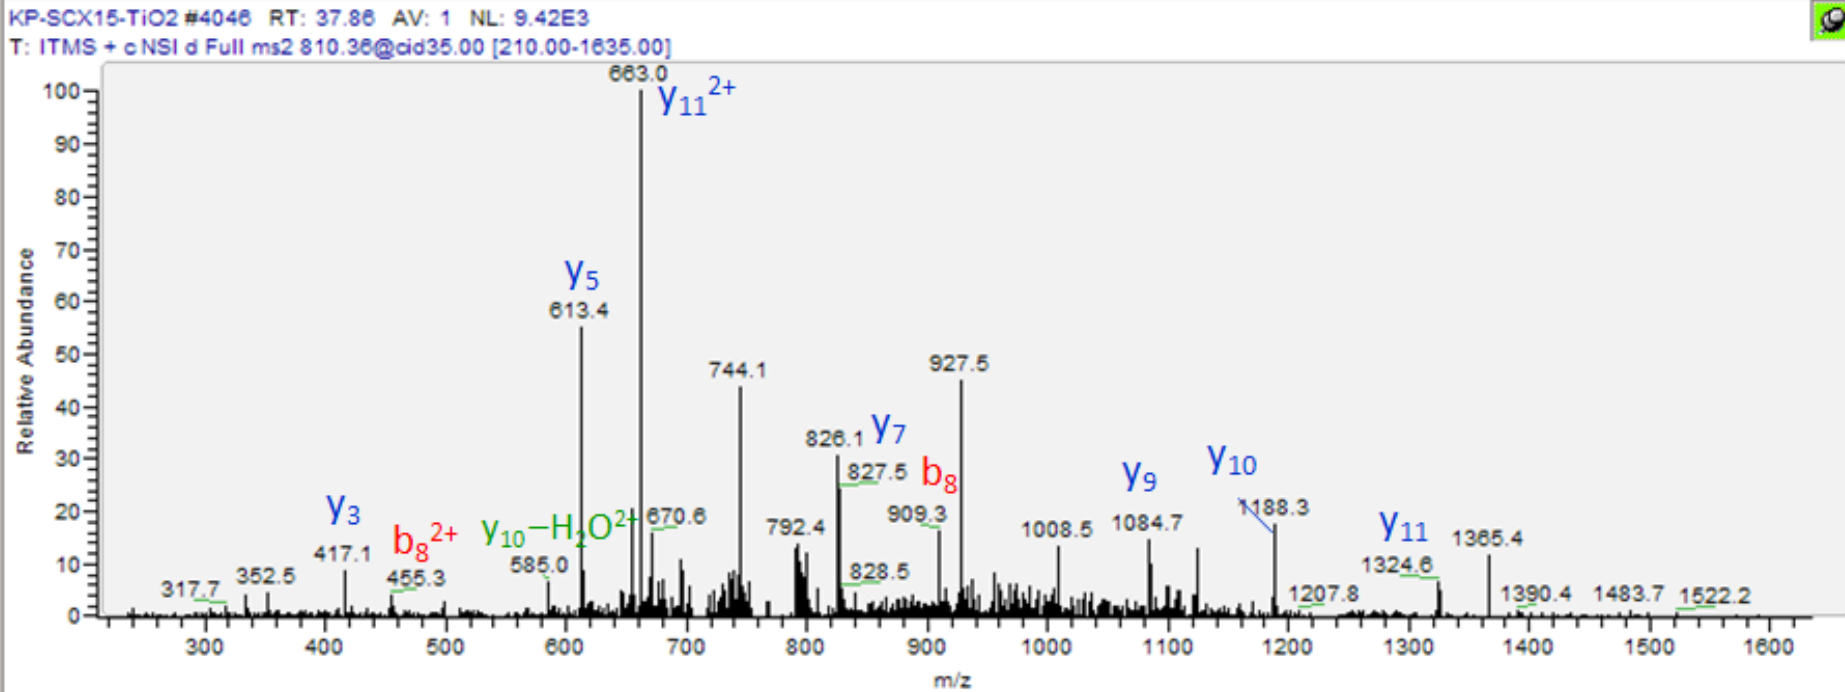

yceF

FPNp[HLIIGSD]QVCVLDGEITGKPHTEENAR

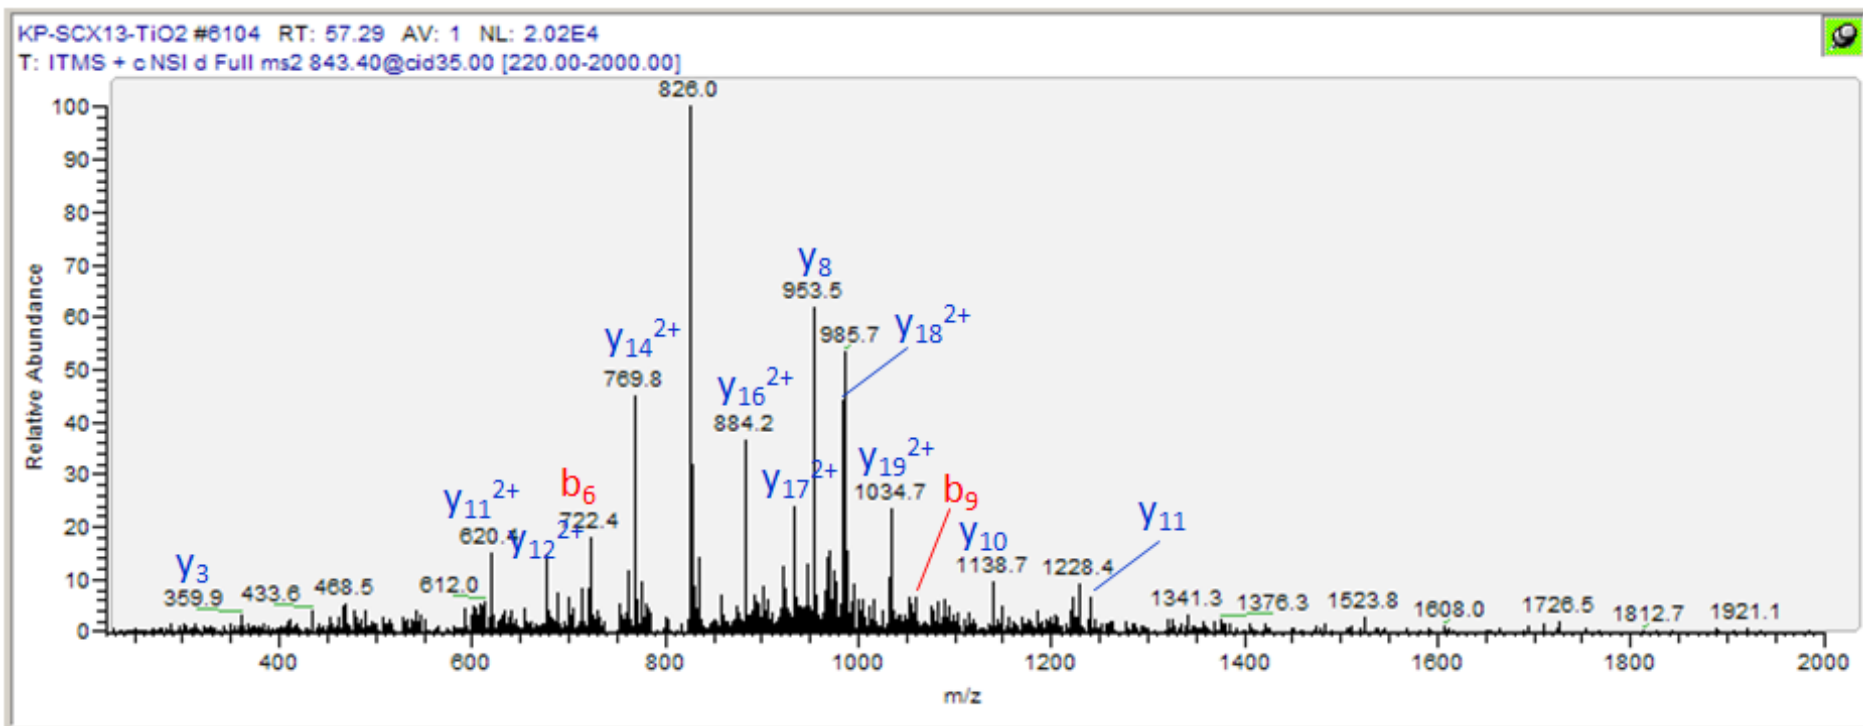

ygaG

p[DH]LNGNGVEIIDISPMGCR

<P-SCX12-TiO2 #5343 RT: 49.89 AV: 1 NL: 2.99E3  
Γ: ITMS + c NSI d Full ms2 1068.97@cid35.00 [280.00-2000.00]

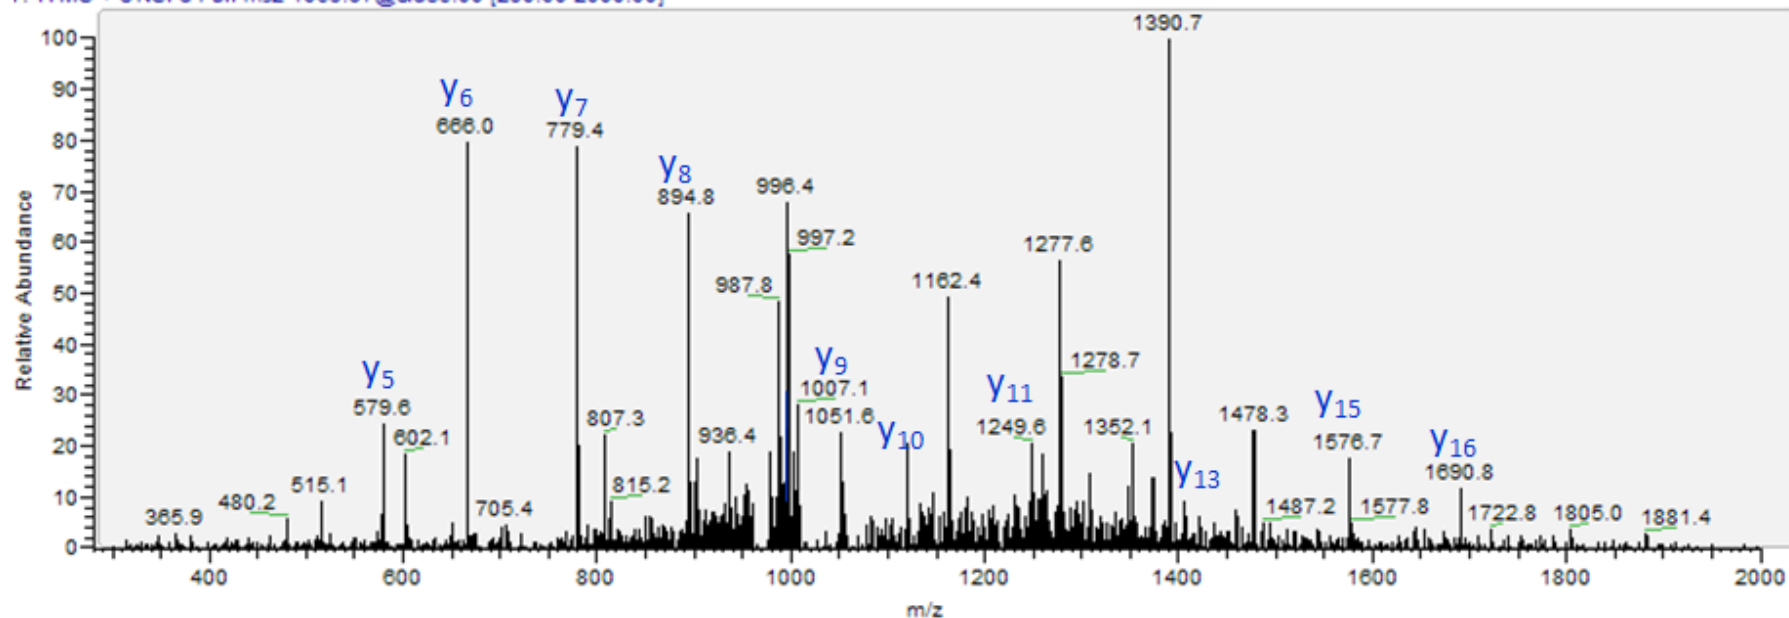

# yhaH

FGPDPKPFSpY

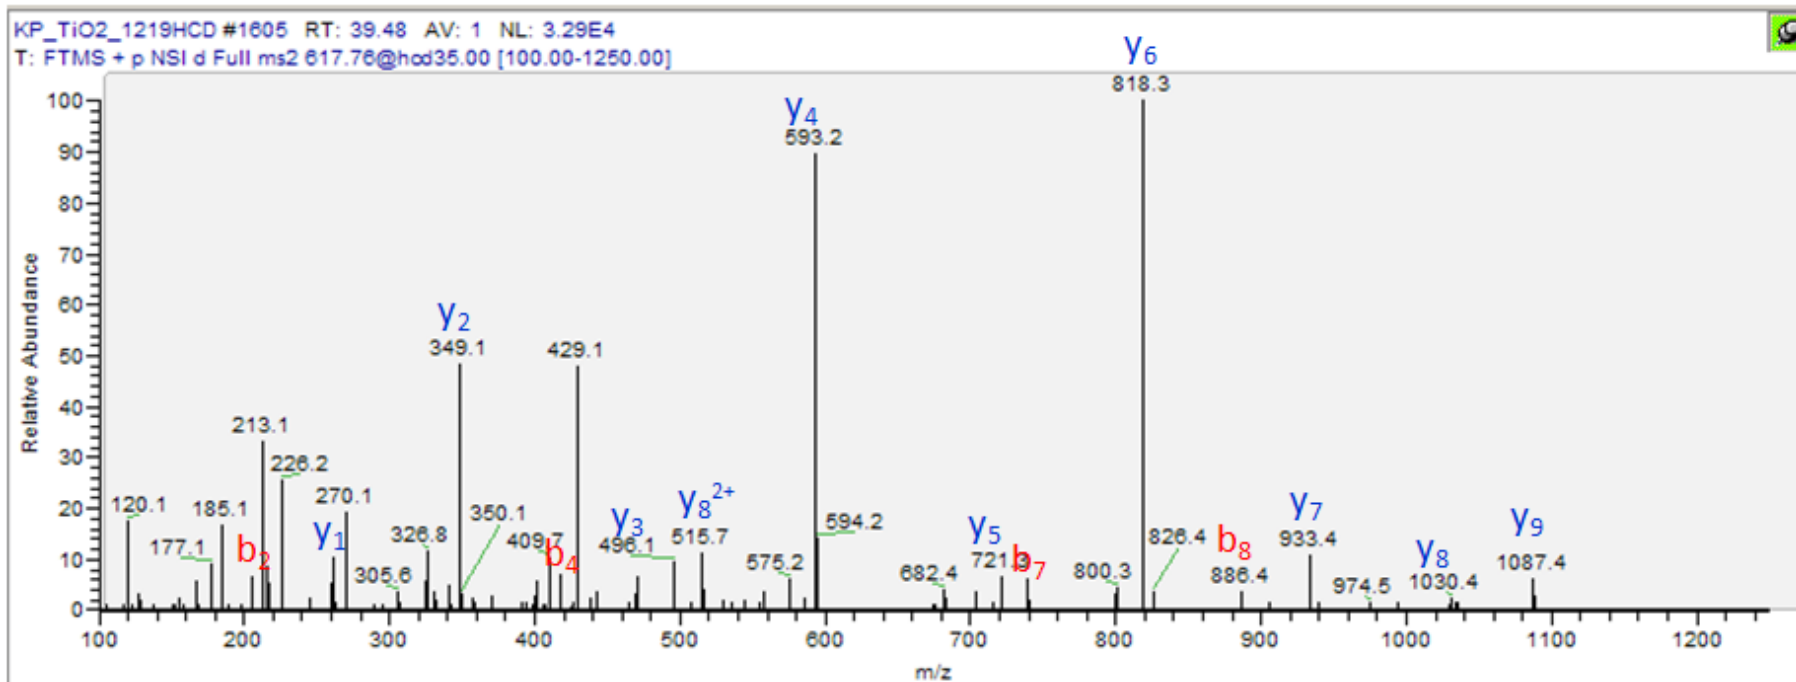

BAH60946

KPIPLGVpSESSVPAPK

KP\_TIO2\_1214#1950 RT: 38.71 AV: 1 NL: 4.24E1  
T: ITMS + cNSI d Full ms2 843.95@cid35.00 [220.00-1700.00]

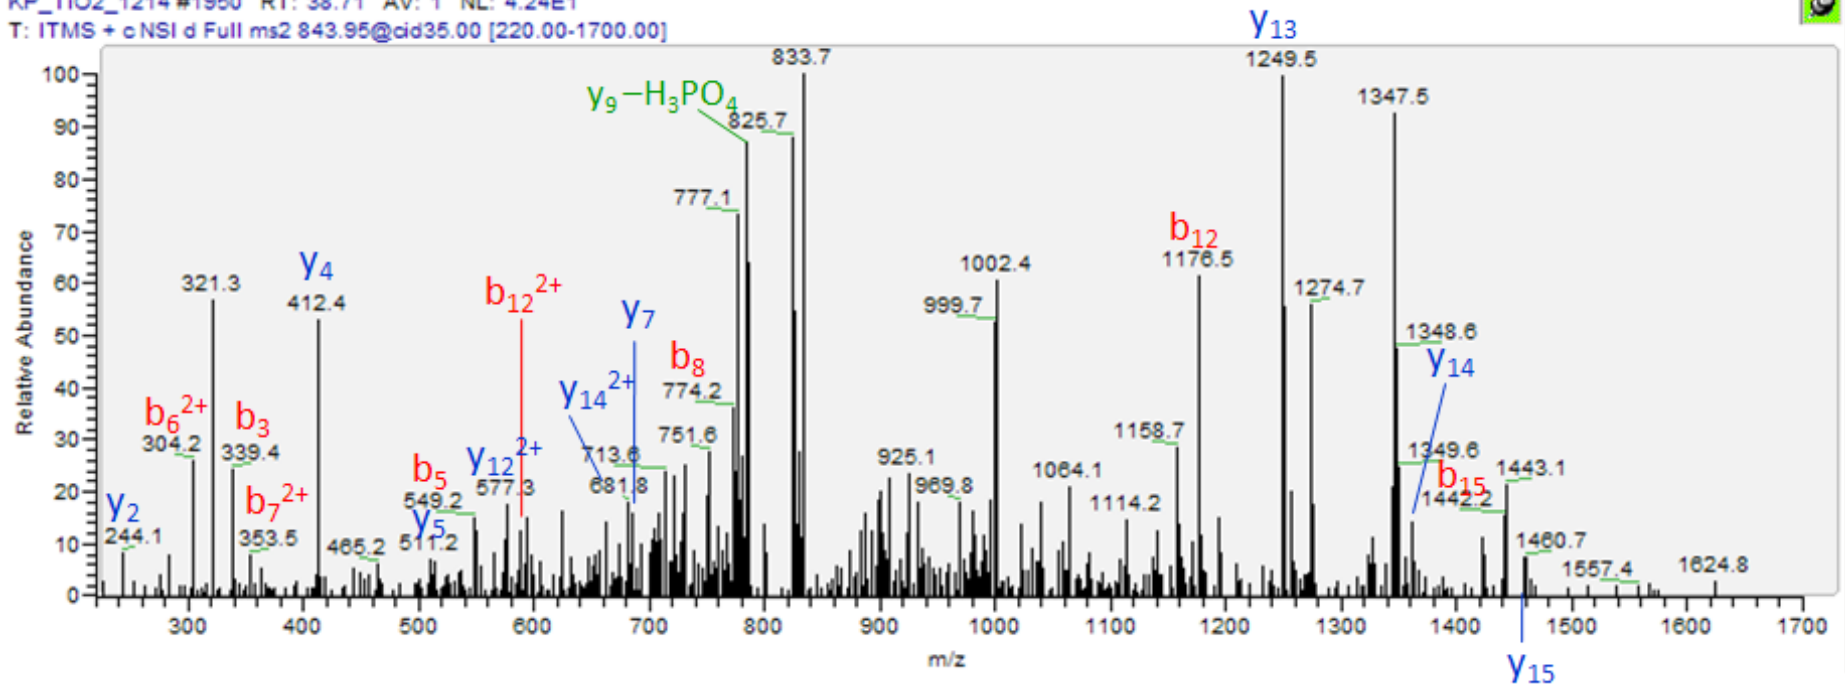

BAH61513

FNALpYEAIHVQGAK

KP\_TiO2\_1214 #2655 RT: 48.60 AV: 1 NL: 3.06E1  
T: ITMS + c NSI d Full ms2 820.90@cid35.00 [215.00-1655.00]

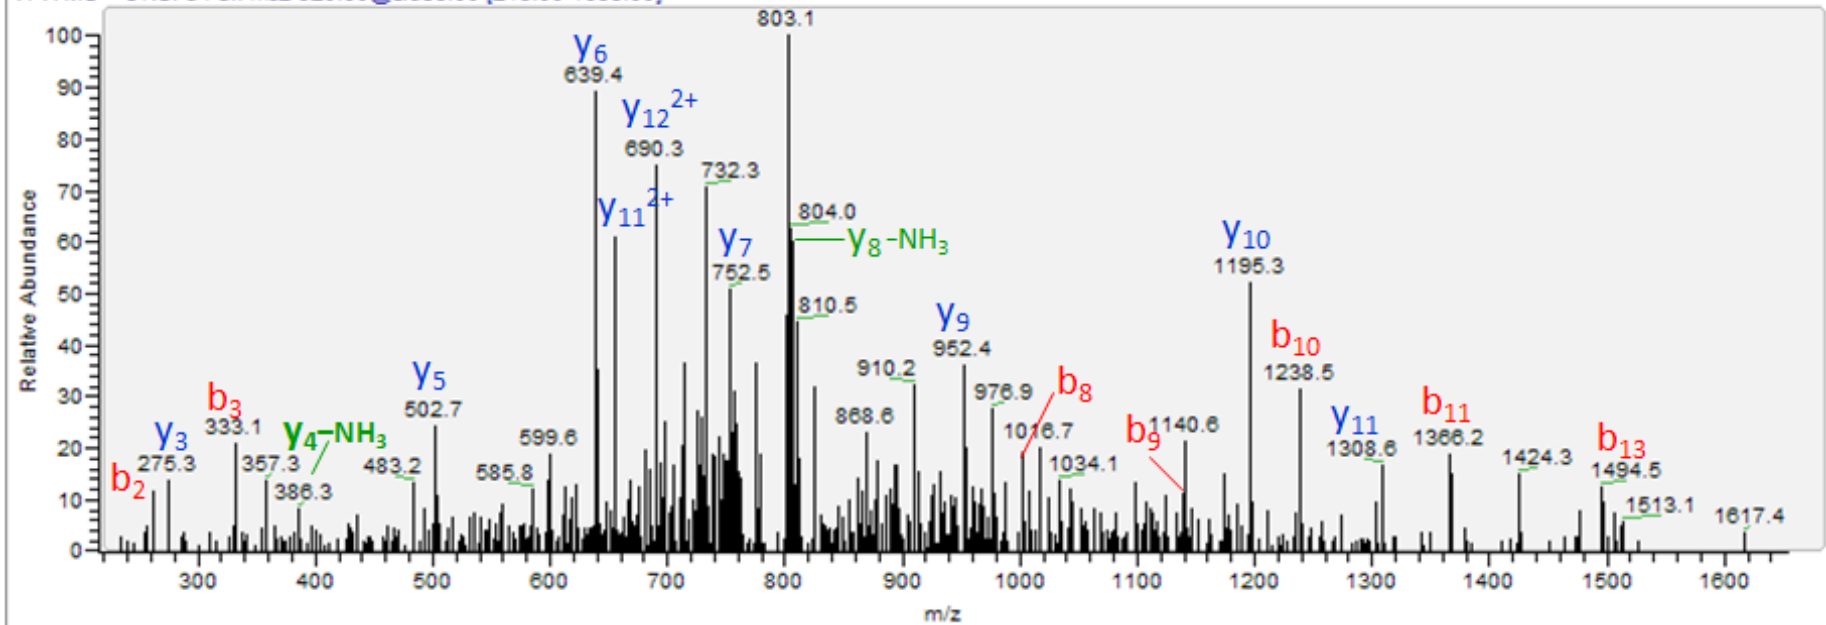

BAH61513  
SSNNpYLGAAR

KP-TiO2 #3141 RT: 52.61 AV: 1 NL: 1.41E3

T: ITMS + c NSI d Full ms2 566.74@cid35.00 [145.00-1145.00]

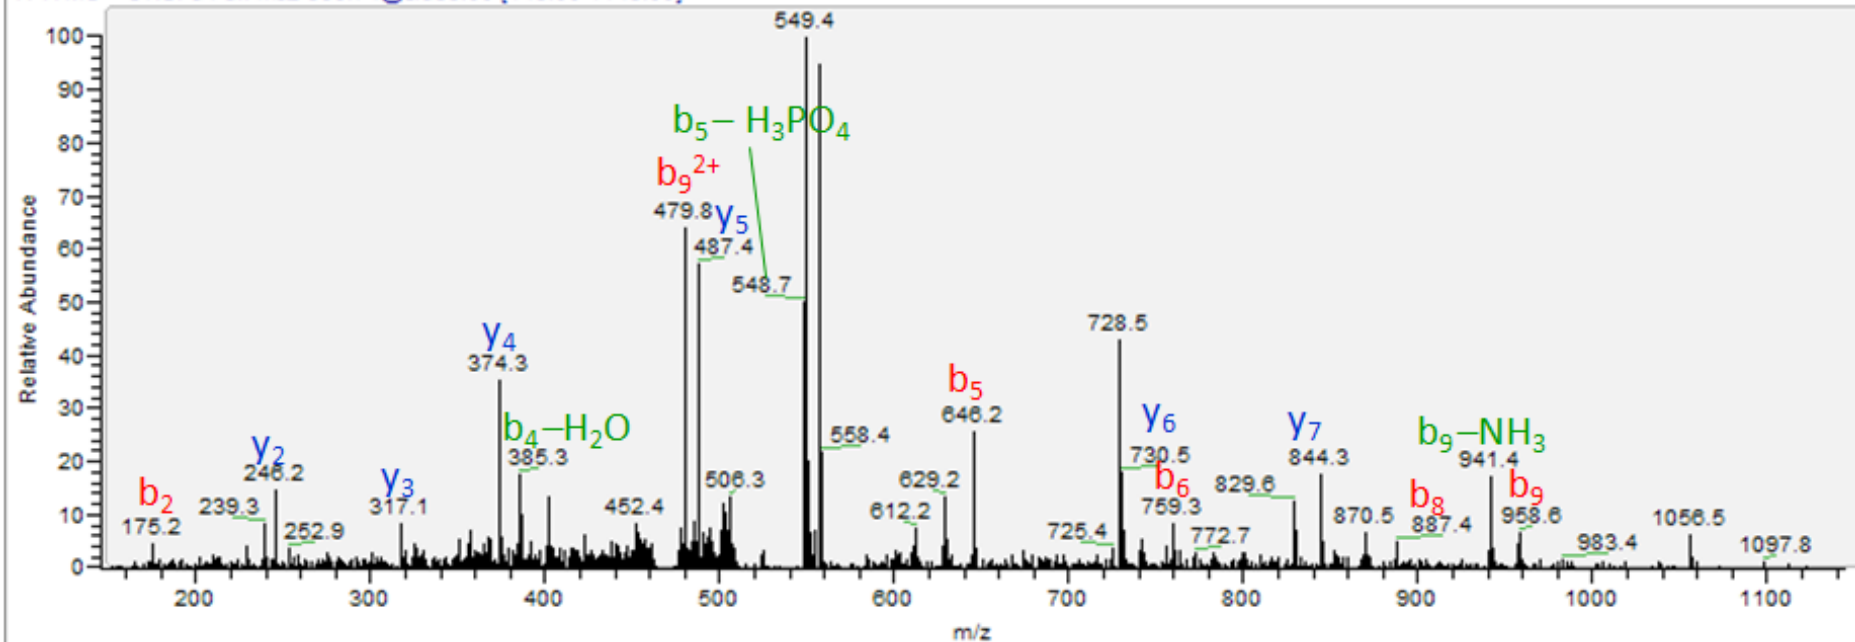



BAH61570

pHASIVPHCAETFAHLVR

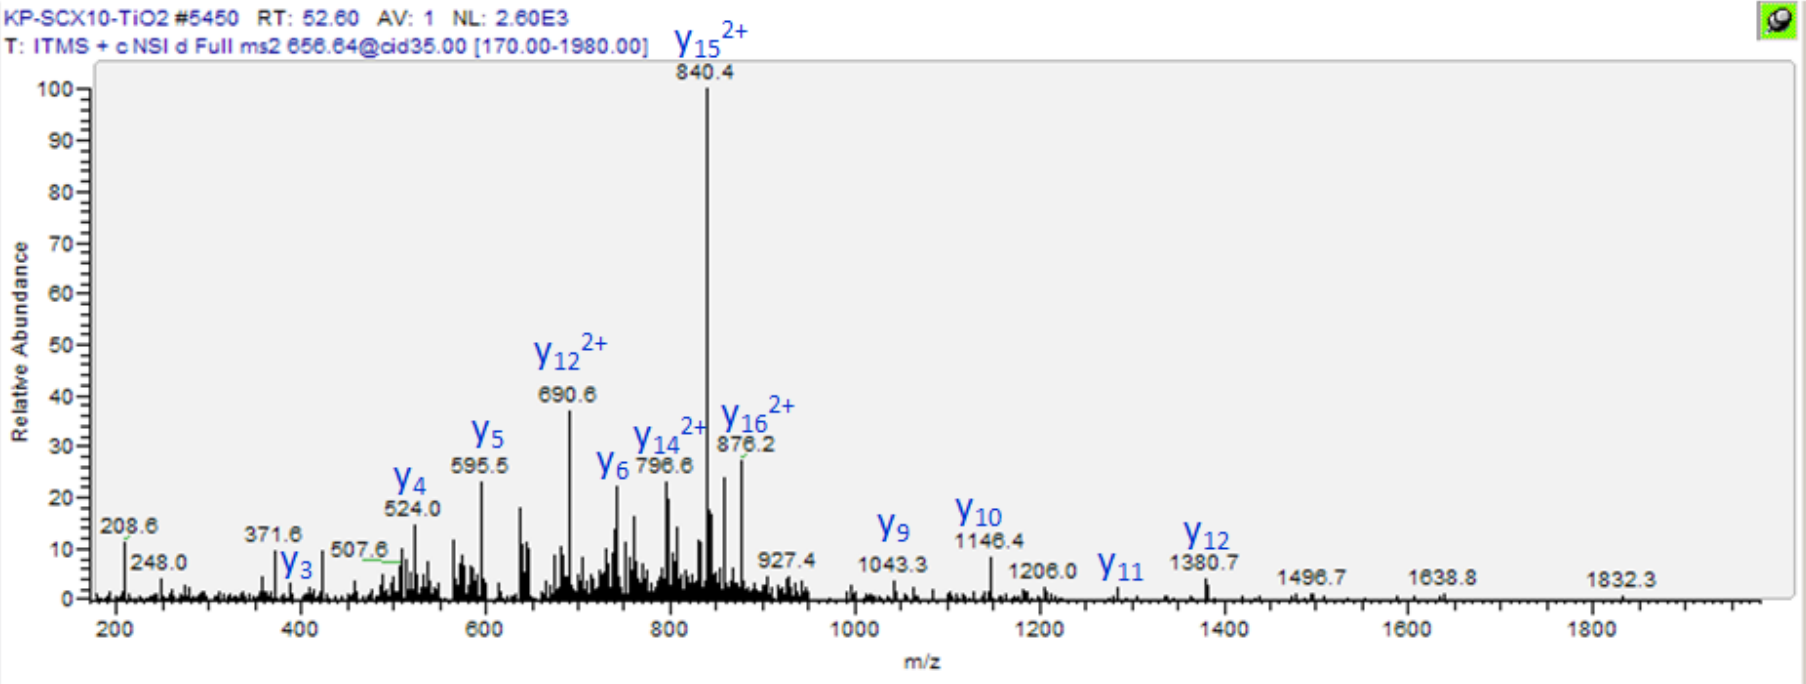

BAH61638

ALpTICTVSDHIR

KP-SCX1-TiO2 #4951 RT: 52.42 AV: 1 NL: 1.10E3

T: ITMS + e NSI d Full ms2 704.84@cid35.00 [180.00-1420.00]

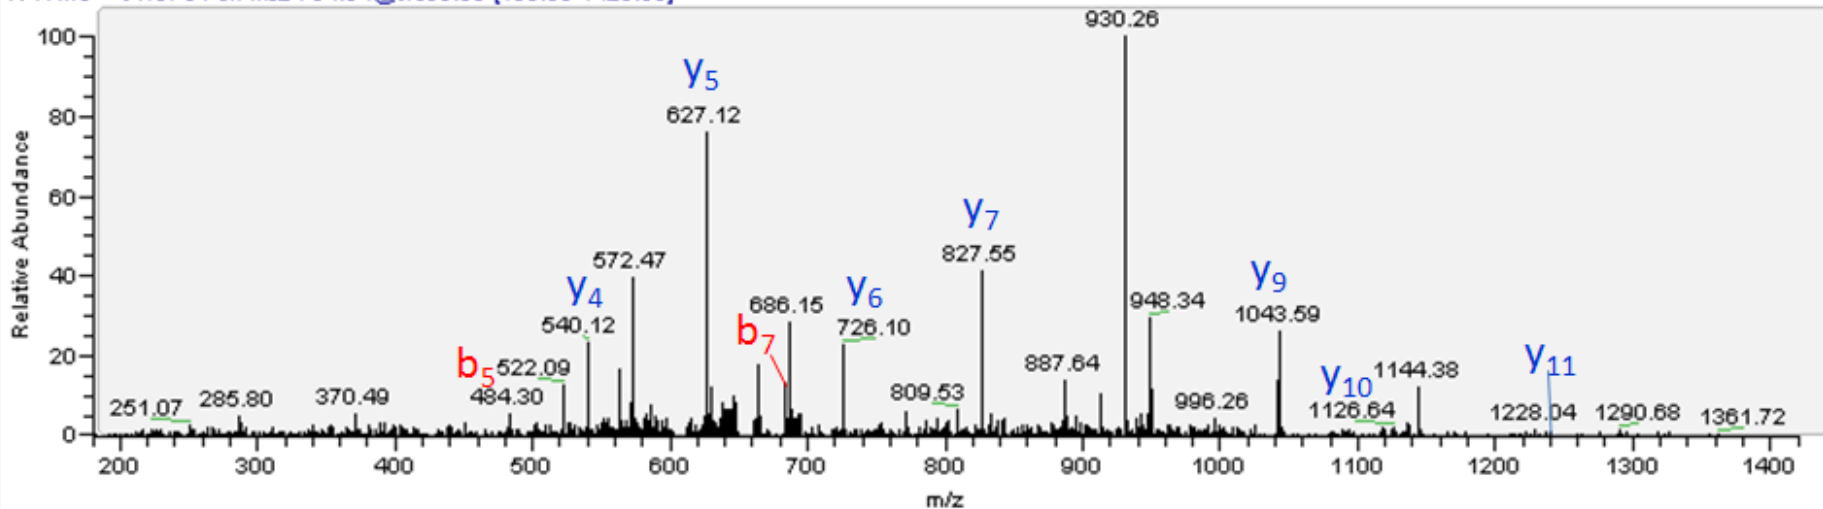

BAH61673

ISpSTAVR

KP-IP-TiO2-080115 #3021 RT: 60.13 AV: 1 NL: 8.09E1  
T: ITMS + c NSI d Full ms2 407.20@cid35.00 [100.00-825.00]

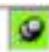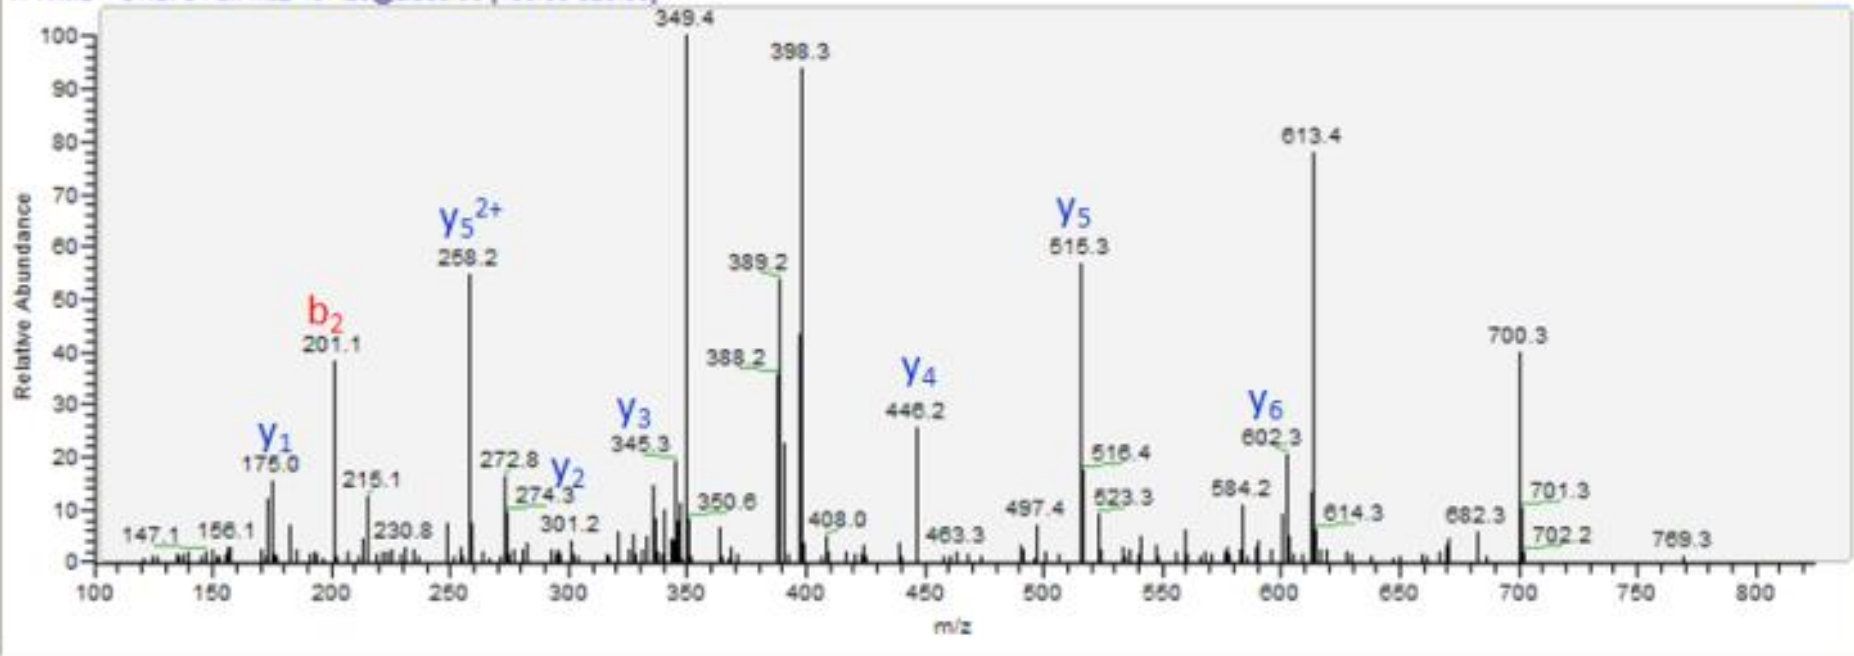

BAH62414

AAHDFpY

KP-IP-TiO2-080115 #3572 RT: 66.21 AV: 1 NL: 5.02E2  
T: ITMS + cNSI d Full ms2 402.14@cid35.00 [100.00-815.00]

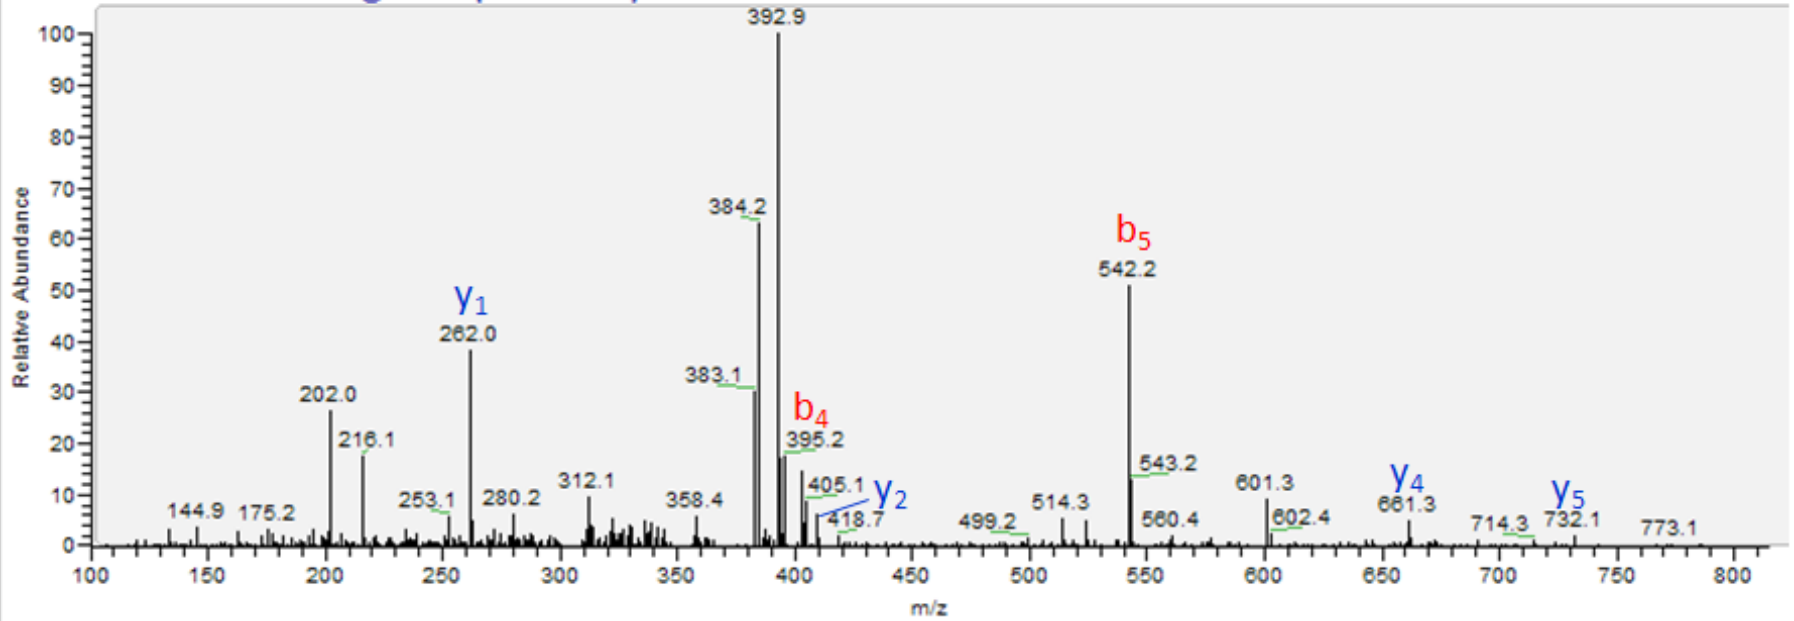

BAH62914

LLNNpSELTHAPCAPGTLETLAR

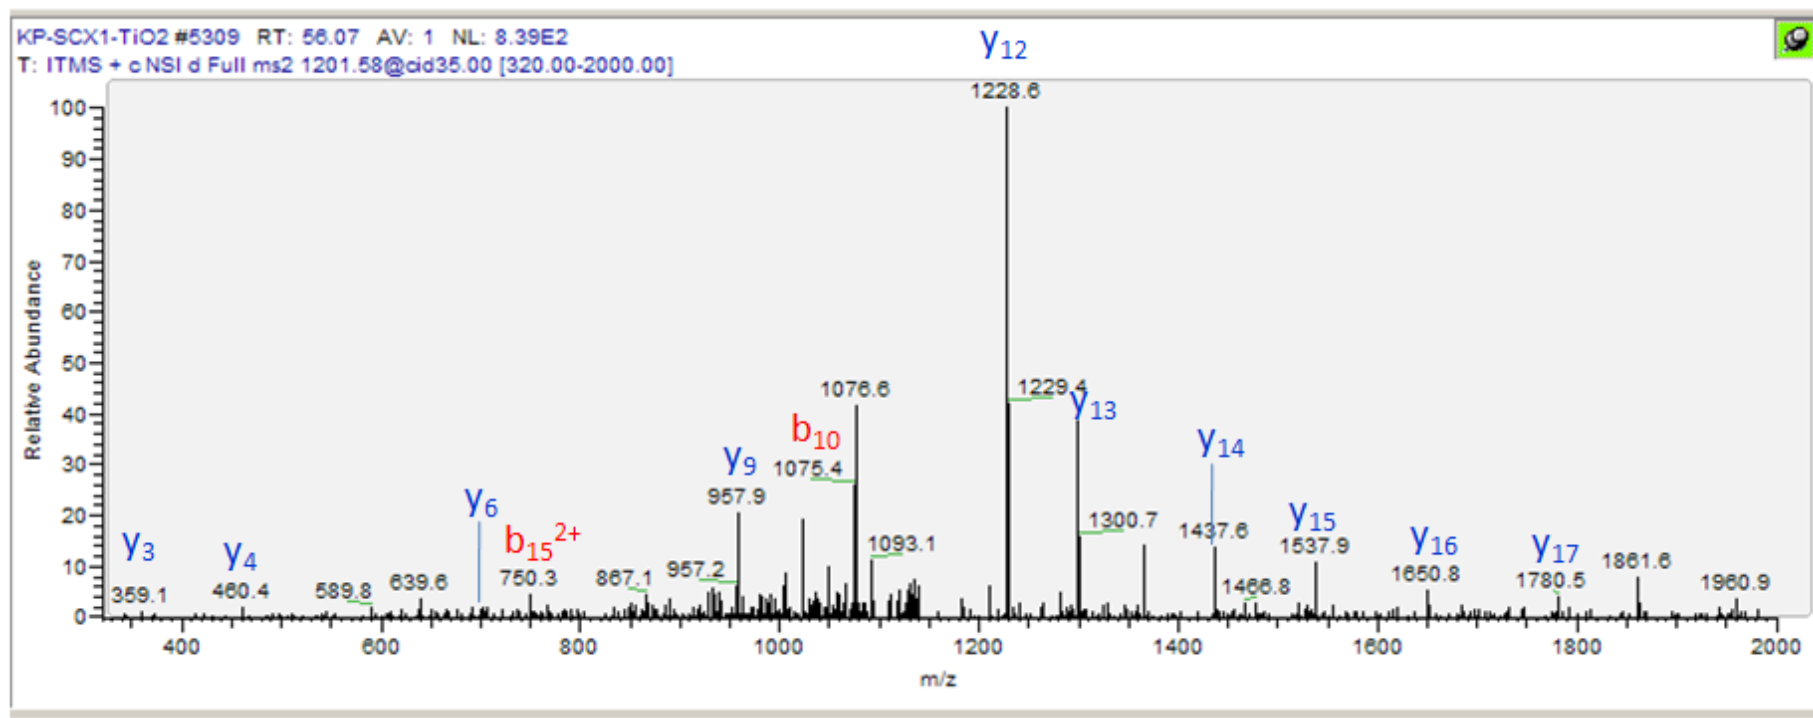

BAH62914

GpYLIPK

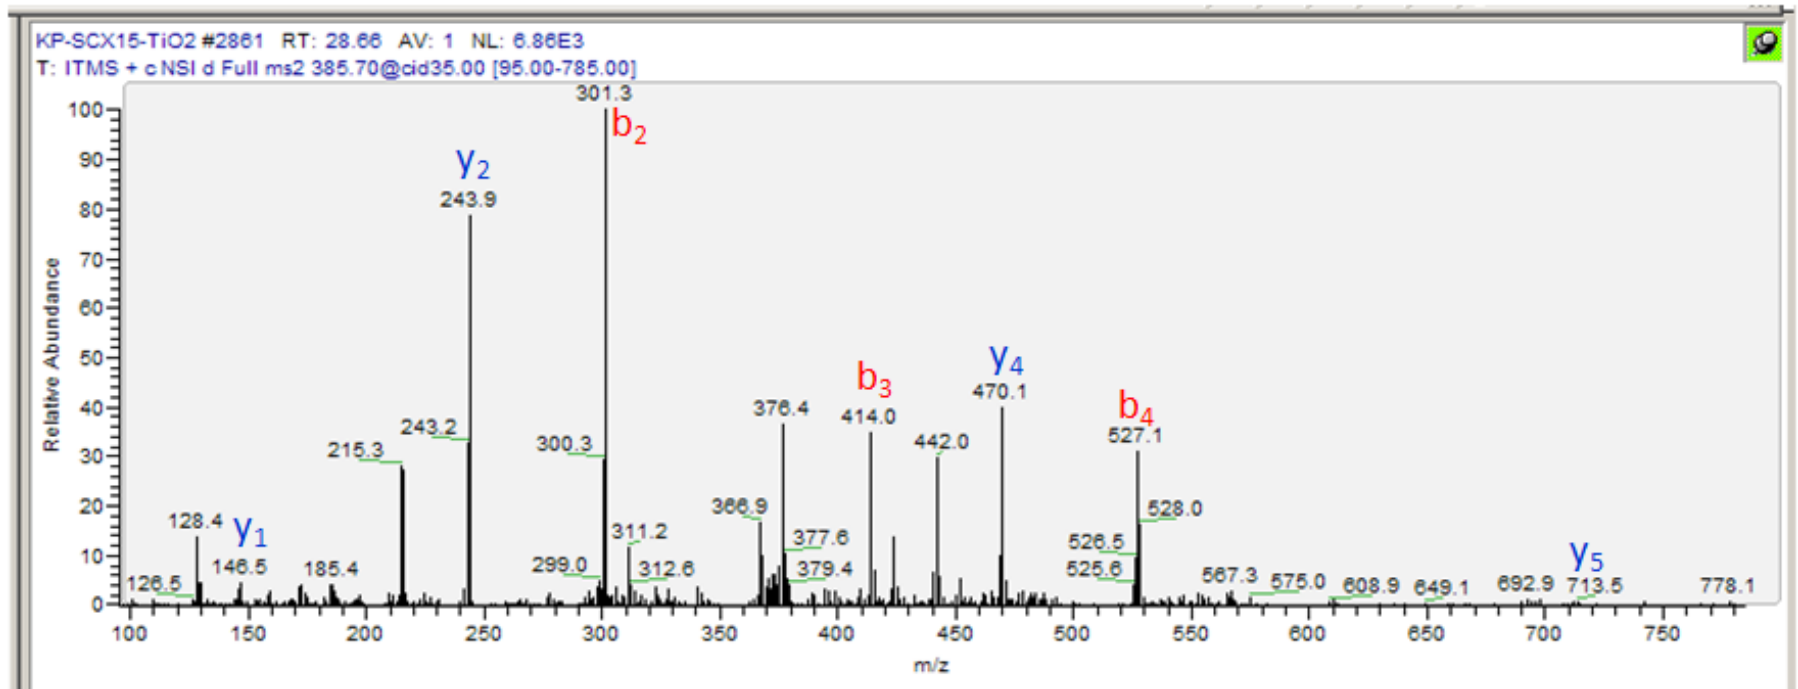

BAH62914

pSPVNDHPLCLFNPQEDAQILQK

KP-SCX4-TIO2 #7239 RT: 68.10 AV: 1 NL: 1.49E3  
T: ITMS + cNSI d Full ms2 1294.60@cid35.00 [345.00-2000.00]

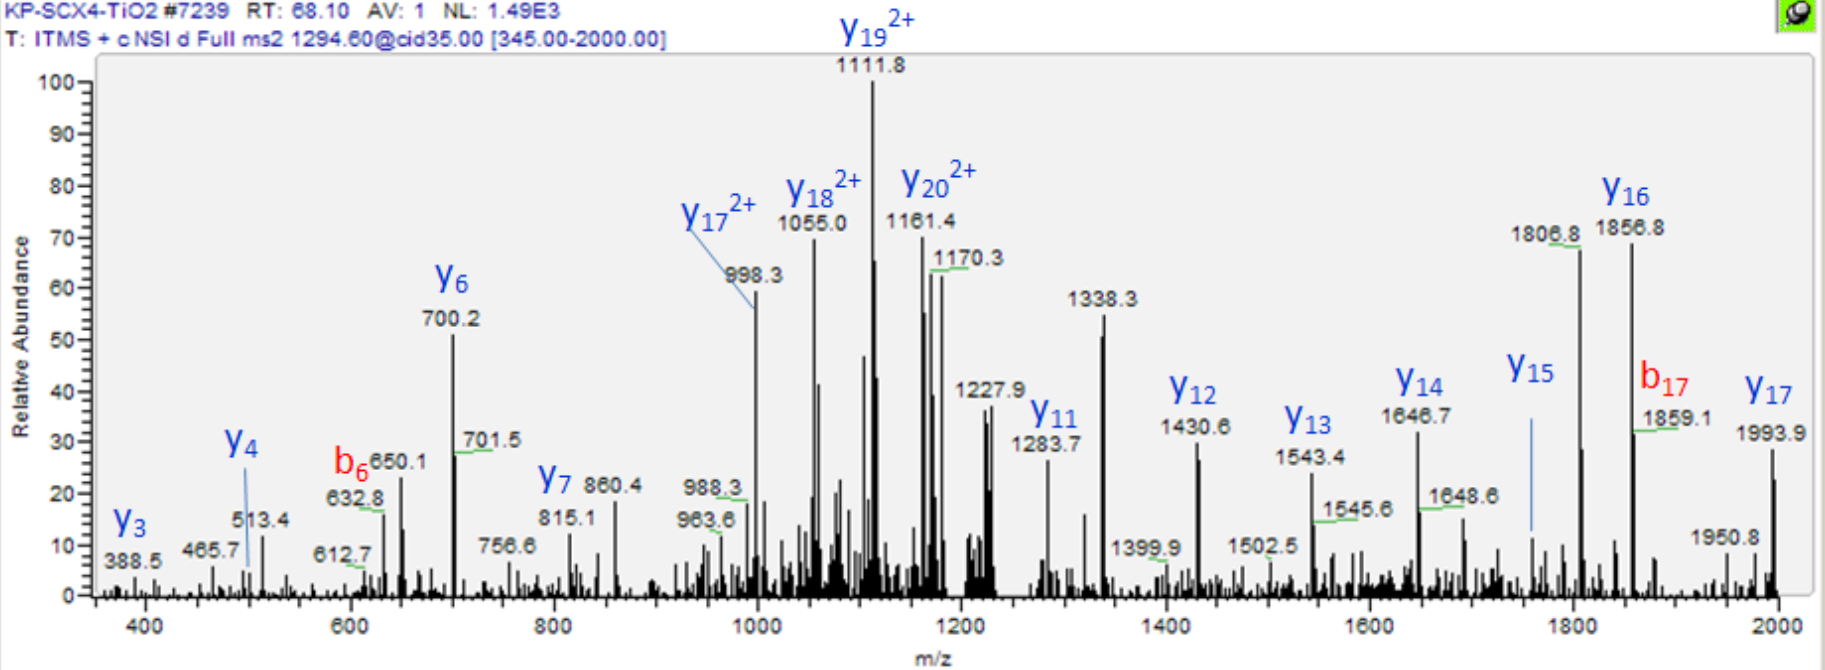

BAH64534

VCVpSPGIGFGDYGDTHVR

KP-SCX2-TIO2 #5156 RT: 53.27 AV: 1 NL: 7.32E2

T: ITMS + c NSI d Full ms2 980.42@cid35.00 [255.00-1975.00]

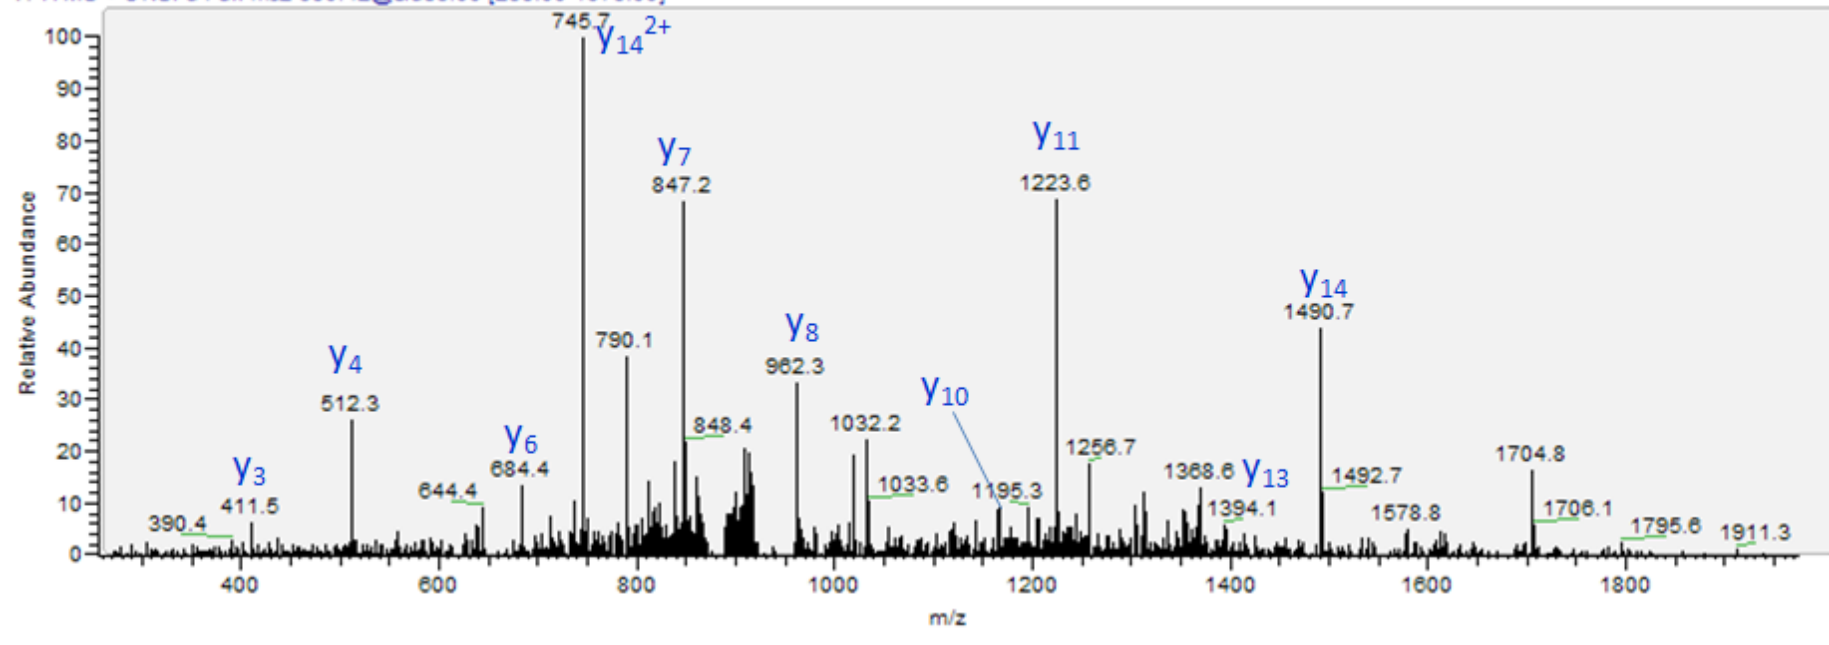



BAH65365

EpTGACNVQVIGK

KP\_TiO2\_1214 #1314 RT: 29.00 AV: 1 NL: 1.80E1  
T: ITMS + c NSI d Full ms2 649.79@cid35.00 [165.00-1310.00]

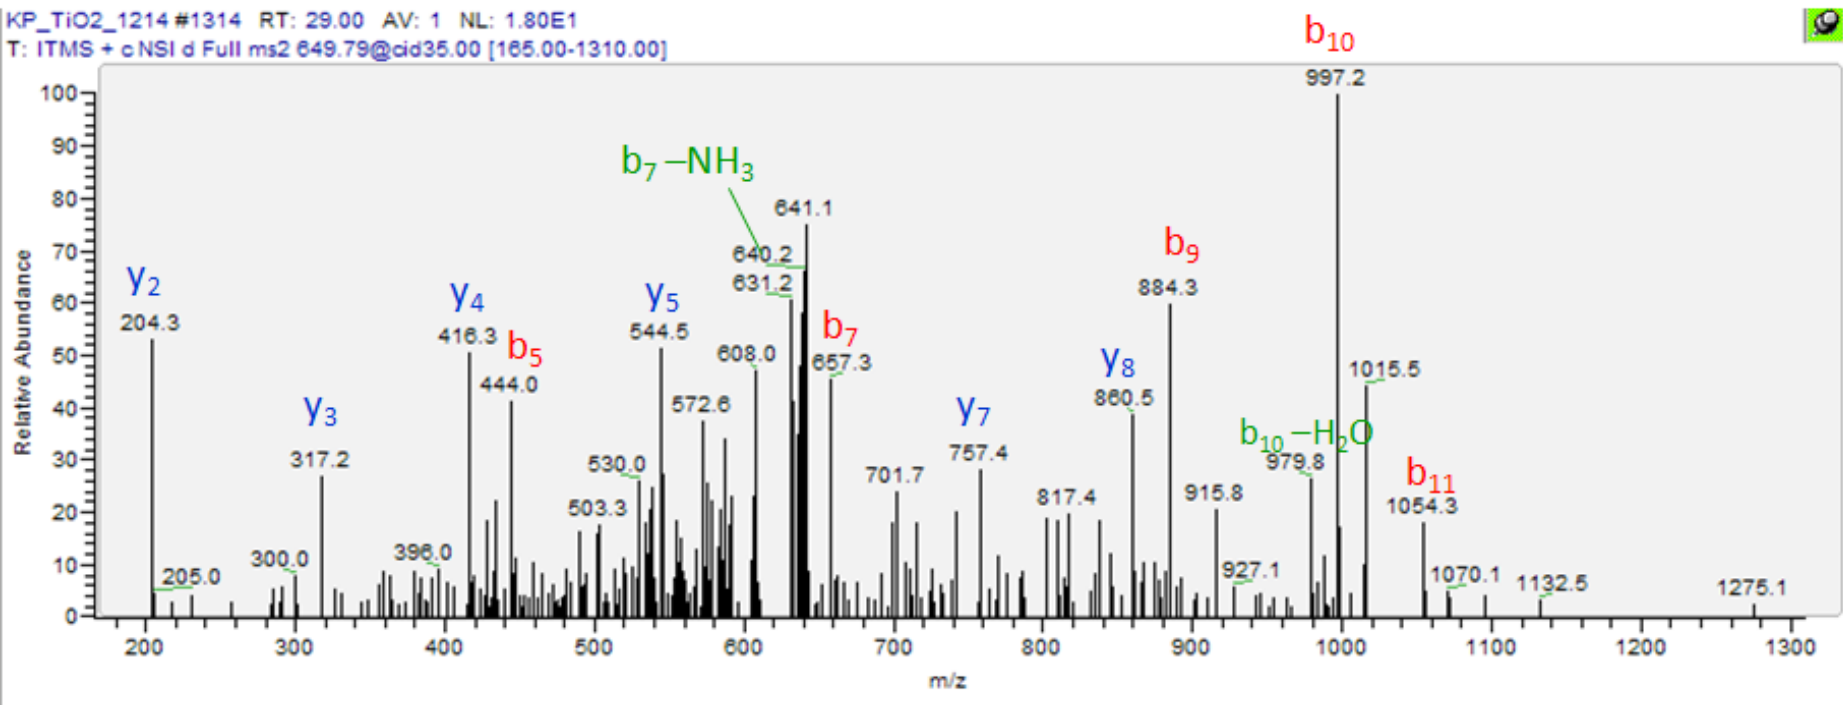

BAH65470

IApY**N**VEAAR

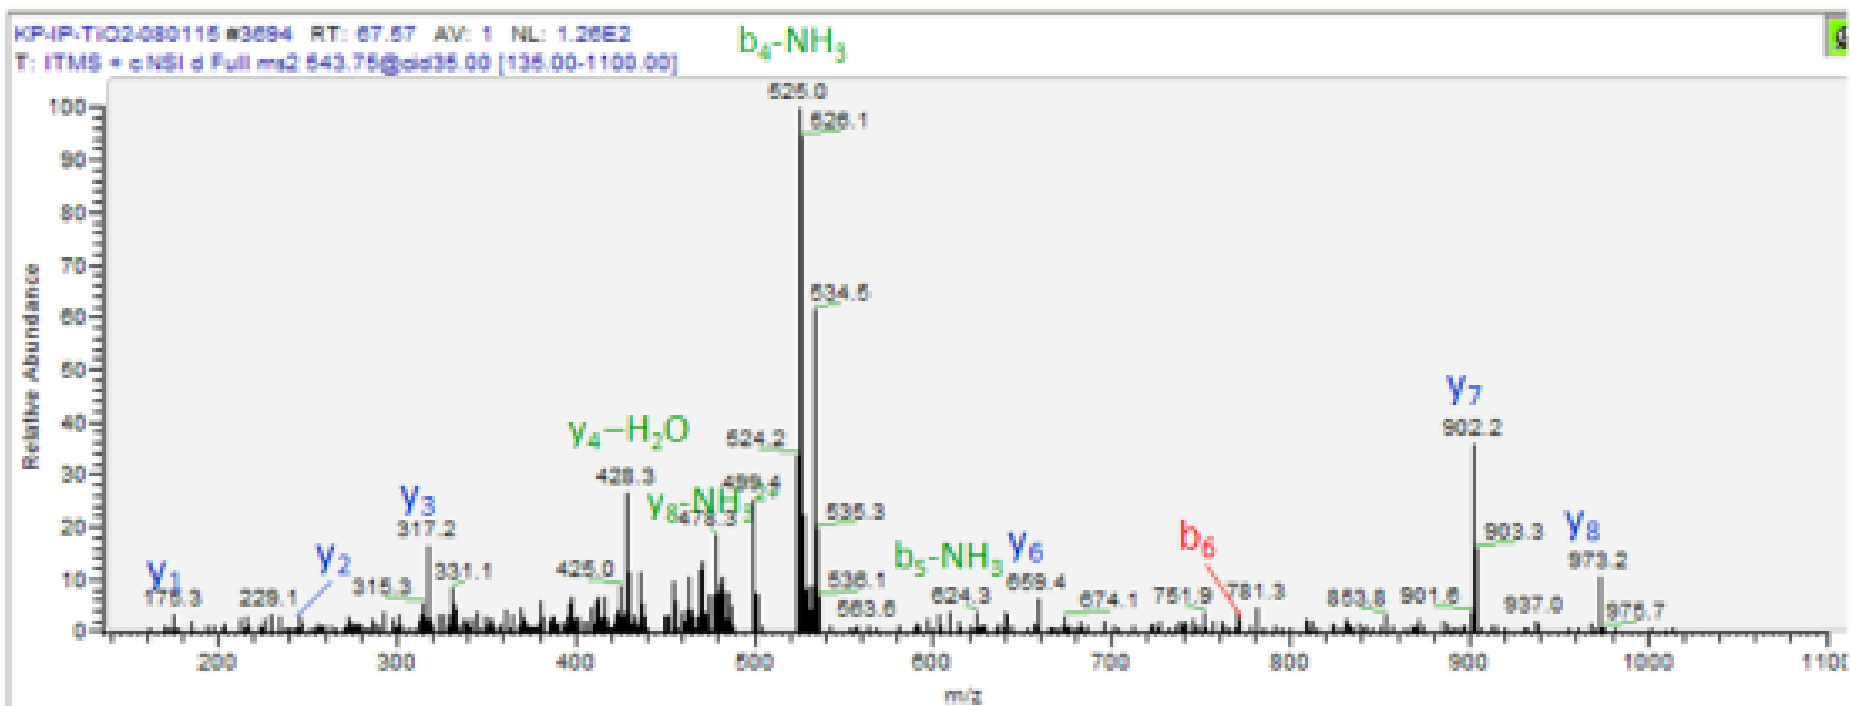

BAH65470

SGIGPVTAADI

[THD]

GDVEIVKPQHVICHLTDENAAISMR

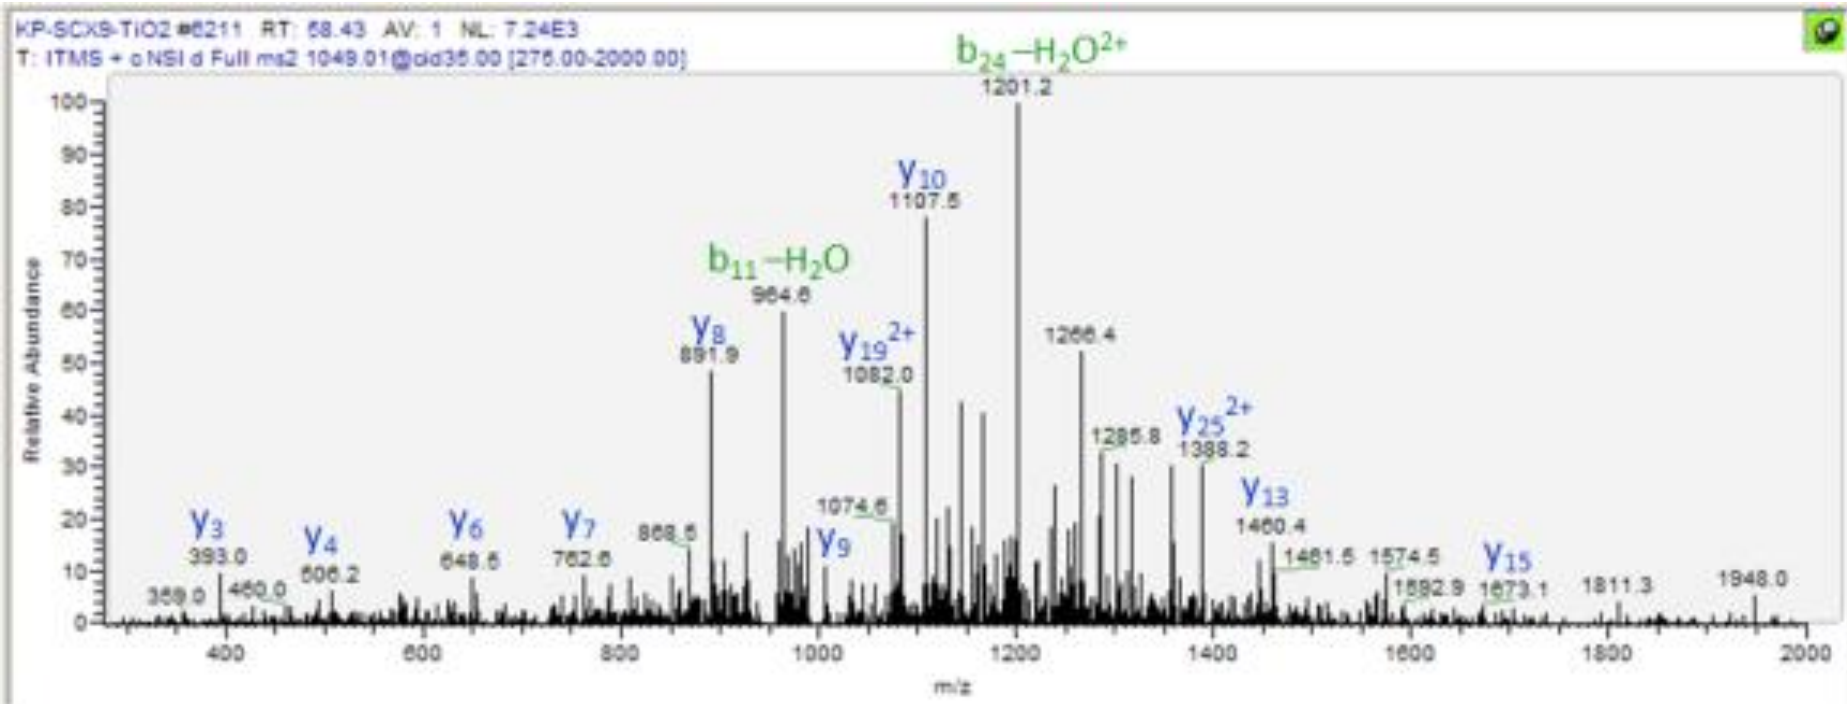

BAH65470

p[SGIGPVTAADIT]HDGDVEIVKPQHVICHLTDENAISM

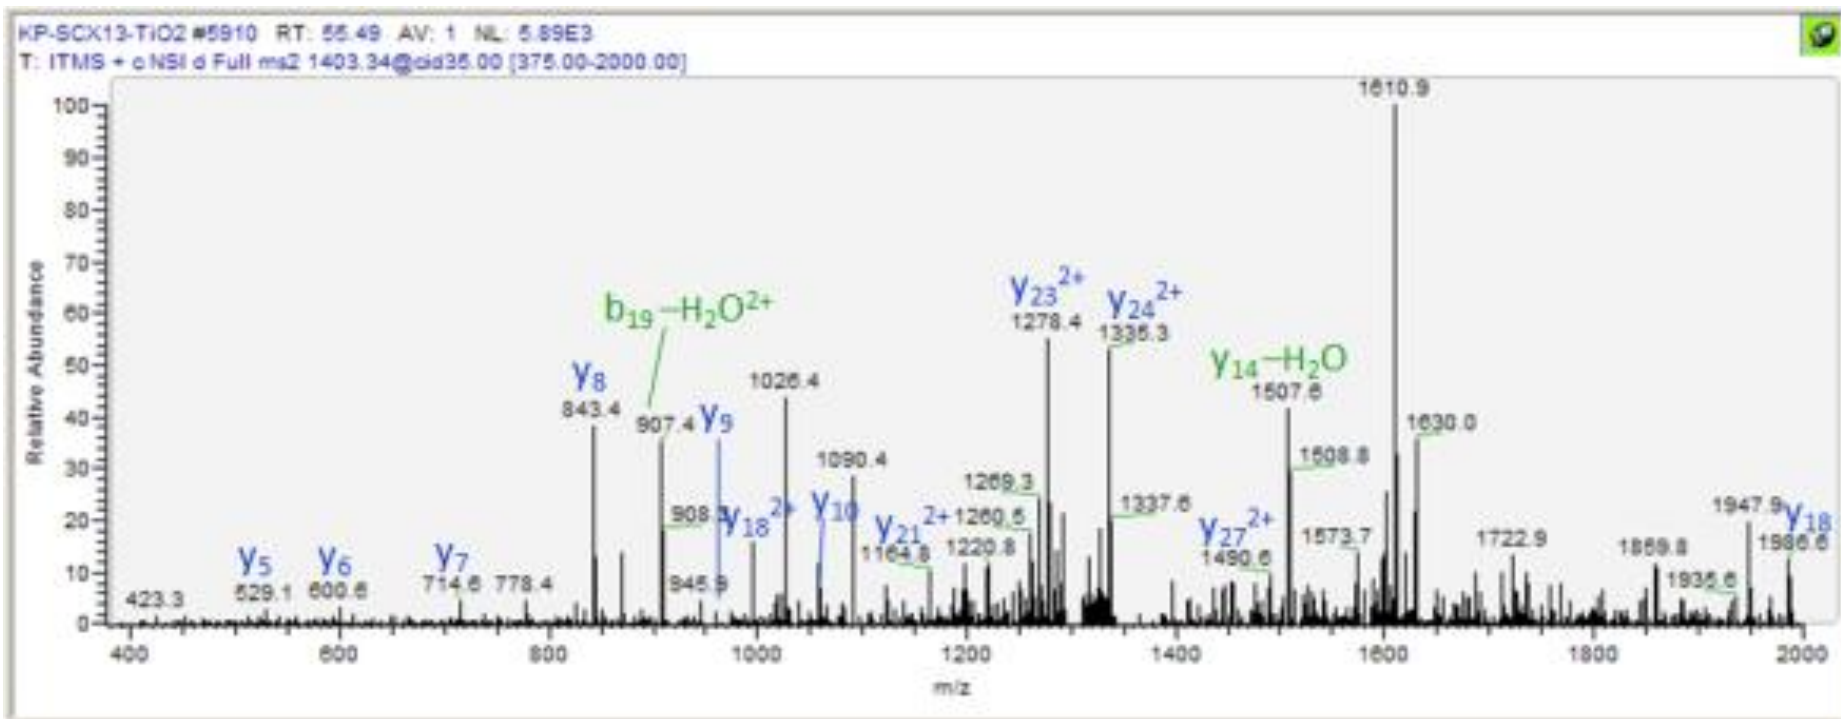

BAH65943

VRHDFE

S>YPEELHGK

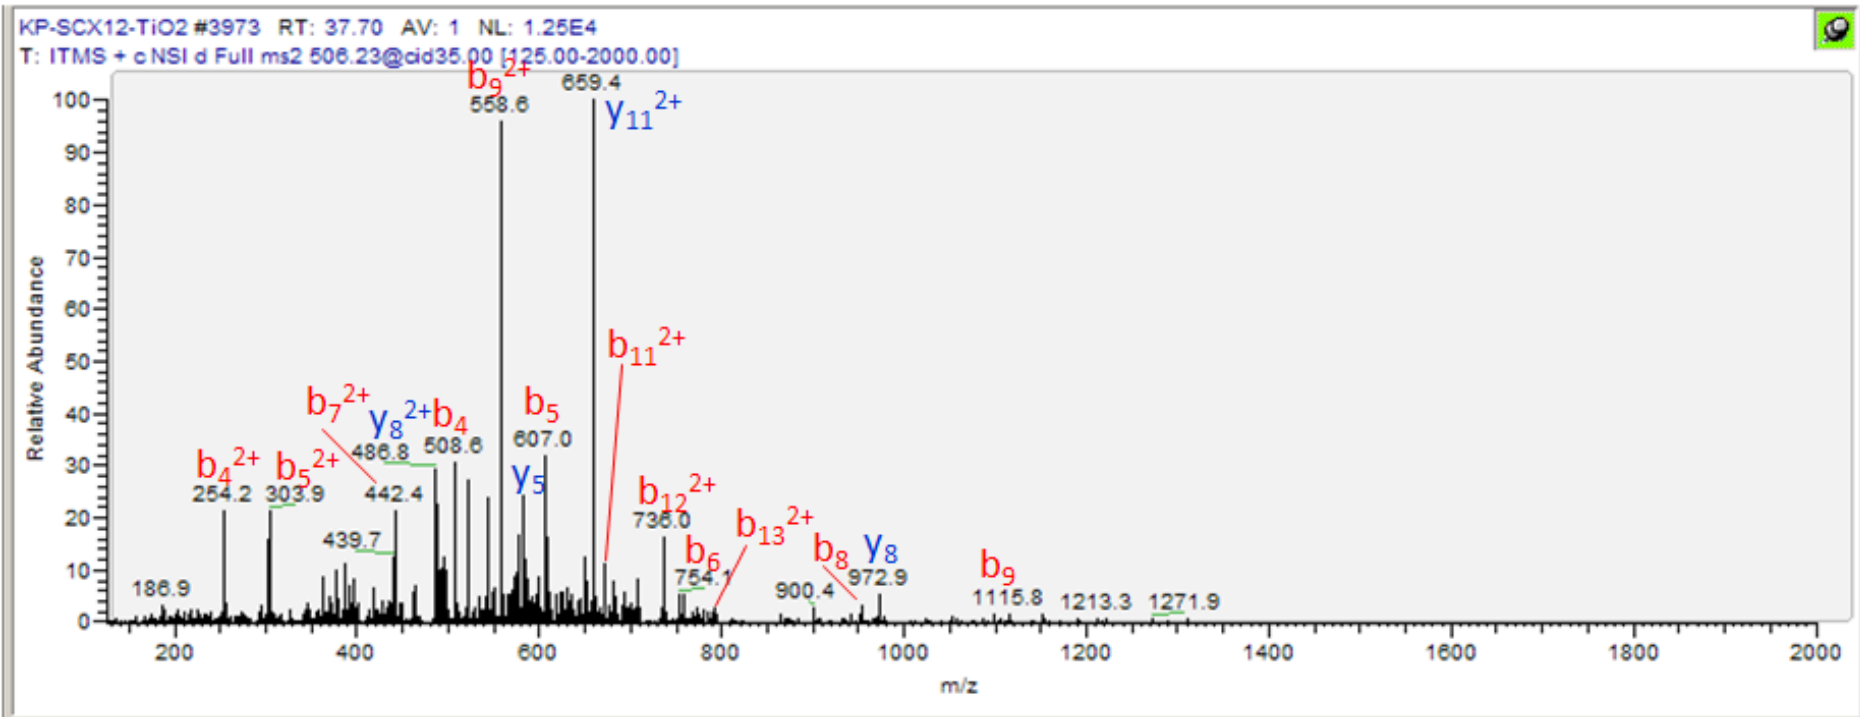

Supplement: M900276-MCP200_1.pdf [file M900276-MCP200_1.pdf]
