# Supplementary material
Source: PubMed Central journal article supplement (PMC2816022)
Supplement: M900276-MCP200_2.pdf [file M900276-MCP200_2.pdf]

ManB

Site-directed mutagenesis primer

5'-tgaacgaggacatcgccttc<sup>\*</sup>cgatcggc-3'

ggtgaactgggcgaggagctgaacgaggacatcgcctac<sup>\*</sup>cgatcggc

14 G E L G E E L N E D I A Y R 27

ManBY26F

ggtgaactgggcgaggagctgaacgaggacatcgccttc<sup>\*</sup>cgatcgg

14 G E L G E E L N E D I A F R 27

WcaJ

Site-directed mutagenesis primer

5'-ggaaatcttcatggcaaccttgttt<sup>\*</sup>catcggactcg-3'

gcaaccttgtatcatcgg

2 A T L Y H R 7

WcaJY5F

gcaaccttgttt<sup>\*</sup>catcgg

2 A T L F H R 7
