# Supplementary material
Source: PubMed Central journal article supplement (PMC2816022)

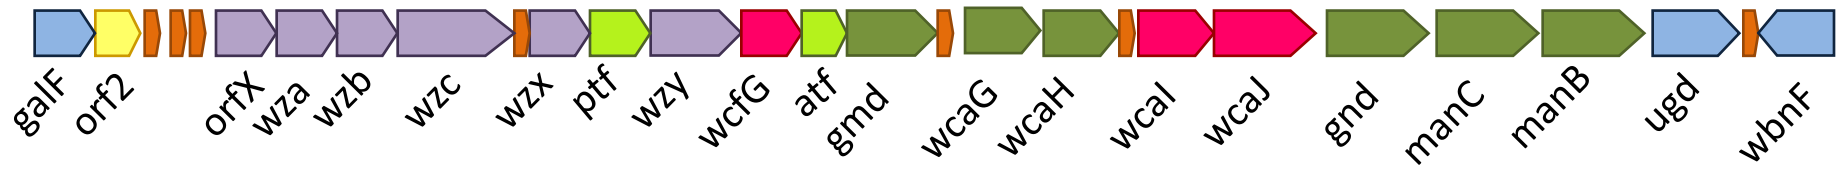

### UDP-GalA ( )

wbnF : putative nucleotide sugar epimerase  
 ugd: putative UDP-glucose dehydrogenase  
 galF : UTP-glucose-1-phosphate uridylyltransferase

### GDP-Fuc ( )

manB: phosphomannomutase  
 manC: GDP-mannose pyrophosphorylase  
 gnd: gluconate-6-phosphate dehydrogenase, decarboxylating  
 wcaH: GDP-mannose mannosyl hydrolase  
 wcaG: GDP-fucose synthetase; GDP-mannose-4-keto-6-D epimerase  
 gmd: GDP-mannose 4,6-dehydratase

### Glycosyltransferation ( )

wcaJ: undecaprenolphosphate glycosyltransferase  
 wcaI: putative glycosyl transferase  
 wcfG: glycosyl transferase

### Sugar modification ( )

atf: galactoside *O*-acetyltransferase  
 ptf: sensory protein; polysaccharide pyruvyl transferase

### Capsule formation ( )

wzy: mucoviscosity-associated gene A  
 wxz: hypothetical protein  
 wzc: putative transmembrane protein  
 wzb: putative protein-tyrosine-phosphatase  
 wza: putative capsule polysaccharide export protein precursor  
 orfX: outmembrane protein

 Hypothetical protein

 ABC transporter

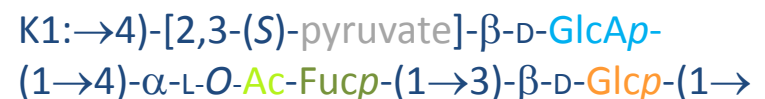

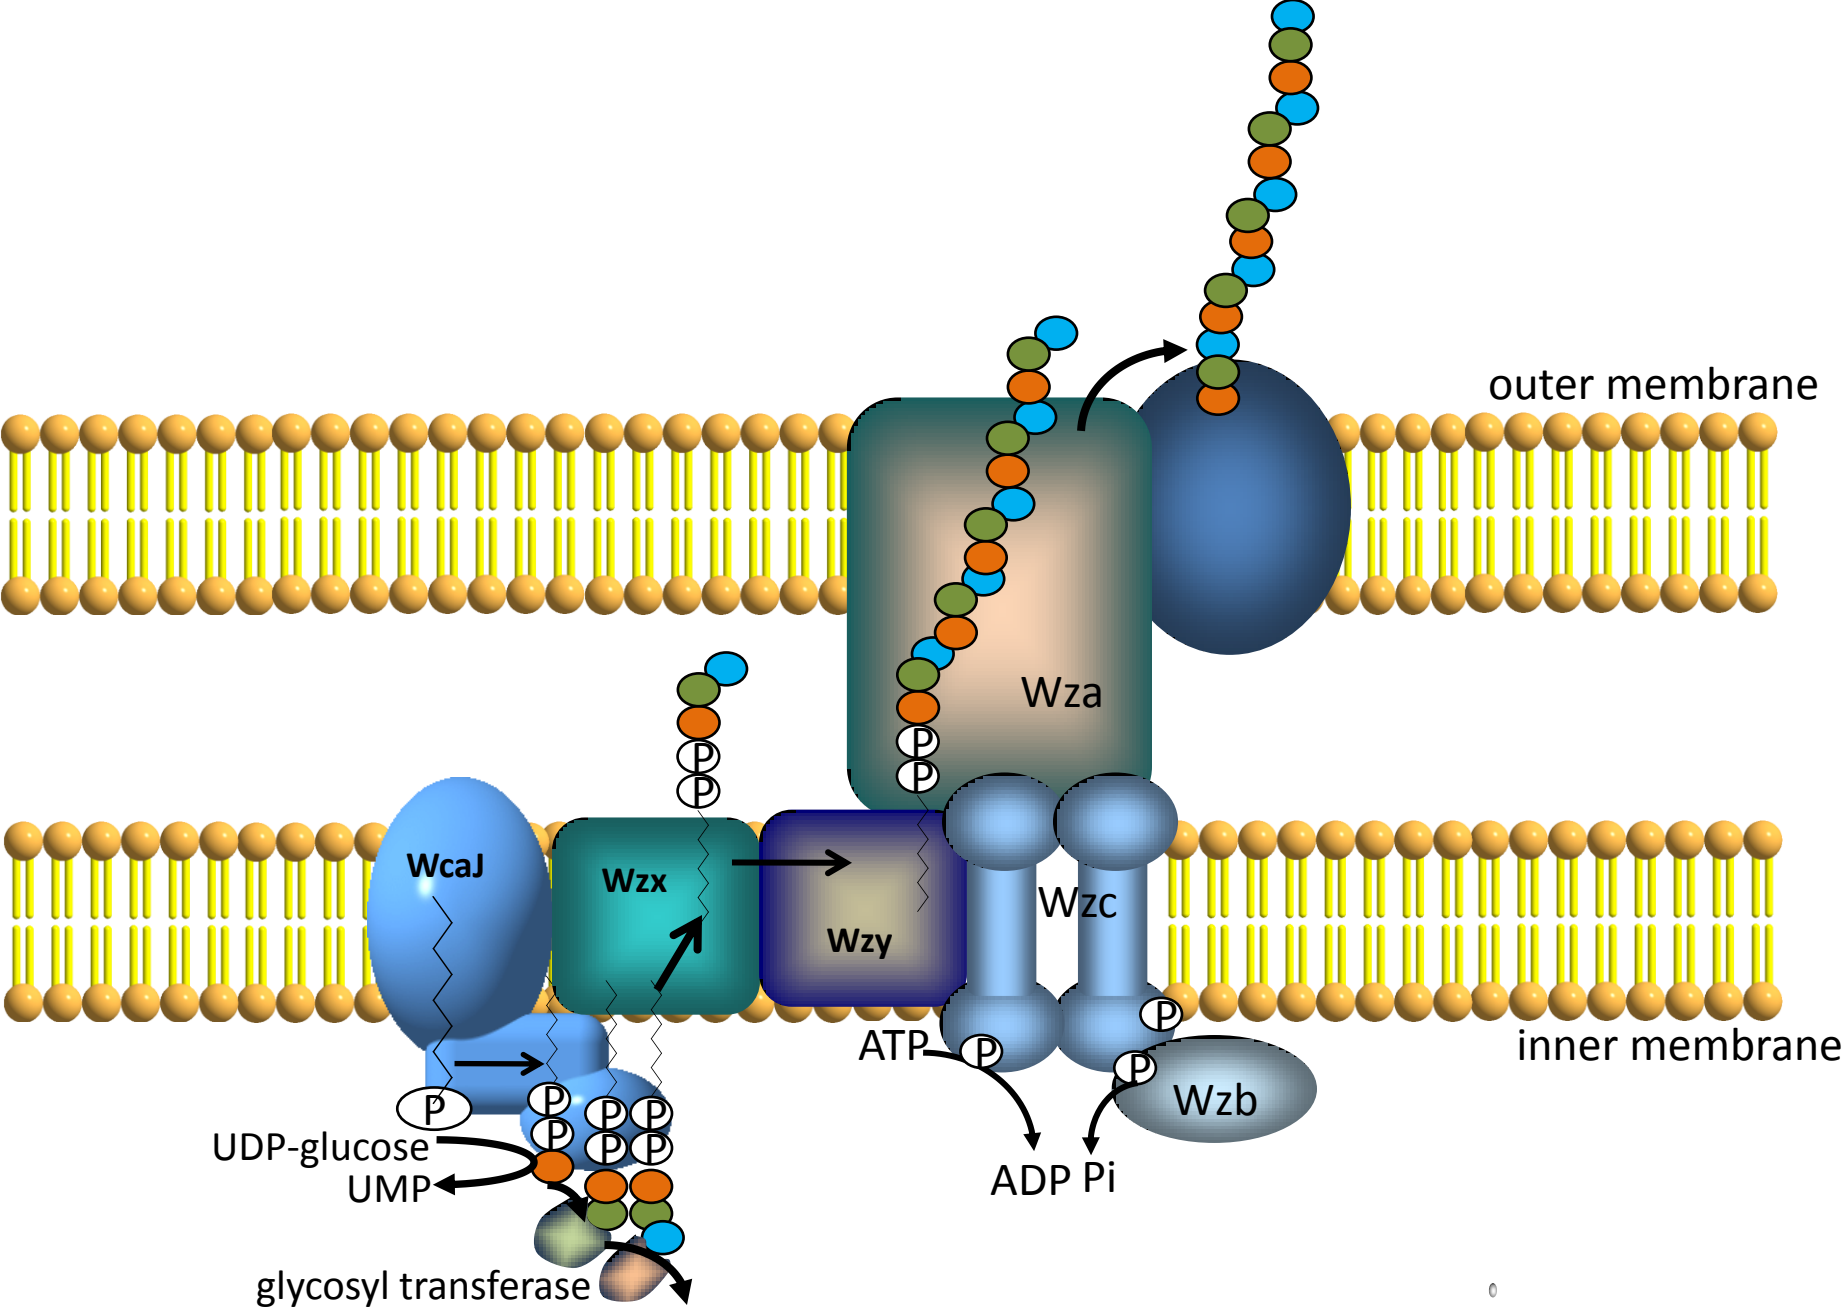

Supplement: M900276-MCP200_3.pdf [file M900276-MCP200_3.pdf]
