# Supplementary material
Source: PubMed Central journal article supplement (PMC2816022)
Supplement: M900276-MCP200_4.pdf [file M900276-MCP200_4.pdf]

(A)

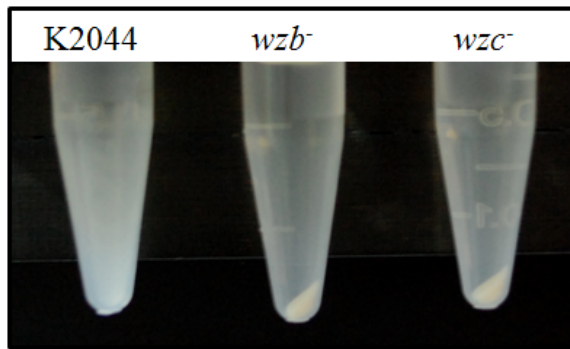

(B)

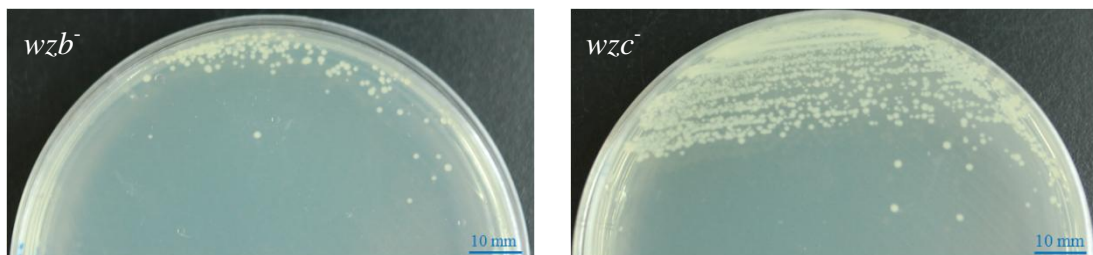

**Supplemental Data 4. Characterization of tyrosine phosphatase (*wzb*<sup>-</sup>) and kinase (*wzc*<sup>-</sup>) knockout strains.**

(A) These strains tested were cultured overnight in LB broth at 37°C and subjected to centrifugation at 10,000 xg for 5 min. In contrast to highly encapsulated strains, K2044, *wzb*<sup>-</sup> and *wzc*<sup>-</sup> mutants showed compact pellet after centrifugation. (B) These strains were cultured overnight on LB agar plates at 37°C. The diameters of *wzb*<sup>-</sup> and *wzc*<sup>-</sup> were less than 1.5 mm like *magA*<sup>-</sup> strain.
