# Supplementary material
Source: PubMed Central journal article supplement (PMC2816022)
Supplement: M900276-MCP200_5.pdf [file M900276-MCP200_5.pdf]

|                     | 10                | 20                        | 30                   | 40                  | 50            | 60            | 70           | 80          | 90 |
|---------------------|-------------------|---------------------------|----------------------|---------------------|---------------|---------------|--------------|-------------|----|
| K2044               | MATNYHRTRSNANASLI | SMAQRFS                   | SDVVIIIFLGLYLVCVMNS  | VSFEYRHALMSLLSLVIFQ | MIGGITDFYRS   | SWRGVAFST     | EYILLIKNWTLS |             |    |
| <i>E. coli</i> K12  | MTNLKXRERAKTNASLI | SMVQRFSDITIMFAGLWLVCEVSG  | LSFLYMHELLVALITLVVFQ | MIGGITDFYRS         | SWRGVRAATEF   | FALLLQNWTL    |              |             |    |
| <i>E. canceroge</i> | MTNLKXRDRARTNASLI | SMVQRFSDITIMVGGGLWVVCQISG | QSFLYMHELLMALIALVVFQ | MIGGMTDFYRS         | SWRGVKITTELM  | LLQLQNWTL     |              |             |    |
| <i>S. flexneri</i>  | MTNLKXRERAKTNASLI | SMVQRFSDITIMFAGLWLVCEVSG  | LSFLYMHELLVALITLVVFQ | MIGGITDFYRS         | SWRGVRAATEF   | FALLLQNWTL    |              |             |    |
| <i>P. syringae</i>  | -MRPSVRGILHAHQSA  | LSLAHRLDLIIIVLIGYQOTGLQ   | VTDSTEAWSHIILAVLVF   | HWVSEYHQLYG         | SWRGERILRELTK | VFSYWAIT      |              |             |    |
| <i>S. enterica</i>  | MTNLKXRERAKTNASLI | SMVQRFSDITIMFAGLWLVCEVSG  | LSFLYMHELLVALITLVVFQ | MIGGMTDFYRS         | SWRGVKMSTELT  | LLQLQNWTL     |              |             |    |
| <i>S. typhi</i>     | MTNLKXRERAKTNASLI | SMVQRFSDITIMFAGLWLVCEVSG  | LSFLYMHELLVALITLVVFQ | MIGGMTDFYRS         | SWRGVKMSTELT  | LLQLQNWTL     |              |             |    |
| <i>S. typhimuri</i> | MTNLKXRERAKTNASLI | SMVQRFSDITIMFAGLWLVCEVSG  | LSFLYMHELLVALITLVVFQ | MIGGITDFYRS         | SWRGVKMSTELT  | LLQLQNWTL     |              |             |    |
| <i>S. proteamac</i> | MALNHHRTHSKTNASLI | SMAQRFS                   | SDIFIIIFLGLYVIVFLNS  | QPFNYRHLLVFLIVLVVYQ | MIGGMTDFYRS   | SWRGGKISTELI  | LLIQNWTL     |             |    |
| <i>S. frigidima</i> | ---MDAQKALDVEKDS  | YTFLYRLIDILIIICFN         | SALILYG              | EDFSKDYLI           | VLIFTLVYSYLS  | SEFQLYRS      | SWRVGKFSRMIG | SLCLVKLFC   |    |
| <i>S. boydii</i>    | MTNLKXRERAKTNASLI | SMVQRFSDITIMFAGLWLVCEVSG  | LSFLYMHELLVALITLVVFQ | MIGGITDFYRS         | SWRGVRAATEF   | FALLLQNWTL    |              |             |    |
| <i>V. cholerae</i>  | --MKRKSRRIRITNY   | HGKFFYRLIDSIFILV          | IMYISIKSNQ           | HVVMTMSYIS          | VALLGVLFYSYIA | ESLDIYSGWRTAK | LRSLSLHTAF   | CWAAT       |    |
| <i>V. harveyi</i>   | ---MKRGLIRSHEVE   | FAPFLYRLTDLAVIVS          | FMLFLILNDV           | TSIEKDYVILS         | FVSVVTF       | FIIAESGKLYRS  | SWRTSSFKDQ   | VEIVCVSWLVT |    |

|                     | 100           | 110                | 120                | 130                | 140        | 150       | 160      | 170    | 180      |               |
|---------------------|---------------|--------------------|--------------------|--------------------|------------|-----------|----------|--------|----------|---------------|
| K2044               | LLIALGLLSLDS  | SIDTRFF            | FFFFQWYLLVDIGFLVCR | SIIRLISGLLRKFGYNTR | RVAVVGS    | SLPAGINLL | LKSFIEEP | PWLG   | FVVKG    | VYD           |
| <i>E. coli</i> K12  | VIFSAGLVAFNN  | DFDTQLKIWLAWYALTS  | SIGLVVCRSCIRIGAGW  | LRNHGYNKRM         | VAVAGDLAAG | QMLMES    | SFRNQ    | PWLG   | FVVGVYHD |               |
| <i>E. canceroge</i> | LIFSAGLVAFSQ  | DFDNRLVTYLAWYLLTS  | SVGMVVCRLIRFGAGW   | LRNHGYNTRY         | VAVAGDLPV  | GOVLLNS   | SFRKEP   | PWLG   | FVVGIYHD |               |
| <i>S. flexneri</i>  | VIFSAGLVAFNN  | DFDTQLKIWLAWYGLTS  | SIGLVVCRSCIRIGAGW  | LRNHGYNKRM         | VAVAGDLAAG | QMLMES    | SFRNQ    | PWLG   | FVVGVYHD |               |
| <i>P. syringae</i>  | FITLLSLNSLLL  | NQTQLPDNGQMSWFALT  | LAVLCGYRLIRLALHT   | LRRHGFNTR          | RVAVVGTG   | QVGERL    | LARSISL  | LAPMM  | GLNLLG   | FYDS          |
| <i>S. enterica</i>  | LIFSAGLVAFND  | DFDNRLATWLAWYALSSL | GLVLCRSFIRFGAGW    | LRNHGYNTRR         | VAVAGDLP   | AGALLDS   | SFRNEP   | PWLG   | FVVGVYHD |               |
| <i>S. typhi</i>     | LIFSAGLVAFND  | DFDNRLATWLAWYALSSL | GLVLCRSFIRFGAGW    | LRNHGYNTRR         | VAVAGDLP   | AGALLDS   | SFRNEP   | PWLG   | FVVGVYHD |               |
| <i>S. typhimuri</i> | LIFSAGLVAFND  | DFDNRLATWLAWYALSSL | GLVLCRSFIRFGAGW    | LRNHGYNTRR         | VAVAGDLP   | AGALLDS   | SFRNEP   | PWLG   | FVVGVYHD |               |
| <i>S. proteamac</i> | FIFTIGLVSFLP  | EFDFSLKIFFQWYLLV   | SLGLVGCRIAIRFLAG   | FVRNLGYNTR         | RVAVAGSMP  | VGLSLLR   | GFKAD    | SWLGF  | MVVG     | VYDD          |
| <i>S. frigidima</i> | FFIVASSFLFLKE | SESYSRIIIVGWFLS    | IIISLMTWRYLAKW     | VKSIRRRSGL         | GFQDAIVGLT | STGINLY   | REIKNY   | ELGF   | NFVGF    | FDD           |
| <i>S. boydii</i>    | VIFSAGLVAFNN  | DFDTQLKIWLAWYGLTS  | SIGLVVCRSCIRIGAGW  | LRNHGYNKRM         | VAVAGDLAAG | QMLMES    | SFRNQ    | PWLG   | FVVGVYHD |               |
| <i>V. cholerae</i>  | IASLTLLAYFSKT | GIEFSRMVMGAWFV     | GSFIGHLGWRVLA      | FATHYMHKK          | GLHTKKV    | VIIIGMTT  | QOELSN   | NLLKN  | PELGI    | VMOGFYDD      |
| <i>V. harveyi</i>   | CAPLFMVLYFS   | HVHTLFFERYILAT     | WLLVTPILLAWRS      | VFRIALAYMR         | KLGYNTR    | TATIIIGQ  | TPHGLTL  | LANELE | SRT      | TEHGVLPDGFYDE |

|                     | 190        | 200        | 210         | 220          | 230          | 240       | 250     | 260    | 270       |        |         |         |        |     |       |       |     |       |      |   |   |       |
|---------------------|------------|------------|-------------|--------------|--------------|-----------|---------|--------|-----------|--------|---------|---------|--------|-----|-------|-------|-----|-------|------|---|---|-------|
| K2044               | IQLDTS     | ---YDNV    | PYAGNIDKLIQ | EAR          | DGKIDRIYIAMS | MHDESKIK  | DIVRQLT | DTTCSV | LLIPD     | I      | FTFNIL  | QSRTE   | EEING  | V   | PV    | VPLFI |     |       |      |   |   |       |
| <i>E. coli</i> K12  | PKPGG      | -----      | VSNDWAGN    | LQQLVEDAKAG  | KIHN         | VYIAMQ    | MDGARV  | VKLVH  | QLADTTCS  | VLLIPD | VFTFNIL | HSRLE   | EMNG   | V   | PV    | VPLYI |     |       |      |   |   |       |
| <i>E. canceroge</i> | AKPGG      | -----      | VSSDWAGN    | YEQQLVEDAKAG | KIHN         | VYIAMQ    | MDESCIK | TLVRDL | ADTTCS    | VILIPD | VFTFNIL | HSRLE   | EMNG   | V   | PV    | VPLYI |     |       |      |   |   |       |
| <i>S. flexneri</i>  | PKPGG      | -----      | VSNDWAGN    | LQQLVEDAKAG  | KIHN         | VYIAMQ    | MDGARV  | VKLVH  | QLADTTCS  | VLLIPD | VFTFNIL | HSRLE   | EMNG   | V   | PV    | VPLYI |     |       |      |   |   |       |
| <i>P. syringae</i>  | HPQOMNLQAE | KRRLPVLGDL | DQIEDARAGRL | DKVYITLAF    | SAEPQL       | RELITGLSD | TASVYL  | LIPDV  | FMFDLL    | HARSE  | SINGL   | ASISIFI |        |     |       |       |     |       |      |   |   |       |
| <i>S. enterica</i>  | PKPGG      | -----      | VSADWAGN    | FQQLIDDAKAS  | RIHN         | VYIAMSM   | SDGSMV  | VKLV   | RELADTTCS | VILIPD | VFTFNIL | HSRVE   | EMSG   | V   | PV    | VPLYI |     |       |      |   |   |       |
| <i>S. typhi</i>     | PKPGG      | -----      | VSADWAGN    | FQQLIDDAKAS  | RIHN         | VYIAMSM   | SDGAMV  | VKLV   | RELADTTCS | VILIPD | VFTFNIL | HSRVE   | EMSG   | V   | PV    | VPLYI |     |       |      |   |   |       |
| <i>S. typhimuri</i> | PKPGG      | -----      | VSADWAGN    | FQQLIDDAKAS  | RIHN         | VYIAMSM   | SDGAMV  | VKLV   | RELADTTCS | VILIPD | VFTFNIL | HSRVE   | EMSG   | V   | PV    | VPLYI |     |       |      |   |   |       |
| <i>S. proteamac</i> | TPISE      | -----      | EGIEYV      | VGDFSKLIED   | AREGLDRI     | YIAMSM    | GDEV    | NIKLV  | VKKLTD    | TTCSV  | MLIPD   | LFTFNIL | QSRTE  | E   | VNG   | V     | PV  | VPLFI |      |   |   |       |
| <i>S. frigidima</i> | REPKRLG    | --GMQ      | TNLIBGDVNEA | VALAKSGKI    | QKLYIC       | LEPMAEK   | RIADIE  | QLGNTT | V         | DLITP  | DFLLKN  | LMQARIG | SVGD   | V   | DTIS  | V     | VFE |       |      |   |   |       |
| <i>S. boydii</i>    | PKPGG      | -----      | VSNDWAGN    | LQQLVEDAKAG  | KIHN         | VYIAMQ    | MDGARV  | VKLVH  | QLADTTCS  | VLLIPD | VFTFNIL | HSRLE   | EMNG   | V   | PV    | VPLYI |     |       |      |   |   |       |
| <i>V. cholerae</i>  | RAPER      | ---L       | RKG-APV     | LGNINDALS    | LAKTGQ       | VQNVYIA   | LEMQAQR | RINQIL | DAFSD     | STVNTY | I       | VPDEF   | FTFNIL | HSR | MYTIG | D     | VNA | F     | SIFI |   |   |       |
| <i>V. harveyi</i>   | RSQDR      | ---L       | BSDYPI      | KGNVGLAL     | ERAKR        | GEVDY     | VYIAM   | P      | HANERIAL  | F      | LNQFSD  | TTANTY  | LIPD   | F   | FTY   | NLL   | HSR | MDQIG | QV   | Q | T | LSVFI |

|                         | 280                                                                                            | 290 | 300 | 310 | 320 | 330 | 340 | 350 | 360 |
|-------------------------|------------------------------------------------------------------------------------------------|-----|-----|-----|-----|-----|-----|-----|-----|
| K2044                   | SPLNGINMVFKRLEDIIVSSLILILLIISPILLVIATAVKTTSKGPVIFRQVRYGMDGKPIKVKFRSMTVMENDDKVVTQATKNDIRVTKVVGK |     |     |     |     |     |     |     |     |
| <i>E. coli</i> K12      | TPLSGVNRLLKRAEDIVLATLILLIISPVLCCIALAVKLS SPGPVIFRQTRYGMDGKPIKVKFRSMKVMENDKVVVTQATQNDERVTKVGN   |     |     |     |     |     |     |     |     |
| <i>E. cancerogea</i>    | TPLSGINRVLKRAEDIVLSSLILLIISPVLCCIALAVKLS SPGPVIFRQTRYGMDGKPIKVKFRSMKVMENDSVVVTQATQNDERVTRVGN   |     |     |     |     |     |     |     |     |
| <i>S. flexneri</i>      | TPLSGVNRLLKRAEDIVLATLILLIISPVLCCIALAVKLS SPGPVIFRQTRYGMDGKPIKVKFRSMKVMENDKVVVTQATQNDERVTKVGN   |     |     |     |     |     |     |     |     |
| <i>P. syringae</i>      | SPMDGAWSLVKRAEDIVLSSLILLIALLPLLAIAAAIKLTSAGPVLFRQRRYGLDGRSIMVKFRSMSVQENADVVLQATRNDARVTPIGA     |     |     |     |     |     |     |     |     |
| <i>S. enterica</i>      | TPLSGINRLLKRAEDIVLASLILLIISPVLCCIALAVKLS SPGPVIFRQTRYGMDGKPIKVKFRSMKVMENDKVVVTQATQNDERVTRVGN   |     |     |     |     |     |     |     |     |
| <i>S. typhi</i>         | TPLSGINRLLKRAEDIVLASLILLIISPVLCCIALAVKLS SPGPVIFRQTRYGMDGKPKSVWRFRSMKVMENDKVVVTQATQNDERVTRVGN  |     |     |     |     |     |     |     |     |
| <i>S. typhimurium</i>   | TPLSGINRLLKRAEDIVLASLILLIISPVLCCIALAVKLS SPGPVIFRQTRYGMDGKPIKVKFRSMKVMENDKVVVTQATQNDERVTRVGN   |     |     |     |     |     |     |     |     |
| <i>S. proteamaculae</i> | THLNGINKVFKRLEDITLSMMILAFISPVLLIISLFFVKFTSPGPVIFRQTRYGMDGKPIKVKFRSMSVMENDNTVVQAKKHDARITKVVGK   |     |     |     |     |     |     |     |     |
| <i>S. frigidimarum</i>  | SPVNGMRRFYKRTFDVLFSTAILALTPIFLVIGAAIKLNSPGAVIFKQDRYGLDGRKIKVKFRSMSVTENS DVVTQATKGDARITTVGA     |     |     |     |     |     |     |     |     |
| <i>S. boydii</i>        | TPLSGVNRLLKRAEDIVLATLILLIISPVLCCIALAVKLS SPGPVIFRQTRYGMDGKPIKVKFRSMKVMENDKVVVTQATQNDERVTKVGN   |     |     |     |     |     |     |     |     |
| <i>V. cholerae</i>      | TPFNGLLNWVKRFEDLVLSSLILLIISPVLLAIAIGVKLS SPGPITFKQRYGLDGRKIQVKFRSMRVMDNGSHVQOATKGDPRVTRFGA     |     |     |     |     |     |     |     |     |
| <i>V. harveyi</i>       | TPFAGISSWVKRLEDIVLSSIILLIISPVLLAISLGIKLTSKGPVIFKQRYGLDGRKIEVVKFRSMTTMEQGN DVKQATKNDERITPFGG    |     |     |     |     |     |     |     |     |

|                         | 370                                                                                            | 380 | 390 | 400 | 410 | 420 | 430 | 440 | 450 |
|-------------------------|------------------------------------------------------------------------------------------------|-----|-----|-----|-----|-----|-----|-----|-----|
| K2044                   | FLRSTSLDELPOFFNVLFQMSVVGPRPHAVSHNEQYRSLIQGYMLRHKKVKGPGITGLAQINGWRGETDTLEKMEKRIEYDLLYIRGWSIWT   |     |     |     |     |     |     |     |     |
| <i>E. coli</i> K12      | FLRRTSLDELPOFFINVLTTGMSIVGPRPHAVAHNEQYRQLIEGYMLRHKKVKGPGITGWAQINGWRGETDTLEKMEKRVEFDLEYIREWSVWT |     |     |     |     |     |     |     |     |
| <i>E. cancerogea</i>    | FLRRTSLDELPOFFINVFTGGMSIVGPRPHAVAHNEQYRTLIEGYMLRHKKVKGPGITGWAQINGWRGETDTLEKMEKRIEFDLEYIREWSVWT |     |     |     |     |     |     |     |     |
| <i>S. flexneri</i>      | FLRRTSLDELPOFFINVLTTGMSIVGPRPHAVAHNEQYRQLIEGYMLRHKKVKGPGITGWAQINGWRGETDTLEKMEKRVEFDLEYIREWSVWT |     |     |     |     |     |     |     |     |
| <i>P. syringae</i>      | FLRRTSLDELPOFFINVLHGDMSIVGPRPHAVAHNEQYRQVSGYMLRHKKVKGPGITGWAQINGWRGETDTLDKMRMRVEFDLEYIEHWSIWT  |     |     |     |     |     |     |     |     |
| <i>S. enterica</i>      | FLRRTSLDELPOFFINVLTTGMSIVGPRPHAVAHNEQYRQLIEGYMLRHKKVKGPGITGWAQINGWRGETDTLEKMEKRVEFDLEYIREWSIWT |     |     |     |     |     |     |     |     |
| <i>S. typhi</i>         | FLRRTSLDELPOFFINVLTTGMSIVGPRPHAVAHNEQYRQLIEGYMLRHKKVKGPGITGWAQINGWRGETDTLEKMEKRVEFDLEYIREWSIWT |     |     |     |     |     |     |     |     |
| <i>S. typhimurium</i>   | FLRRTSLDELPOFFINVLTTGMSIVGPRPHAVAHNEQYRQLIEGYMLRHKKVKGPGITGWAQINGWRGETDTLEKMEKRVEFDLEYIREWSIWT |     |     |     |     |     |     |     |     |
| <i>S. proteamaculae</i> | FLRRTSLDELPOFFNVLFQMSVVGPRPHAVSHNEQYRSLIEGYMLRHKKVKGPGITGWAQINGWRGETDTLDKMQRVEYDLEYIREWSVWT    |     |     |     |     |     |     |     |     |
| <i>S. frigidimarum</i>  | FLRRTSLDELPOFFNVLFQDMSVVGPRPHAVAHNEEYRKLVTYYMLRHKKVLPGITGWAQVNGWRGETDTLDKMEKRIEYDLAYIRNWTTLWT  |     |     |     |     |     |     |     |     |
| <i>S. boydii</i>        | FLRRTSLDELPOFFINVLTTGMSIVGPRPHAVAHNEQYRQLIEGYMLRHKKVKGPGITGWAQINGWRGETDTLEKMEKRVEFDLEYIREWSVWT |     |     |     |     |     |     |     |     |
| <i>V. cholerae</i>      | FIRRTSLDELPOFFNVLQGSMSIVGPRPHAVAHNEQYRTIVNRYMLRHKKVKGPGITGWAQINGWRGETDTLDKMEKRVEFDLDYIHRWSLWT  |     |     |     |     |     |     |     |     |
| <i>V. harveyi</i>       | FLRRTSLDELPOFFINVLQGTMSIVGPRPHAVSHNEEYRQIVDRYMLRHKKVKGPGITGWAQINGWRGETDTLDKMEKRVEFDLDYIHHWSVWT |     |     |     |     |     |     |     |     |

|                         | 460                  | 470 |
|-------------------------|----------------------|-----|
| K2044                   | LDLKIIFLTVFKGFINKSAY |     |
| <i>E. coli</i> K12      | FDIKIVFLTVFKGFVNKAAY |     |
| <i>E. cancerogea</i>    | FDIKIVFLTIFKGFVNKAAY |     |
| <i>S. flexneri</i>      | FDIKIVFLTVFKGFVNKAAY |     |
| <i>P. syringae</i>      | LDLKIILLTLFKGFVNKNAP |     |
| <i>S. enterica</i>      | FDIKIVFLTIFKGFVNKAAY |     |
| <i>S. typhi</i>         | FDIKIVFLTIFKGFVNKAAY |     |
| <i>S. typhimurium</i>   | FDIKIVFLTIFKGFVNKAAY |     |
| <i>S. proteamaculae</i> | FDIKIILLTVFKGFMHKSAY |     |
| <i>S. frigidimarum</i>  | WDVKIVFMTIFKGFVGNVY  |     |
| <i>S. boydii</i>        | FDIKIVFLTVFKGFVNKAAY |     |
| <i>V. cholerae</i>      | FDLKIVFLTIFKGFVGNAY  |     |
| <i>V. harveyi</i>       | MDIKIIFLTVFKGFTGSNAY |     |
